# Supplementary material
Source: PubMed Central journal article supplement (PMC6990715)
Supplement: jamapediatr-174-149-s001.pdf [file jamapediatr-174-149-s001.pdf]

## Supplementary Online Content

Ouidir M, Buck Louis GM, Kanner J, et al. Association of maternal exposure to persistent organic pollutants in early pregnancy with fetal growth. *JAMA Pediatr*. Published online December 30, 2019. doi:10.1001/jamapediatrics.2019.5104

**eFigure 1.** Flowchart, NICHD Fetal Growth Studies– Singletons (n=2,284)

**eFigure 2.** Changes in Head Measurements for Each 5% Increase (Quantile) of POPs Mixture Exposure Using the 25<sup>th</sup> Percentiles as the Reference Point, NICHD Fetal Growth Studies – Singletons (n=2,284)

**eFigure 3.** Changes in Arm Measurements for Each 5% Increase (Quantile) of POPs Mixture Exposure Using the 25<sup>th</sup> Percentiles as the Reference Point, NICHD Fetal Growth Studies – Singletons (n=2,284)

**eFigure 4.** Changes in Leg Measurements for Each 5% Increase (Quantile) of POPs Mixture Exposure Using the 25<sup>th</sup> Percentiles as the Reference Point, NICHD Fetal Growth Studies – Singletons (n=2,284)

**eFigure 5.** Changes in Cerebral Width, Inner Orbit Diameter and Outer Orbit Diameter for Each 5% Increase (Quantile) of POPs Mixture Exposure Using the 25<sup>th</sup> Percentiles as the Reference Point, NICHD Fetal Growth Studies – Singletons (n=2,284)

**eFigure 6.** Changes in Estimated Fetal Weight for Each 5% Increase (Quantile) of POPs Mixture Exposure Using the 25<sup>th</sup> Percentiles as the Reference Point, NICHD Fetal Growth Studies – Singletons (n=2,284)

**eFigure 7.** Changes in Longitudinal Head Circumference, Abdominal Circumference and Femur Length by Fetal Sex for Each 5% Increase (Quantile) of POPs Mixture Exposure Using the 25<sup>th</sup> Percentiles as the Reference Point, NICHD Fetal Growth Studies – Singletons (n=2,284)

**eFigure 8.** Changes in Longitudinal Head Circumference, Abdominal Circumference and Femur Length by Maternal Race/Ethnicity for Each 5% Increase (Quantile) of POPs Mixture Exposure Using the 25<sup>th</sup> Percentiles as the Reference Point, NICHD Fetal Growth Studies – Singletons (n=2,284)

**eTable 1.** Comparison Between the Original Cohort and the Study Population (Pregnant Women from the NICHD Fetal Growth Studies – Singletons

**eTable 2.** Comparison of the POPs Exposures (Median (25<sup>th</sup>, 75<sup>th</sup> percentile) at Enrollment Between Included and Excluded Pregnant Women from the NICHD Fetal Growth Studies – Singletons.

**eTable 3.** Organochlorine Pesticides – Estimation of the Contribution of Individual Chemical to the Fetal Growth Changes When the Chemical of Interest Changes from the 25<sup>th</sup> to the 75<sup>th</sup> Percentile While All of the Other Chemicals in the Mixture Are Fixed to Their 25<sup>th</sup> Percentile, NICHD Fetal Growth Studies – Singletons (n=2,284)

**eTable 4.** Polybrominated Diphenyl Ethers – Estimation of the Contribution of Individual Chemical to the Fetal Growth Changes When the Chemical of Interest Changes from the 25<sup>th</sup> to

the 75<sup>th</sup> Percentile While All of the Other Chemicals in the Mixture Are Fixed to Their 25<sup>th</sup> Percentile, NICHD Fetal Growth Studies – Singletons (n=2,284)

**eTable 5.** Poly-and-Perfluorinated Alkyl Substances – Estimation of the Contribution of Individual Chemical to the Fetal Growth Changes When the Chemical of Interest Changes from the 25th to the 75th Percentile While All of the Other Chemicals in the Mixture Are Fixed to Their 25th Percentile, NICHD Fetal Growth Studies – Singletons (n=2,284)

**eTable 6.** Polychlorinated Biphenyl Congeners – Estimation of the Contribution of Individual Chemical to the Fetal Growth Changes When the Chemical of Interest Changes from the 25th to the 75th Percentile While All of the Other Chemicals in the Mixture Are Fixed to Their 25th Percentile, NICHD Fetal Growth Studies – Singletons (n=2,284)

**eTable 7.** Association Between EDCs and Longitudinal Head Circumference Using a Generalized Additive Mixed Model, NICHD Fetal Growth Studies – Singletons (n=2,284)

**eTable 8.** Association Between EDCs and Longitudinal Biparietal Diameter Using a Generalized Additive Mixed Model, NICHD Fetal Growth Studies – Singletons (n=2,284)

**eTable 9.** Association Between EDCs and Longitudinal Occipital-Frontal Diameter Using a Generalized Additive Mixed Model, NICHD Fetal Growth Studies – Singletons (n=2,284)

**eTable 10.** Association Between EDCs and Longitudinal Abdominal Circumference Using a Generalized Additive Mixed Model, NICHD Fetal Growth Studies – Singletons (n=2,284)

**eTable 11.** Association Between EDCs and Longitudinal Humerus Length Using a Generalized Additive Mixed Model, NICHD Fetal Growth Studies – Singletons (n=2,284)

**eTable 12.** Association Between EDCs and Longitudinal Radial Length Using a Generalized Additive Mixed Model, NICHD Fetal Growth Studies – Singletons (n=2,284)

**eTable 13.** Association Between EDCs and Longitudinal Ulnar Length Using a Generalized Additive Mixed Model, NICHD Fetal Growth Studies – Singletons (n=2,284)

**eTable 14.** Association Between EDCs and Longitudinal Femur Length Using a Generalized Additive Mixed Model, NICHD Fetal Growth Studies – Singletons (n=2,284)

**eTable 15.** Association Between EDCs and Longitudinal Tibia Length Using a Generalized Additive Mixed Model, NICHD Fetal Growth Studies – Singletons (n=2,284)

**eTable 16.** Association Between EDCs and Longitudinal Fibula Length Using a Generalized Additive Mixed Model, NICHD Fetal Growth Studies – Singletons (n=2,284)

**eTable 17.** Association Between EDCs and Longitudinal Foot Length Using a Generalized Additive Mixed Model, NICHD Fetal Growth Studies – Singletons (n=2,284)

**eTable 18.** Association Between EDCs and Longitudinal Estimated Fetal Growth Using a Generalized Additive Mixed Model, NICHD Fetal Growth Studies – Singletons (n=2,284)

**eTable 19.** Association Between EDCs and Longitudinal Cerebral Width Using a Generalized Additive Mixed Model, NICHD Fetal Growth Studies – Singletons (n=2,284)

**eTable 20.** Association Between EDCs and Longitudinal Inner Orbit Diameter Using a Generalized Additive Mixed Model, NICHD Fetal Growth Studies – Singletons (n=2,284)

**eTable 21.** Association Between EDCs and Longitudinal Outer Orbit Diameter Using a Generalized Additive Mixed Model, NICHD Fetal Growth Studies – Singletons (n=2,284)

This supplementary material has been provided by the authors to give readers additional information about their work.

**eFigure 1: Flowchart, NICHD Fetal Growth Studies – Singletons (n=2,284).**

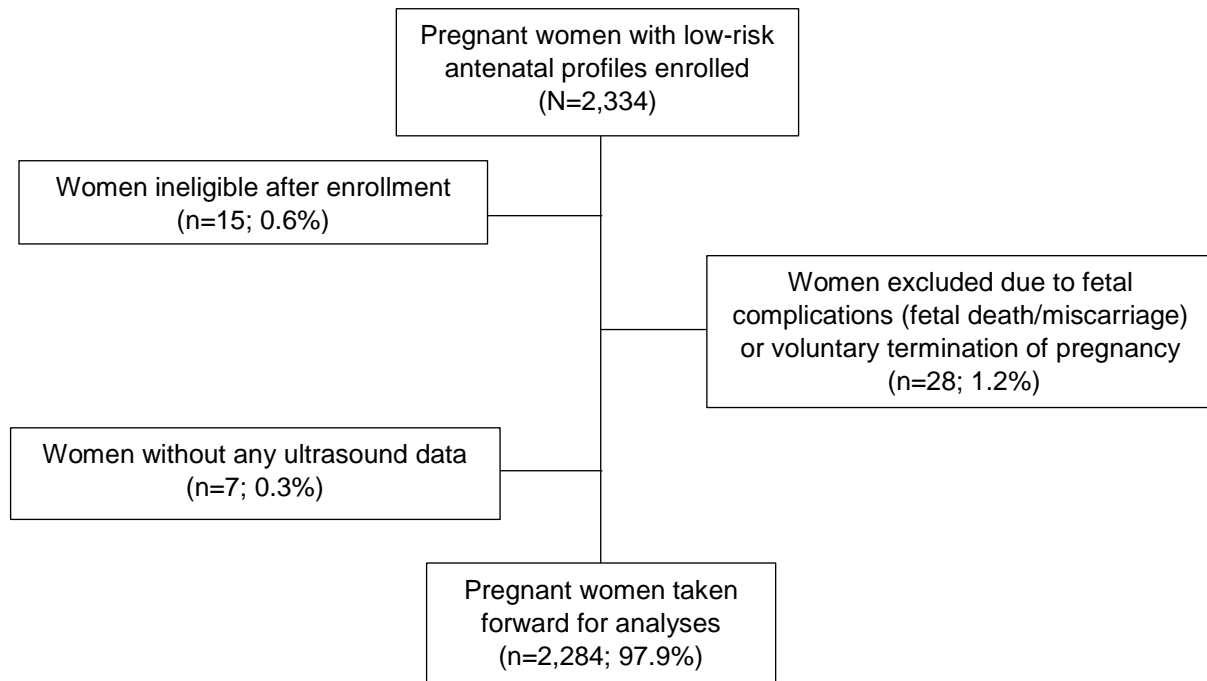

**eFigure 2: Changes in head measurements for each 5% increase (quantile) of POPs mixture exposure using the 25<sup>th</sup> percentiles as the reference point, NICHD Fetal Growth Studies – singletons (n=2,284).**

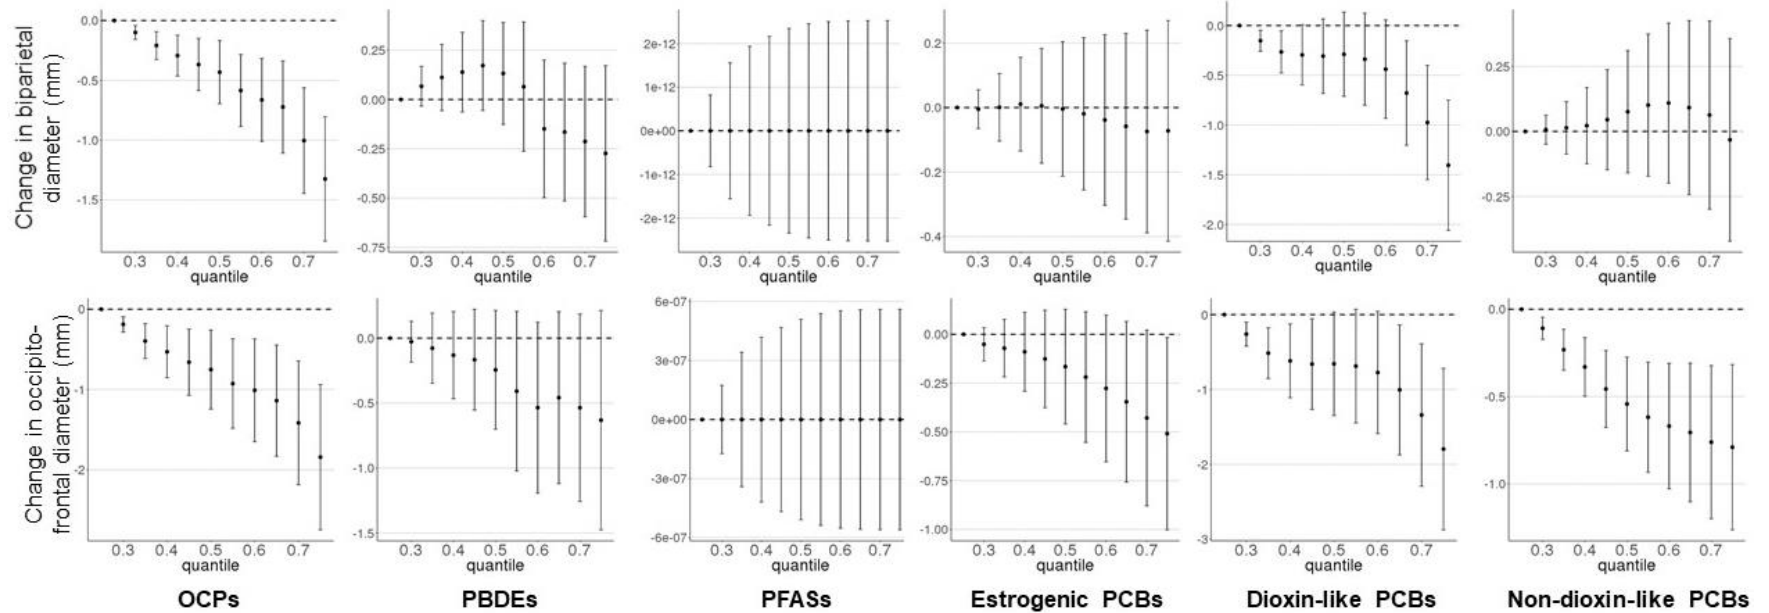

The dot corresponds to the estimate and the vertical lines correspond to the 95% confidence intervals. The dashed horizontal line represents the NULL. Adjusted for maternal race/ethnicity, maternal age, pre-pregnancy BMI, parity, highest level of education, marital status, infant sex, gestational age at the time of ultrasound, total plasma lipids (except for PFASs) and log transformed plasma cotinine level, with repeated measurements of fetal growth

**eFigure 3: Changes in arm measurements for each 5% increase (quantile) of POPs mixture exposure using the 25<sup>th</sup> percentiles as the reference point, NICHD Fetal Growth Studies – singletons (n=2,284).**

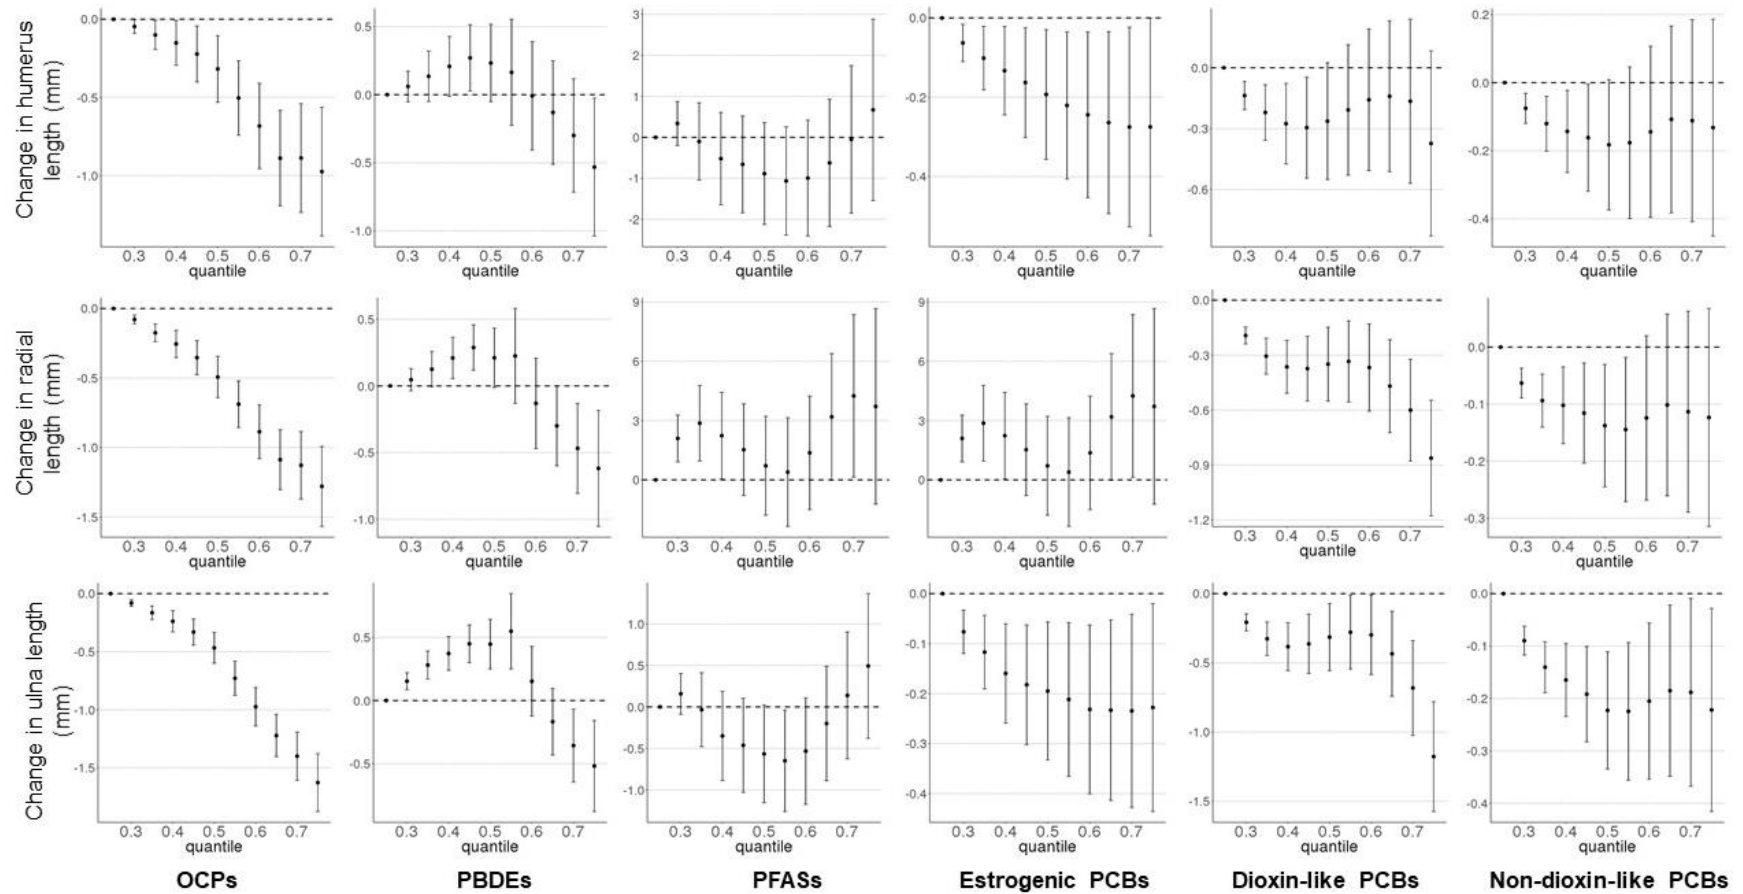

The dot corresponds to the estimate and the vertical lines correspond to the 95% confidence intervals. The dashed horizontal line represents the NULL. Adjusted for maternal race/ethnicity, maternal age, pre-pregnancy BMI, parity, highest level of education, marital status, infant sex, gestational age at the time of ultrasound, total plasma lipids (except for PFASs) and log transformed plasma cotinine level, with repeated measurements of fetal growth

**eFigure 4: Changes in leg measurements for each 5% increase (quantile) of POPs mixture exposure using the 25<sup>th</sup> percentiles as the reference point, NICHD Fetal Growth Studies – singletons (n=2,284).**

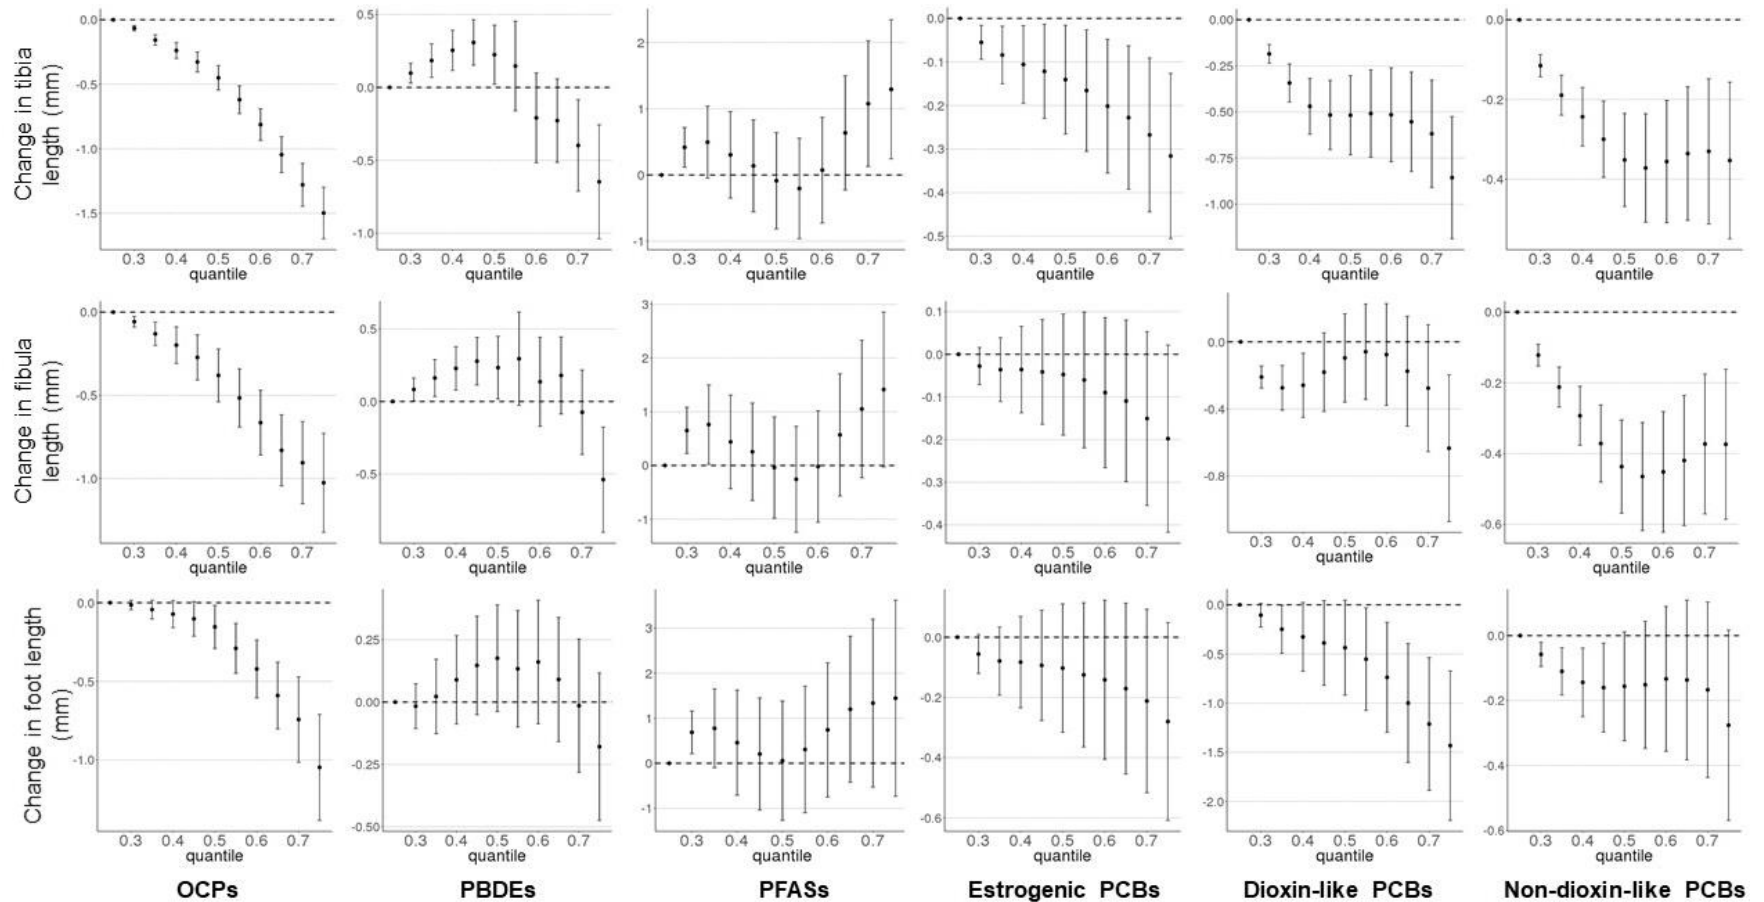

The dot corresponds to the estimate and the vertical lines correspond to the 95% confidence intervals. The dashed horizontal line represents the NULL. Adjusted for maternal race/ethnicity, maternal age, pre-pregnancy BMI, parity, highest level of education, marital status, infant sex, gestational age at the time of ultrasound, total plasma lipids (except for PFASs) and log transformed plasma cotinine level, with repeated measurements of fetal growth

**eFigure 5: Changes in cerebral width, inner orbit diameter and outer orbit diameter for each 5% increase (quantile) of POPs mixture exposure using the 25<sup>th</sup> percentiles as the reference point, NICHD Fetal Growth Studies – singletons (n=2,284).**

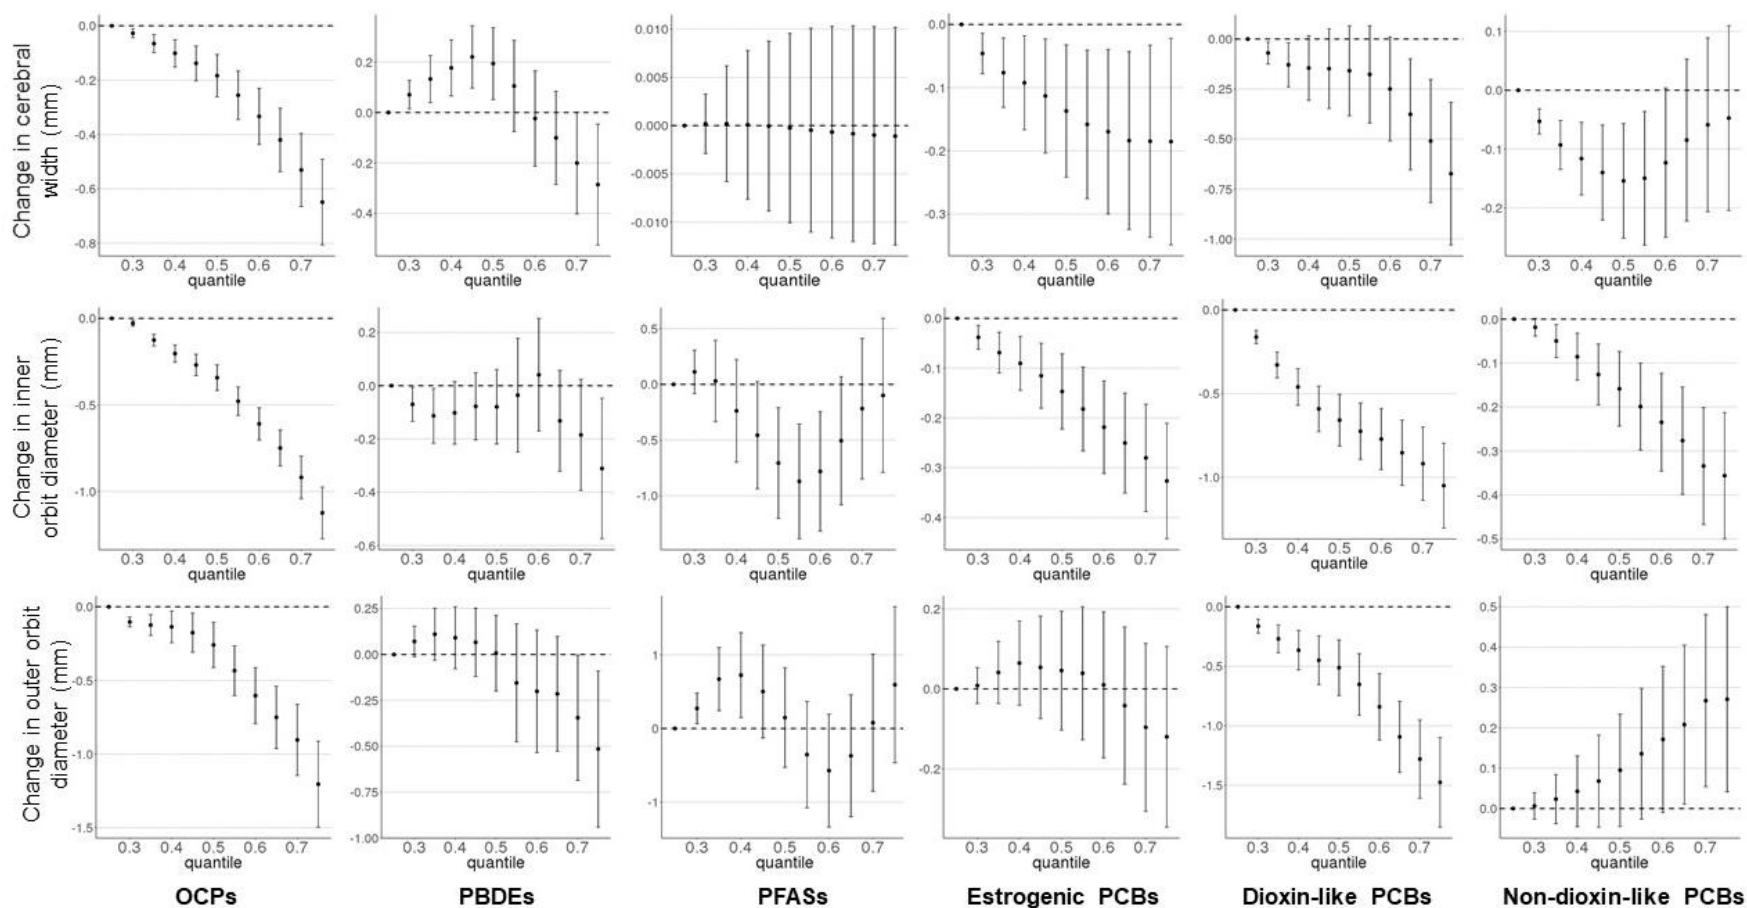

The dot corresponds to the estimate and the vertical lines correspond to the 95% confidence intervals. The dashed horizontal line represents the NULL. Adjusted for maternal race/ethnicity, maternal age, pre-pregnancy BMI, parity, highest level of education, marital status, infant sex, gestational age at the time of ultrasound, total plasma lipids (except for PFASs) and log transformed plasma cotinine level, with repeated measurements of fetal growth

**eFigure 6: Changes in estimated fetal weight for each 5% increase (quantile) of POPs mixture exposure using the 25<sup>th</sup> percentiles as the reference point, NICHD Fetal Growth Studies – singletons (n=2,284).**

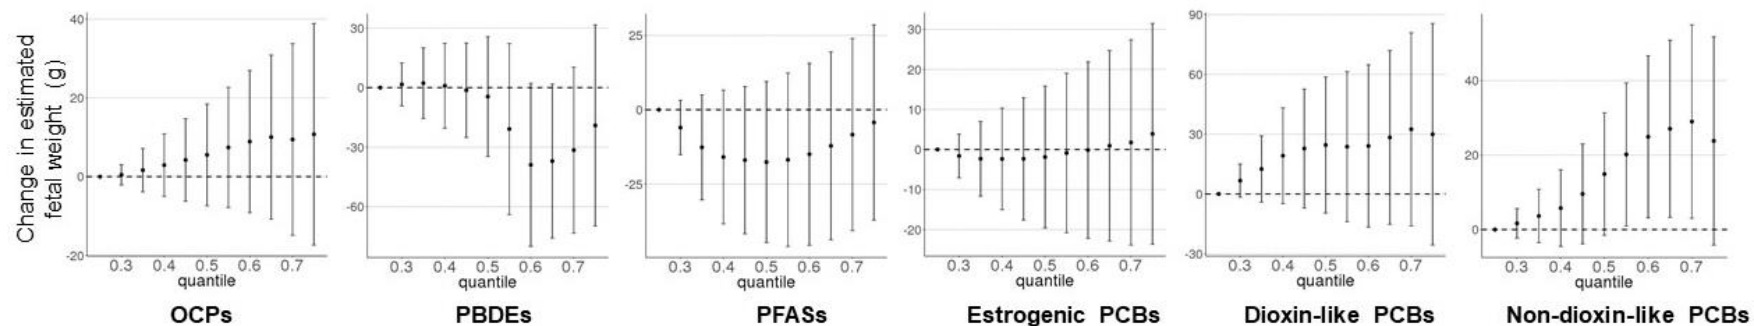

The dot corresponds to the estimate and the vertical lines correspond to the 95% confidence intervals. The dashed horizontal line represents the NULL. Adjusted for maternal race/ethnicity, maternal age, pre-pregnancy BMI, parity, highest level of education, marital status, infant sex, gestational age at the time of ultrasound, total plasma lipids (except for PFASs) and log transformed plasma cotinine level, with repeated measurements of fetal growth



**eFigure 7: Changes in longitudinal head circumference, abdominal circumference and femur length by fetal sex for each 5% increase (quantile) of POPs mixture exposure using the 25<sup>th</sup> percentiles as the reference point, NICHD Fetal Growth Studies – singletons (n=2,284).**

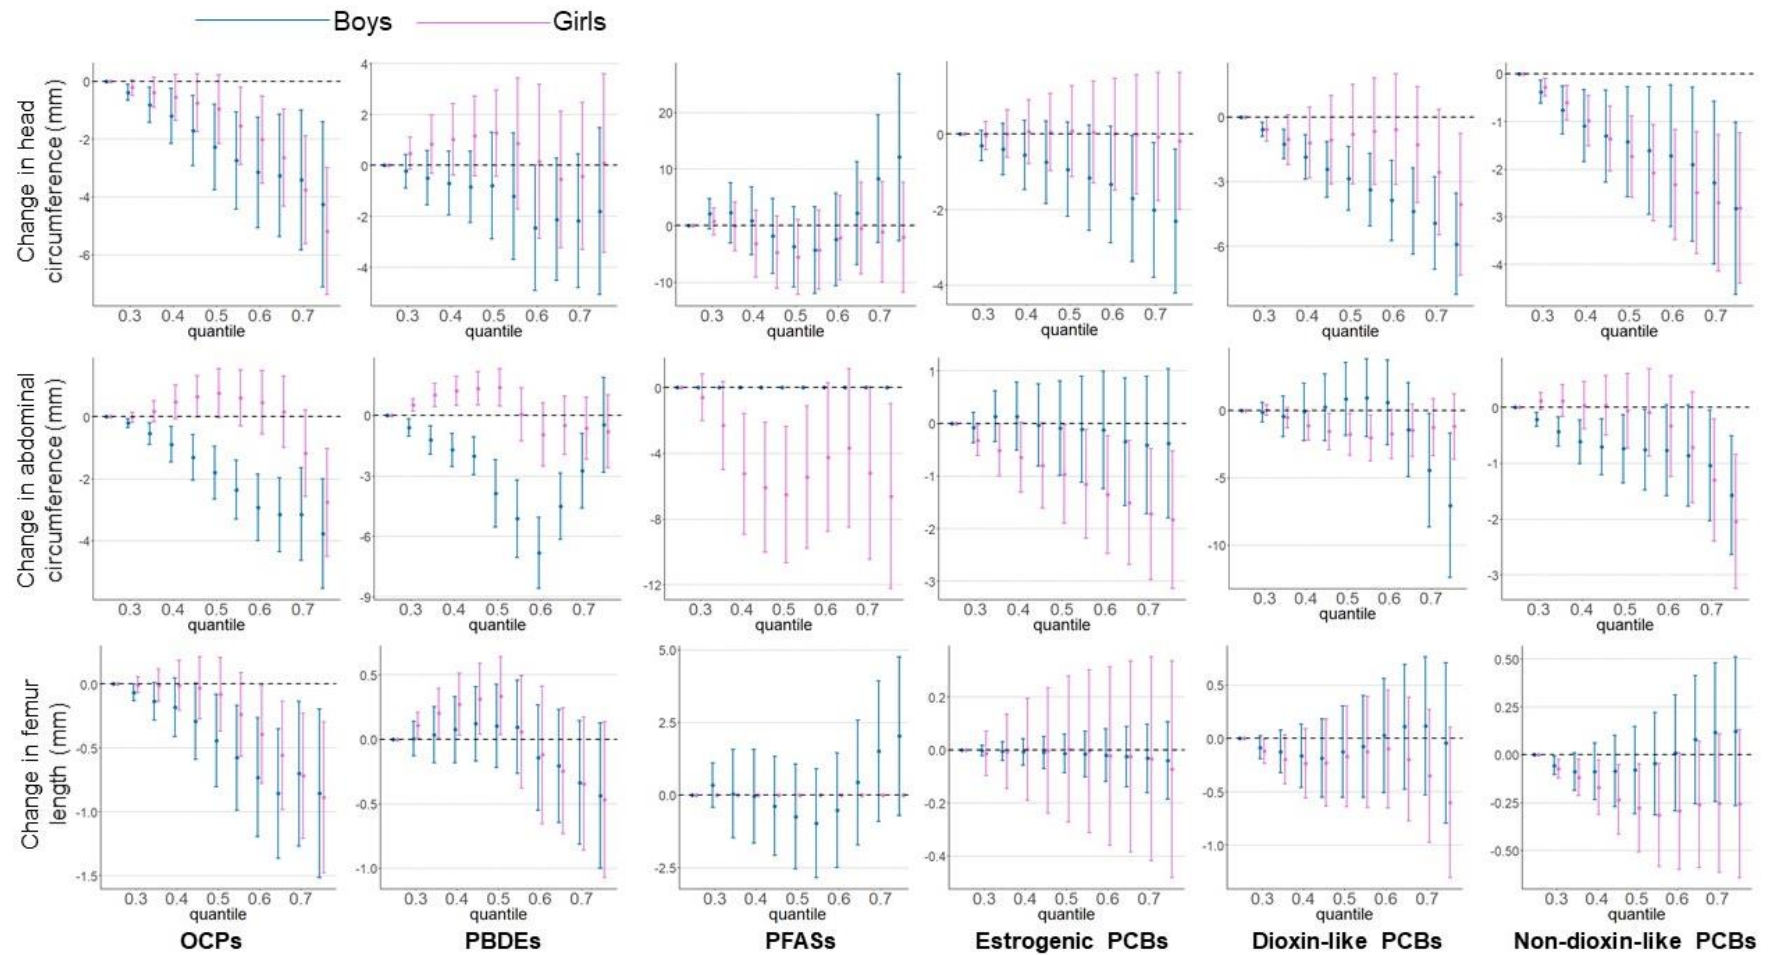

The dot corresponds to the estimate and the vertical lines correspond to the 95% confidence intervals. The dashed horizontal line represents the NULL. Adjusted for maternal race/ethnicity, maternal age, pre-pregnancy BMI, parity, highest level of education, marital status, infant sex, gestational age at the time of ultrasound, total plasma lipids (except for PFASs) and log transformed plasma cotinine level, with repeated measurements of fetal growth

**eFigure 8: Changes in longitudinal head circumference, abdominal circumference and femur length by maternal race/ethnicity for each 5% increase (quantile) of POPs mixture exposure using the 25<sup>th</sup> percentiles as the reference point, NICHD Fetal Growth Studies – singletons (n=2,284).**

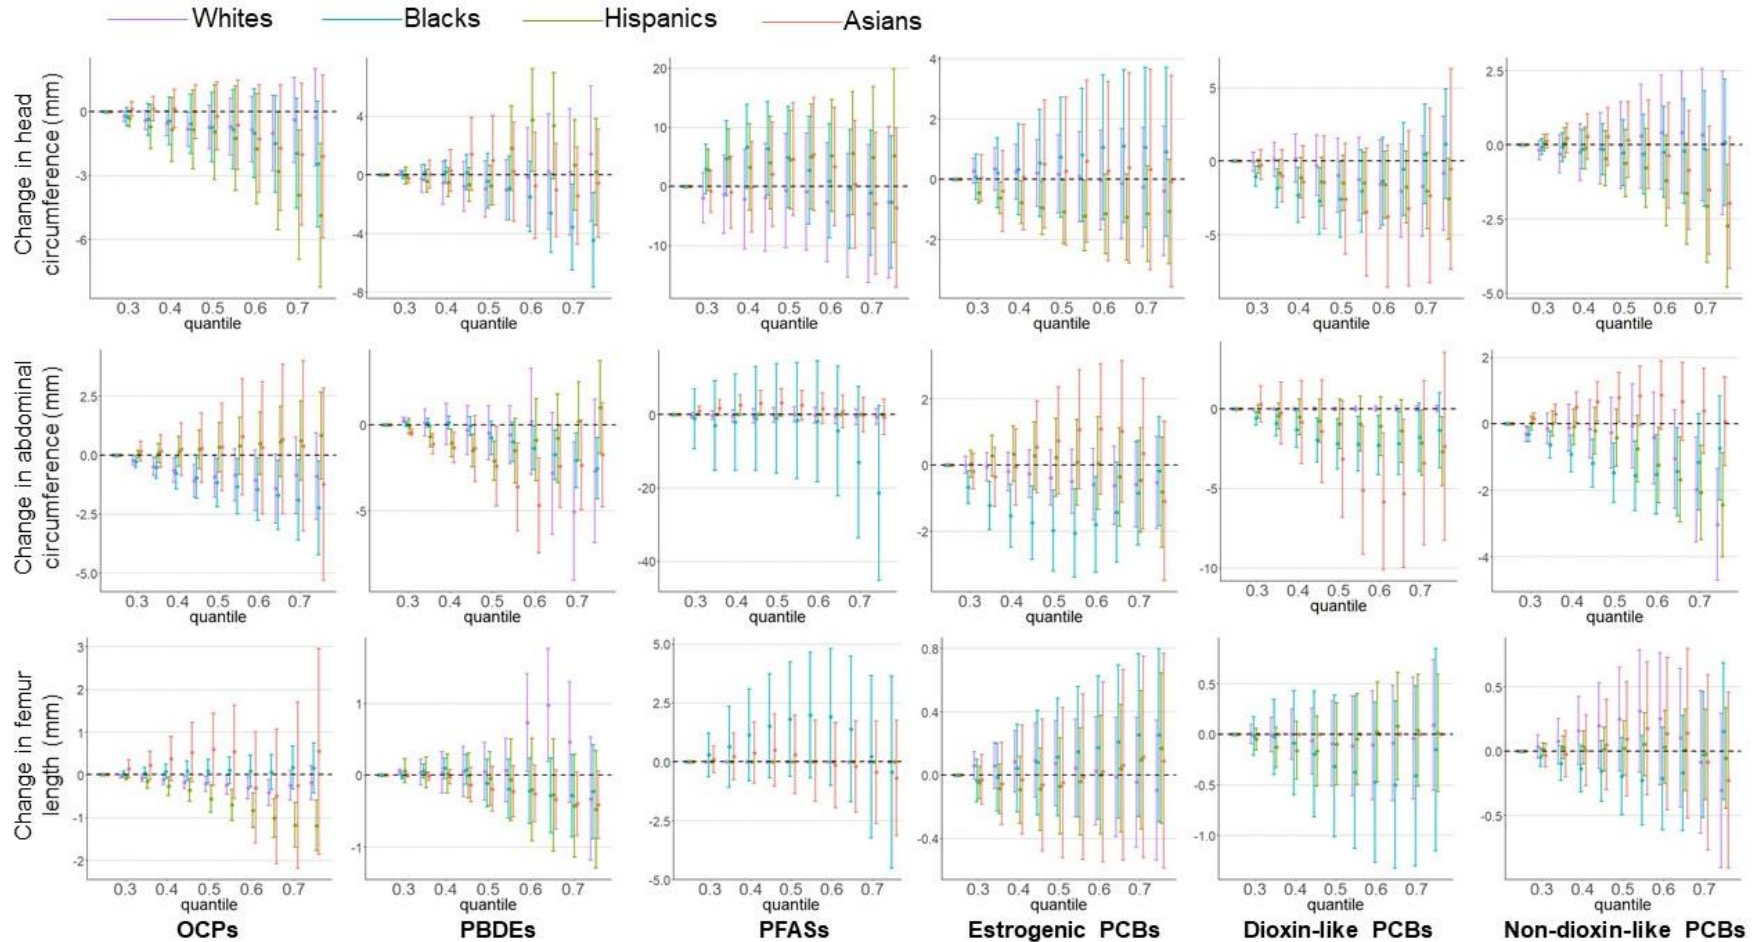

The dot corresponds to the estimate and the vertical lines correspond to the 95% confidence intervals. The dashed horizontal line represents the NULL. Adjusted for maternal race/ethnicity, maternal age, pre-pregnancy BMI, parity, highest level of education, marital status, infant sex, gestational age at the time of ultrasound, total plasma lipids (except for PFASs) and log transformed plasma cotinine level, with repeated measurements of fetal growth

**eTable 1: Comparison between the original cohort and the study population (pregnant women from the NICHD Fetal Growth Studies - Singletons). Note: Missing data in the study population have been imputed.**

|                                                        | Original cohort |              | Study population |              | Women excluded |              |
|--------------------------------------------------------|-----------------|--------------|------------------|--------------|----------------|--------------|
|                                                        | n=2,334         |              | n=2,284          |              | n=50           |              |
|                                                        | N               | mean ± sd    | N                | mean ± sd    | N              | mean ± sd    |
| <b>Gestational age at enrollment (weeks)</b>           | 2,333           | 12.7 ± 1.0   | 2,283            | 12.7 ± 1.0   | 50             | 12.7 ± 1.0   |
| <b>Maternal age at enrollment (years)</b>              | 2,334           | 28.2 ± 5.4   | 2,284            | 28.2 ± 5.5   | 50             | 28.0 ± 6.0   |
| <b>Pre-pregnancy maternal BMI (kg/m<sup>2</sup>)</b>   | 2,334           | 23.6 ± 3.1   | 2,284            | 23.6 ± 3.0   | 50             | 25.0 ± 4.7   |
| <b>Plasma cotinine level at enrollment (ng/mL)</b>     | 2,294           | 1.2 ± 14.4   | 2,284            | 1.3 ± 14.7   | 50             | 0.1 ± 0.4    |
| <b>Total plasma lipids level at enrollment (ng/mL)</b> | 2,272           | 608.8 ± 99.2 | 2,284            | 609.3 ± 99.4 | 50             | 598.2 ± 78.6 |
| <b>Gestational age at delivery (weeks)</b>             | 2,152           | 39.2 ± 1.9   | 2,139            | 39.2 ± 1.7   | 13             | 32.0 ± 8.4   |
|                                                        | <b>N</b>        | <b>%</b>     | <b>N</b>         | <b>%</b>     | <b>N</b>       | <b>%</b>     |
| <b>Highest level of education</b>                      |                 |              |                  |              |                |              |
| Less than high school                                  | 253             | 11           | 248              | 11           | 5              | 10           |
| High school diploma or GED or equivalent               | 404             | 17           | 394              | 17           | 10             | 20           |
| Some college or Associate degree                       | 683             | 29           | 664              | 29           | 19             | 38           |
| Bachelors degree                                       | 565             | 24           | 556              | 24           | 9              | 18           |
| Masters degree or Advanced degree                      | 428             | 18           | 422              | 18           | 7              | 14           |
| <b>Parity (live and still-births &gt; 20 GW)</b>       |                 |              |                  |              |                |              |
| 0                                                      | 1,149           | 49           | 1,128            | 49           | 21             | 42           |
| 1                                                      | 792             | 34           | 774              | 34           | 18             | 36           |
| 2                                                      | 279             | 12           | 274              | 12           | 5              | 10           |
| ≥3                                                     | 114             | 5            | 108              | 5            | 6              | 12           |
| <b>Marital Status</b>                                  |                 |              |                  |              |                |              |
| Not married                                            | 562             | 24           | 547              | 24           | 16             | 32           |
| Married or living as married                           | 1,769           | 76           | 1,737            | 76           | 34             | 68           |
| <b>Sex of infant</b>                                   |                 |              |                  |              |                |              |
| Male                                                   | 1,105           | 47           | 1,187            | 52           | 2              | 4            |
| Female                                                 | 1,025           | 44           | 1,097            | 48           | 8              | 16           |
| Missing                                                | 204             | 9            | 0                | 0            | 40             | 80           |

BMI: Body mass index

**eTable 2: Comparison of the POPs exposures (median (25<sup>th</sup>, 75<sup>th</sup> percentile) at enrollment between included and excluded pregnant women from the NICHD Fetal growth Studies - Singletons.**

| Chemical Class                                         | Overall<br>(n=2,284) |       |        | Women excluded<br>(n=50) |       |        | P-Value      |
|--------------------------------------------------------|----------------------|-------|--------|--------------------------|-------|--------|--------------|
|                                                        | median               | p25   | p75    | median                   | p25   | p75    |              |
| <b>Organochlorine pesticides (OCPs, ng/g)</b>          |                      |       |        |                          |       |        |              |
| β-HCH                                                  | 0                    | 0     | 4.51   | 0                        | 0     | 2.65   | 0.537        |
| γ-HCH                                                  | 0                    | 0     | 0      | 0                        | 0     | 0      | 0.897        |
| HCB                                                    | 7.09                 | 4.05  | 10.64  | 6.75                     | 4.16  | 10.66  | 0.779        |
| Oxychlorane                                            | 2.52                 | 0.75  | 4.41   | 2.08                     | 0     | 4.33   | 0.955        |
| Trans-chlordane                                        | 0                    | -0.86 | 1.2    | 0.02                     | -0.87 | 2.5    | 0.874        |
| Trans-nonachlor                                        | 4.57                 | 2.5   | 7.88   | 4.64                     | 2.3   | 6.79   | 0.836        |
| p,p'-DDE                                               | 83.14                | 52.34 | 170.68 | 73.43                    | 44.76 | 130.89 | 0.558        |
| o,p'-DDD                                               | 0                    | 0     | 0      | 0                        | 0     | 0      | 0.483        |
| p,p'-DDD                                               | 0                    | 0     | 0.5    | 0                        | 0     | 0.51   | 0.610        |
| p,p'-DDT                                               | 1.27                 | 0     | 2.71   | 1.62                     | 0.23  | 2.96   | 0.878        |
| Mirex                                                  | 0                    | 0     | 0.79   | 0                        | 0     | 0.71   | 0.444        |
| <b>Polybrominated biphenyl (PBB, ng/g)</b>             |                      |       |        |                          |       |        |              |
| PBB 153                                                | 0                    | 0     | 0      | 0                        | 0     | 0      | 0.571        |
| <b>Polychlorinated biphenyl congeners (PCBs, ng/g)</b> |                      |       |        |                          |       |        |              |
| <b>Di-CB</b>                                           |                      |       |        |                          |       |        |              |
| 5/8                                                    | 0                    | -0.6  | 0.53   | -0.07                    | -0.9  | 0.54   | 0.572        |
| <b>Tri-CB</b>                                          |                      |       |        |                          |       |        |              |
| 18/17                                                  | -0.08                | -0.96 | 0.77   | -0.11                    | -1.77 | 0.44   | 0.921        |
| 22                                                     | -0.05                | -0.23 | 0.11   | -0.09                    | -0.28 | 0.08   | 0.245        |
| 31/28                                                  | 0.44                 | -0.8  | 1.55   | 0.34                     | -1.29 | 1.35   | 0.289        |
| 33/20                                                  | -0.1                 | -0.44 | 0.19   | -0.15                    | -0.63 | 0.21   | 0.257        |
| 37                                                     | -0.04                | -0.16 | 0.08   | -0.02                    | -0.26 | 0.06   | 0.239        |
| <b>Tetra-CB</b>                                        |                      |       |        |                          |       |        |              |
| 41/64                                                  | -0.13                | -0.57 | 0.27   | -0.2                     | -0.69 | 0.24   | 0.351        |
| 44                                                     | -0.2                 | -0.65 | 0.2    | -0.26                    | -0.82 | 0.11   | 0.312        |
| 47/48/75                                               | 0.03                 | -0.24 | 0.26   | 0.07                     | -0.41 | 0.34   | 0.377        |
| 49/43                                                  | -0.12                | -0.47 | 0.15   | -0.22                    | -0.63 | 0.12   | 0.335        |
| 52/73                                                  | -0.37                | -1.55 | 0.64   | -0.54                    | -2.13 | 0.41   | 0.307        |
| 66/80                                                  | 0.25                 | -0.07 | 0.59   | 0.23                     | -0.16 | 0.57   | 0.423        |
| 70/76                                                  | -0.25                | -0.84 | 0.32   | -0.35                    | -1.19 | 0.44   | 0.477        |
| 74/61                                                  | 1.11                 | 0.52  | 1.92   | 0.93                     | 0.45  | 1.55   | 0.083        |
| <b>Penta-CB</b>                                        |                      |       |        |                          |       |        |              |
| 90/101/89                                              | -0.42                | -1.49 | 0.52   | -0.49                    | -1.91 | 0.19   | 0.490        |
| 93/95                                                  | -0.42                | -1.43 | 0.45   | -0.69                    | -1.98 | 0.18   | 0.312        |
| 99                                                     | 1.05                 | 0.47  | 1.86   | 1.16                     | 0.22  | 2.22   | 0.617        |
| 85/120                                                 | 0.02                 | -0.08 | 0.1    | -0.01                    | -0.12 | 0.11   | 0.773        |
| 110                                                    | -0.23                | -0.75 | 0.22   | -0.27                    | -0.86 | 0.2    | 0.659        |
| 118/106                                                | 1.93                 | 1     | 3.26   | 2.08                     | 0.98  | 3.3    | 0.439        |
| 105/127                                                | 0.6                  | 0.29  | 1.05   | 0.66                     | 0.3   | 1.24   | 0.448        |
| 114/122                                                | 0.13                 | 0.06  | 0.21   | 0.12                     | 0.03  | 0.19   | 0.087        |
| <b>Hexa-CB</b>                                         |                      |       |        |                          |       |        |              |
| 128                                                    | 0.11                 | 0     | 0.21   | 0.11                     | 0.02  | 0.22   | 0.398        |
| 137                                                    | 0.24                 | 0.11  | 0.43   | 0.18                     | 0.03  | 0.32   | <b>0.043</b> |
| 138/158                                                | 4.9                  | 2.84  | 8.24   | 4.65                     | 2.64  | 9.1    | 0.329        |

| Chemical Class                                                 | Overall<br>(n=2,284) |      |       | Women excluded<br>(n=50) |      |       | P-Value      |
|----------------------------------------------------------------|----------------------|------|-------|--------------------------|------|-------|--------------|
|                                                                | median               | p25  | p75   | median                   | p25  | p75   |              |
| 146/161                                                        | 0.58                 | 0.27 | 1.15  | 0.66                     | 0.18 | 1.22  | 0.575        |
| 153                                                            | 5.77                 | 3.2  | 10.25 | 6.05                     | 2.67 | 11.83 | 0.445        |
| 156                                                            | 0.6                  | 0.34 | 1.07  | 0.57                     | 0.33 | 0.9   | 0.091        |
| 157                                                            | 0.13                 | 0.07 | 0.25  | 0.12                     | 0.06 | 0.2   | 0.140        |
| 167                                                            | 0.21                 | 0.12 | 0.36  | 0.24                     | 0.12 | 0.37  | 0.559        |
| <b>Hepta-CB</b>                                                |                      |      |       |                          |      |       |              |
| 170                                                            | 1.37                 | 0.8  | 2.28  | 1.32                     | 0.65 | 2.12  | 0.342        |
| 172/192                                                        | 0.15                 | 0.05 | 0.32  | 0.14                     | 0    | 0.33  | 0.327        |
| 177                                                            | 0.24                 | 0.11 | 0.44  | 0.2                      | 0.05 | 0.47  | 0.431        |
| 180                                                            | 3.35                 | 1.93 | 5.76  | 3.24                     | 1.59 | 6.26  | 0.386        |
| 182/187                                                        | 1.24                 | 0.57 | 2.36  | 1.41                     | 0.66 | 2.58  | 0.692        |
| 183                                                            | 0.51                 | 0.28 | 0.86  | 0.55                     | 0.17 | 0.97  | 0.602        |
| <b>Octa-CB</b>                                                 |                      |      |       |                          |      |       |              |
| 194                                                            | 0.63                 | 0.35 | 1.07  | 0.6                      | 0.33 | 1.02  | 0.422        |
| 195                                                            | 0.17                 | 0.09 | 0.29  | 0.19                     | 0.11 | 0.29  | 0.590        |
| 196/203                                                        | 0.73                 | 0.4  | 1.23  | 0.76                     | 0.29 | 1.49  | 0.545        |
| 199                                                            | 0.63                 | 0.32 | 1.16  | 0.58                     | 0.24 | 1.23  | 0.460        |
| 202                                                            | 0.18                 | 0.07 | 0.35  | 0.18                     | 0.08 | 0.41  | 0.582        |
| <b>Nona-CB</b>                                                 |                      |      |       |                          |      |       |              |
| 206                                                            | 0.39                 | 0.21 | 0.67  | 0.35                     | 0.18 | 0.67  | 0.533        |
| 208                                                            | 0.15                 | 0.06 | 0.28  | 0.17                     | 0.07 | 0.28  | 0.745        |
| <b>Deca-CB</b>                                                 |                      |      |       |                          |      |       |              |
| 209                                                            | 0.28                 | 0.17 | 0.47  | 0.27                     | 0.17 | 0.48  | 0.869        |
| <b>Polybrominated diphenyl ethers (PBDEs, ng/g)</b>            |                      |      |       |                          |      |       |              |
| 28                                                             | 0                    | 0    | 1.09  | 0                        | 0    | 0.51  | 0.603        |
| 47                                                             | 8.84                 | 3.89 | 17.84 | 8.01                     | 3.44 | 20.01 | 0.082        |
| 85                                                             | 0                    | 0    | 0     | 0                        | 0    | 0     | <b>0.047</b> |
| 99                                                             | 2.17                 | 0    | 5.44  | 1.35                     | 0    | 7.48  | 0.090        |
| 100                                                            | 2.17                 | 0    | 4.45  | 1.94                     | 0    | 4.26  | 0.462        |
| 153                                                            | 0                    | 0    | 7.12  | 1.16                     | 0    | 13.2  | 0.400        |
| 154                                                            | 0.45                 | 0    | 2.86  | 0.79                     | 0    | 2.11  | 0.726        |
| 183                                                            | 0                    | 0    | 0     | 0                        | 0    | 0     | 0.791        |
| 209                                                            | 0                    | 0    | 0     | 0                        | 0    | 0     | 0.833        |
| <b>Poly-and-perfluorinated alkyl substances (PFASs, ng/mL)</b> |                      |      |       |                          |      |       |              |
| NMeFOSAA                                                       | 0.06                 | 0.03 | 0.12  | 0.07                     | 0.04 | 0.12  | 0.611        |
| PFDA                                                           | 0.25                 | 0.16 | 0.42  | 0.24                     | 0.17 | 0.36  | 0.778        |
| PFDoDA                                                         | 0.03                 | 0.01 | 0.05  | 0.03                     | 0.02 | 0.06  | 0.941        |
| PFDS                                                           | 0.01                 | 0    | 0.03  | 0.02                     | 0.01 | 0.03  | 0.095        |
| PFHpA                                                          | 0.02                 | 0.01 | 0.06  | 0.02                     | 0.01 | 0.07  | 0.964        |
| PFHxS                                                          | 0.71                 | 0.44 | 1.23  | 0.57                     | 0.36 | 1.2   | 0.320        |
| PFNA                                                           | 0.77                 | 0.54 | 1.17  | 0.74                     | 0.47 | 1.01  | 0.170        |
| PFOA                                                           | 2                    | 1.31 | 3.01  | 1.79                     | 0.97 | 2.62  | 0.318        |
| PFOS                                                           | 5.16                 | 3.39 | 7.98  | 5.26                     | 3.67 | 8.4   | 0.784        |
| PFOSA                                                          | 0                    | 0    | 0     | 0                        | 0    | 0     | 0.722        |
| PFUnDA                                                         | 0.19                 | 0.09 | 0.35  | 0.19                     | 0.11 | 0.31  | 0.651        |

NOTE: All POP concentrations were based upon machine measured concentrations without substitution of concentrations <LOQ. OCPs, PBB, PCBs and PPBDEs concentration are adjusted for total plasma lipids. Missing data have been imputed. P-values are from Kruskal-Wallis nonparametric test comparing the median.

**eTable 3: Organochlorine pesticides - Estimation of the contribution of individual chemical to the fetal growth changes when the chemical of interest changes from the 25<sup>th</sup> to the 75<sup>th</sup> percentile while all of the other chemicals in the mixture are fixed to their 25<sup>th</sup> percentile, NICHD Fetal Growth Studies – singletons (n=2,284).**

|                  | Head circumference |       | Abdominal circumference |       | Femur length |       |
|------------------|--------------------|-------|-------------------------|-------|--------------|-------|
|                  | est                | sd    | est                     | sd    | est          | sd    |
| β-HCH            | -0.789             | 0.709 | -0.668                  | 0.394 | 0.147        | 0.170 |
| γ-HCH            | 0.000              | 0.000 | 0.000                   | 0.000 | 0.000        | 0.000 |
| HCB              | 0.193              | 0.377 | -0.182                  | 0.249 | 0.142        | 0.134 |
| Oxychlorane      | 0.320              | 0.805 | -0.576                  | 0.389 | -0.435       | 0.227 |
| Trans-chlordane  | -0.007             | 0.090 | -0.015                  | 0.031 | 0.000        | 0.026 |
| Trans-nonachlor  | -0.594             | 1.008 | -1.184                  | 0.573 | -0.253       | 0.229 |
| <i>p,p'</i> -DDE | -0.710             | 1.655 | -1.056                  | 0.933 | 0.072        | 0.390 |
| <i>o,p'</i> -DDD | 0.000              | 0.000 | 0.000                   | 0.000 | 0.000        | 0.000 |
| <i>p,p'</i> -DDD | -1.004             | 0.715 | -0.213                  | 0.379 | 0.333        | 0.167 |
| <i>p,p'</i> -DDT | 1.944              | 1.324 | 0.363                   | 0.584 | -0.195       | 0.317 |
| Mirex            | -1.481             | 0.950 | -1.161                  | 0.633 | 0.101        | 0.230 |

Adjusted for maternal race/ethnicity, maternal age, pre-pregnancy BMI, parity, highest level of education, marital status, infant sex, gestational age at the time of ultrasound, total plasma lipids and log transformed plasma cotinine level, with repeated measurements of fetal growth.

**eTable 4: Polybrominated diphenyl ethers - Estimation of the contribution of individual chemical to the fetal growth changes when the chemical of interest changes from the 25<sup>th</sup> to the 75<sup>th</sup> percentile while all of the other chemicals in the mixture are fixed to their 25<sup>th</sup> percentile, NICHD Fetal Growth Studies – singletons (n=2,284).**

|     | Head circumference |       | Abdominal circumference |       | Femur length |       |
|-----|--------------------|-------|-------------------------|-------|--------------|-------|
|     | est                | sd    | est                     | sd    | est          | sd    |
| 28  | 3.132              | 1.824 | 2.505                   | 1.615 | -0.074       | 0.268 |
| 47  | -2.205             | 2.771 | -4.423                  | 1.970 | -0.528       | 0.345 |
| 85  | 0.000              | 0.000 | 0.000                   | 0.000 | 0.000        | 0.000 |
| 99  | 0.909              | 1.189 | 2.151                   | 0.883 | -0.046       | 0.203 |
| 100 | 6.389              | 4.353 | -3.506                  | 3.029 | -0.307       | 0.417 |
| 153 | 1.852              | 2.030 | 0.380                   | 1.711 | 0.096        | 0.317 |
| 154 | -0.193             | 1.655 | -0.632                  | 1.464 | -0.487       | 0.345 |
| 183 | 0.000              | 0.000 | 0.000                   | 0.000 | 0.000        | 0.000 |
| 209 | 0.000              | 0.000 | 0.000                   | 0.000 | 0.000        | 0.000 |

Adjusted for maternal race/ethnicity, maternal age, pre-pregnancy BMI, parity, highest level of education, marital status, infant sex, gestational age at the time of ultrasound, total plasma lipids and log transformed plasma cotinine level, with repeated measurements of fetal growth.

**eTable 5: Poly-and-perfluorinated alkyl substances - Estimation of the contribution of individual chemical to the fetal growth changes when the chemical of interest changes from the 25<sup>th</sup> to the 75<sup>th</sup> percentile while all of the other chemicals in the mixture are fixed to their 25<sup>th</sup> percentile, NICHD Fetal Growth Studies – singletons (n=2,284).**

|          | Head circumference |       | Abdominal circumference |       | Femur length |       |
|----------|--------------------|-------|-------------------------|-------|--------------|-------|
|          | est                | sd    | est                     | sd    | est          | sd    |
| NMeFOSAA | -0.247             | 1.089 | 0.032                   | 0.283 | -0.196       | 1.633 |
| PFDA     | 3.125              | 2.163 | 0.075                   | 0.228 | -0.094       | 2.220 |
| PFDoDA   | 0.476              | 1.219 | 0.026                   | 0.155 | -0.040       | 1.237 |
| PFDS     | -0.134             | 1.400 | 0.066                   | 0.273 | -0.044       | 1.914 |
| PFHpA    | -0.484             | 1.758 | 0.022                   | 0.261 | 0.455        | 1.676 |
| PFHxS    | 0.307              | 1.375 | -0.033                  | 0.390 | -0.715       | 2.149 |
| PFNA     | 1.591              | 1.989 | 0.096                   | 0.286 | 0.857        | 2.375 |
| PFOA     | 1.626              | 1.837 | 0.090                   | 0.360 | 0.737        | 2.353 |
| PFOS     | 1.455              | 1.907 | 0.131                   | 0.397 | 0.515        | 2.350 |
| PFOSA    | 0.278              | 0.884 | 0.026                   | 0.195 | 1.400        | 1.402 |
| PFUnDA   | 0.581              | 1.447 | 0.103                   | 0.289 | -1.035       | 2.154 |

Adjusted for maternal race/ethnicity, maternal age, pre-pregnancy BMI, parity, highest level of education, marital status, infant sex, gestational age at the time of ultrasound and log transformed plasma cotinine level, with repeated measurements of fetal growth.



**eTable 6: Polychlorinated biphenyl congeners - Estimation of the contribution of individual chemical to the fetal growth changes when the chemical of interest changes from the 25<sup>th</sup> to the 75<sup>th</sup> percentile while all of the other chemicals in the mixture are fixed to their 25<sup>th</sup> percentile, NICHD Fetal Growth Studies – singletons (n=2,284).**

|                               | Head circumference |       | Abdominal circumference |       | Femur length |       |
|-------------------------------|--------------------|-------|-------------------------|-------|--------------|-------|
|                               | est                | sd    | est                     | sd    | est          | sd    |
| <b>Potentially estrogenic</b> |                    |       |                         |       |              |       |
| 31/28                         | -0.245             | 1.692 | 2.108                   | 1.246 | -0.188       | 0.395 |
| 44                            | 2.852              | 2.822 | -0.615                  | 1.312 | -0.064       | 0.782 |
| 49/43                         | 4.888              | 2.759 | 3.918                   | 1.940 | 0.578        | 0.624 |
| 52/73                         | -1.064             | 1.933 | 0.460                   | 1.220 | -0.234       | 0.311 |
| 70/76                         | -0.068             | 1.766 | -0.297                  | 1.503 | -0.195       | 0.498 |
| 90/101/89                     | -0.561             | 1.758 | -0.793                  | 1.310 | -0.468       | 0.438 |
| 182/187                       | -1.629             | 1.559 | -5.205                  | 1.204 | -0.384       | 0.297 |
| 177                           | -2.418             | 1.549 | -4.701                  | 1.223 | -0.596       | 0.324 |
| <b>Dioxin-like</b>            |                    |       |                         |       |              |       |
| 66/80                         | -0.437             | 1.397 | -2.473                  | 1.340 | -0.253       | 0.459 |
| 74/61                         | 3.758              | 2.473 | 3.927                   | 1.653 | 0.069        | 0.717 |
| 105/127                       | -0.992             | 2.294 | -1.198                  | 2.312 | 0.235        | 0.910 |
| 118/106                       | 0.935              | 2.858 | 0.314                   | 2.095 | 0.226        | 0.854 |
| 156                           | -0.822             | 3.371 | 2.638                   | 1.885 | -0.128       | 0.994 |
| 167                           | -5.158             | 2.716 | 3.491                   | 1.637 | -0.411       | 0.763 |
| 128                           | -0.521             | 1.136 | -1.149                  | 1.333 | 0.186        | 0.342 |
| 138/158                       | 5.620              | 3.358 | 2.683                   | 2.759 | 0.960        | 1.187 |
| 170                           | 2.275              | 2.671 | -0.855                  | 1.961 | 0.878        | 0.790 |
| <b>Non-dioxin like</b>        |                    |       |                         |       |              |       |
| 99                            | -2.785             | 1.326 | -0.470                  | 0.516 | -0.165       | 0.216 |
| 153                           | 2.520              | 2.537 | -1.552                  | 2.043 | -0.098       | 0.455 |
| 180                           | -3.238             | 3.523 | -4.415                  | 2.064 | -0.311       | 0.544 |
| 196/203                       | -0.842             | 1.957 | -0.823                  | 1.019 | 0.000        | 0.367 |
| 183                           | 0.574              | 1.725 | -0.421                  | 0.845 | 0.798        | 0.330 |

Adjusted for maternal race/ethnicity, maternal age, pre-pregnancy BMI, parity, highest level of education, marital status, infant sex, gestational age at the time of ultrasound, total plasma lipids and log transformed plasma cotinine level, with repeated measurements of fetal growth.

**eTable 7: Association between EDCs and longitudinal head circumference using a generalized additive mixed model, NICHD Fetal Growth Studies – Singletons (n=2,284).**

| Chemicals       | Overall<br>(n=2,284) |     |     | Interaction by infant sex |     |     |            |     |     | Interaction by maternal race/ethnicity group |        |     |     |        |     |     |           |    |     |        |     |     |                  |
|-----------------|----------------------|-----|-----|---------------------------|-----|-----|------------|-----|-----|----------------------------------------------|--------|-----|-----|--------|-----|-----|-----------|----|-----|--------|-----|-----|------------------|
|                 | beta                 | p   | FDR | Boys Only                 |     |     | Girls Only |     |     | P <sub>int</sub>                             | Whites |     |     | Blacks |     |     | Hispanics |    |     | Asians |     |     | P <sub>int</sub> |
|                 |                      |     |     | beta                      | p   | FDR | beta       | p   | FDR |                                              | beta   | p   | FDR | beta   | p   | FDR | beta      | p  | FDR | beta   | p   | FDR |                  |
| β-HCH           | 0.13                 |     |     | 0.12                      |     |     | 0.14       |     |     | 0.878                                        | -1.48  |     |     | 4.16   | **  | .   | -1.81     | ** |     | 0.18   | .   |     | <0.001           |
| γ-HCH           | 0.03                 |     |     | 0.04                      |     |     | 0.00       |     |     | 0.869                                        | 8.04   |     |     | -0.12  |     |     | 4.19      |    |     | 0.03   |     |     | 0.483            |
| HCB             | -0.11                |     |     | -0.13                     |     |     | 1.30       | .   |     | 0.052                                        | -1.33  |     |     | 1.93   | .   |     | 0.09      |    |     | -0.12  |     |     | 0.336            |
| Oxychlorane     | 0.00                 |     |     | -2.50                     | *   |     | 0.03       |     |     | 0.039                                        | -4.30  | **  |     | -0.44  |     |     | -2.55     |    |     | 0.04   |     |     | 0.044            |
| Trans-chlordane | -0.10                |     |     | -0.19                     |     |     | 0.11       |     |     | 0.189                                        | 5.79   |     |     | 12.09  | *** | **  | 4.14      |    |     | -0.12  |     |     | <0.001           |
| Trans-nonachlor | 0.03                 |     |     | -0.76                     | .   |     | 0.09       |     |     | 0.071                                        | -1.40  | *   |     | 1.19   | *   |     | -0.12     |    |     | 0.05   |     |     | 0.025            |
| p,p'-DDE        | -0.35                | *** | .   | -0.41                     | **  | *   | -0.29      | *   |     | 0.535                                        | -3.28  | *** | *** | 0.16   |     |     | -0.37     | *  |     | -0.02  |     |     | <0.001           |
| o,p'-DDD        | 0.15                 | .   |     | 0.46                      | **  | *   | -0.04      |     |     | 0.005                                        | 0.13   |     |     | 0.16   |     |     | 0.40      | *  |     | 0.03   |     |     | 0.453            |
| p,p'-DDD        | 0.09                 |     |     | 0.08                      |     |     | 0.09       |     |     | 0.953                                        | 0.50   |     |     | 0.12   |     |     | 0.09      |    |     | 0.04   |     |     | 0.798            |
| p,p'-DDT        | 0.11                 |     |     | 0.11                      |     |     | 0.10       |     |     | 0.971                                        | -1.20  |     |     | 0.22   |     |     | 0.11      |    |     | 0.11   |     |     | 0.770            |
| Mirex           | -0.16                | .   |     | -0.31                     | *   | .   | 0.01       |     |     | 0.081                                        | -0.22  |     |     | -0.03  |     |     | -0.23     | .  |     | -0.02  |     |     | 0.780            |
| PBB 153         | 0.26                 | **  | .   | 0.39                      | *** | **  | -0.11      |     |     | 0.006                                        | 0.09   |     |     | 0.20   |     |     | 0.34      |    |     | 0.34   | **  |     | 0.540            |
| PBDE 28         | -0.03                |     |     | 0.02                      |     |     | -0.38      | .   |     | 0.080                                        | -3.05  | *** | *** | 0.08   |     |     | 0.11      |    |     | 0.05   |     |     | <0.001           |
| PBDE 47         | -0.17                | .   |     | -0.03                     |     |     | -0.30      | *   |     | 0.127                                        | -0.58  | *** | .   | 0.19   |     |     | 0.19      |    |     | -0.43  | *   |     | 0.002            |
| PBDE 85         | -0.15                | .   |     | -0.14                     |     |     | -0.19      |     |     | 0.820                                        | -0.12  |     |     | 0.33   |     |     | -0.07     |    |     | -1.58  | *** | *** | <0.001           |
| PBDE 99         | -0.05                |     |     | -0.03                     |     |     | -0.10      |     |     | 0.727                                        | -0.15  |     |     | 0.17   |     |     | -0.08     |    |     | -0.55  | *   |     | 0.073            |
| PBDE 100        | -0.28                | **  | .   | -0.19                     |     |     | -0.38      | **  |     | 0.249                                        | -0.89  | *** | *** | -0.10  |     |     | 0.23      |    |     | -0.90  | *** | *   | <0.001           |
| PBDE 153        | -0.19                | *   |     | 0.02                      |     |     | -0.38      | **  |     | 0.026                                        | -0.49  | *** | *   | 0.19   |     |     | 0.58      | .  |     | -0.43  |     |     | <0.001           |
| PBDE 154        | -0.34                | *** | *   | -0.34                     | **  | *   | -0.33      | *   |     | 0.987                                        | -0.38  | *   |     | -0.44  | *   |     | -0.30     | *  |     | -0.20  |     |     | 0.853            |
| PBDE 183        | 0.01                 |     |     | 0.06                      |     |     | -0.09      |     |     | 0.377                                        | -0.05  |     |     | 0.75   |     |     | -0.05     |    |     | -0.05  |     |     | 0.014            |
| PBDE 209        | -0.24                | **  |     | -0.07                     |     |     | -0.46      | *** | *   | 0.024                                        | -0.07  |     |     | -0.46  |     |     | -0.07     |    |     | -0.07  |     |     | 0.002            |
| PCB 5/8         | 0.06                 |     |     | 0.18                      |     |     | -0.03      |     |     | 0.347                                        | -1.20  |     |     | 0.89   | **  | .   | 0.00      |    |     | -0.07  |     |     | 0.016            |
| PCB 18/17       | 0.15                 | .   |     | 0.16                      | *   |     | -0.21      |     |     | 0.697                                        | 0.15   | .   |     | 5.27   | *** | *   | -1.65     |    |     | -5.09  |     |     | 0.002            |
| PCB 22          | 0.11                 |     |     | 0.14                      |     |     | 0.09       |     |     | 0.802                                        | -0.07  |     |     | 1.14   | *** | **  | -0.03     |    |     | -0.10  |     |     | <0.001           |
| PCB 31/28       | 0.14                 |     |     | 0.21                      | .   |     | 0.04       |     |     | 0.390                                        | -0.49  |     |     | 1.00   | *** | **  | -0.03     |    |     | 0.35   | .   |     | <0.001           |
| PCB 33/20       | 0.07                 |     |     | 0.11                      |     |     | 0.05       |     |     | 0.773                                        | -0.28  |     |     | 1.15   | *** | **  | -0.02     |    |     | -0.25  |     |     | <0.001           |
| PCB 37          | 0.16                 |     |     | 0.20                      |     |     | 0.13       |     |     | 0.704                                        | 0.00   |     |     | 1.00   | *** | **  | 0.04      |    |     | -0.12  |     |     | 0.003            |
| PCB 41/64       | 0.13                 |     |     | 0.52                      | **  | .   | -0.03      |     |     | 0.026                                        | -0.16  |     |     | 0.71   | *** | *   | -0.20     |    |     | -0.04  |     |     | 0.013            |
| PCB 44          | 0.08                 |     |     | 0.50                      | *   | .   | -0.10      |     |     | 0.014                                        | -0.15  |     |     | 0.67   | **  | *   | -0.38     |    |     | -0.06  |     |     | 0.006            |
| PCB 47/48/75    | 0.08                 |     |     | 0.49                      | *   | .   | -0.07      |     |     | 0.019                                        | -0.23  |     |     | 0.55   | **  | .   | -0.46     | .  |     | 0.01   |     |     | 0.010            |
| PCB 49/43       | 0.07                 |     |     | 0.42                      | *   |     | -0.09      |     |     | 0.029                                        | -0.26  |     |     | 0.62   | **  | *   | -0.29     |    |     | -0.07  |     |     | 0.009            |
| PCB 52/73       | 0.02                 |     |     | 0.42                      |     |     | -0.05      |     |     | 0.174                                        | -0.97  |     |     | 0.74   | *   |     | -0.37     |    |     | -0.01  |     |     | 0.039            |
| PCB 66/80       | 0.18                 | .   |     | 0.52                      | *** | **  | -0.09      |     |     | 0.002                                        | -0.13  |     |     | 0.61   | **  | *   | -0.01     |    |     | 0.09   |     |     | 0.060            |
| PCB 70/76       | 0.14                 |     |     | 0.40                      | *   | .   | -0.04      |     |     | 0.040                                        | -0.23  |     |     | 0.69   | *** | *   | -0.06     |    |     | -0.07  |     |     | 0.009            |
| PCB 74/61       | 0.01                 |     |     | 0.27                      | *   |     | -0.30      | *   |     | 0.004                                        | -0.32  |     |     | 0.36   |     |     | -0.49     | .  |     | 0.25   | .   |     | 0.013            |
| PCB 90/101/89   | 0.08                 |     |     | 0.61                      | *   |     | -0.05      |     |     | 0.031                                        | 0.06   |     |     | 0.70   | **  |     | -0.55     |    |     | 0.00   |     |     | 0.043            |
| PCB 93/95       | 0.06                 |     |     | 1.43                      | *   |     | 0.00       |     |     | 0.044                                        | -0.23  |     |     | 1.88   | *   |     | -1.72     | .  |     | 0.03   |     |     | 0.022            |
| PCB 99          | 0.00                 |     |     | 0.46                      | .   |     | -0.10      |     |     | 0.062                                        | 0.10   |     |     | 0.39   |     |     | -0.40     |    |     | -0.05  |     |     | 0.550            |
| PCB 85/120      | 0.23                 | *   |     | 0.64                      | *** | **  | 0.00       |     |     | 0.005                                        | 0.40   |     |     | 0.47   | *   |     | 0.31      |    |     | -0.01  |     |     | 0.304            |
| PCB 110         | 0.13                 |     |     | 0.67                      | **  | *   | -0.06      |     |     | 0.007                                        | 0.15   |     |     | 0.69   | **  | .   | -0.25     |    |     | -0.01  |     |     | 0.067            |

| Chemicals   | Overall<br>(n=2,284) |     |     | Interaction by infant sex |     |     |            |     |     | Interaction by maternal race/ethnicity group |        |     |     |        |    |     |           |     |     |        |     |     |                  |
|-------------|----------------------|-----|-----|---------------------------|-----|-----|------------|-----|-----|----------------------------------------------|--------|-----|-----|--------|----|-----|-----------|-----|-----|--------|-----|-----|------------------|
|             | beta                 | p   | FDR | Boys Only                 |     |     | Girls Only |     |     | P <sub>int</sub>                             | Whites |     |     | Blacks |    |     | Hispanics |     |     | Asians |     |     | P <sub>int</sub> |
|             |                      |     |     | beta                      | p   | FDR | beta       | p   | FDR |                                              | beta   | p   | FDR | beta   | p  | FDR | beta      | p   | FDR | beta   | p   | FDR |                  |
| PCB 118/106 | -0.11                |     |     | 0.24                      |     |     | -0.32      | *   |     | 0.009                                        | 0.11   |     |     | 0.09   |    |     | -0.74     | *   |     | -0.19  |     |     | 0.106            |
| PCB 105/127 | -0.04                |     |     | 0.29                      |     |     | -0.22      |     |     | 0.019                                        | 0.14   |     |     | 0.19   |    |     | -0.45     |     |     | -0.14  |     |     | 0.314            |
| PCB 114/122 | -0.08                |     |     | 0.17                      |     |     | -0.21      |     |     | 0.054                                        | 0.00   |     |     | -0.01  |    |     | -0.71     | *   |     | 0.04   |     |     | 0.195            |
| PCB 128     | -0.27                | **  |     | -0.15                     |     |     | -0.39      | **  |     | 0.200                                        | -0.27  |     |     | -0.26  |    |     | -0.26     |     |     | -0.26  |     |     | 1.000            |
| PCB 137     | -0.14                |     |     | 0.16                      |     |     | -0.32      | *   |     | 0.031                                        | 0.01   |     |     | -0.04  |    |     | -0.64     | *   |     | -0.16  |     |     | 0.327            |
| PCB 138/158 | -0.25                | *   |     | -0.03                     |     |     | -0.43      | **  |     | 0.058                                        | -0.26  |     |     | -0.02  |    |     | -0.10     |     |     | -0.35  | *   |     | 0.804            |
| PCB 146/161 | -0.11                |     |     | 0.21                      |     |     | -0.38      | *   |     | 0.007                                        | -0.06  |     |     | 0.55   | *  |     | -0.03     |     |     | -0.37  | *   |     | 0.045            |
| PCB 153     | -0.18                |     |     | 0.06                      |     |     | -0.38      | **  |     | 0.034                                        | -0.30  |     |     | 0.41   |    |     | 0.44      |     |     | -0.35  | *   |     | 0.059            |
| PCB 156     | -0.14                |     |     | 0.04                      |     |     | -0.42      | **  |     | 0.015                                        | -0.07  |     |     | -0.18  |    |     | -0.12     |     |     | -0.38  |     |     | 0.742            |
| PCB 157     | -0.36                | *** | *   | -0.07                     |     |     | -0.82      | *** | *** | <0.001                                       | -0.09  |     |     | -0.73  | ** |     | -0.93     | *** | *   | -0.50  | *   |     | 0.015            |
| PCB 167     | -0.41                | *** | *   | -0.17                     |     |     | -0.66      | *** | **  | 0.016                                        | -0.18  |     |     | -0.56  |    |     | -1.05     | *** | *   | -0.37  | *   |     | 0.093            |
| PCB 170     | -0.13                |     |     | -0.05                     |     |     | -0.34      |     |     | 0.178                                        | -0.25  | *   |     | 0.98   | *  |     | 1.30      | *** | *   | -0.39  |     |     | <0.001           |
| PCB 172/192 | -0.16                |     |     | -0.02                     |     |     | -0.42      | *   |     | 0.061                                        | -0.36  | *   |     | 0.81   | *  |     | 0.21      |     |     | -0.29  |     |     | 0.006            |
| PCB 177     | -0.16                |     |     | -0.06                     |     |     | -0.25      |     |     | 0.416                                        | -0.17  |     |     | 0.56   |    |     | 0.31      |     |     | -0.38  | *   |     | 0.068            |
| PCB 180     | -0.11                |     |     | 0.00                      |     |     | -0.37      | *   |     | 0.074                                        | -0.28  | *   |     | 0.89   | *  |     | 1.24      | *** | *   | -0.28  |     |     | <0.001           |
| PCB 182/187 | 0.01                 |     |     | 0.30                      |     |     | -0.11      |     |     | 0.123                                        | -0.01  |     |     | 1.28   | ** |     | 0.34      |     |     | -0.14  |     |     | 0.026            |
| PCB 183     | -0.08                |     |     | 0.05                      |     |     | -0.20      |     |     | 0.266                                        | -0.28  |     |     | 0.94   | ** |     | 0.34      |     |     | -0.17  |     |     | 0.020            |
| PCB 194     | -0.18                |     |     | -0.08                     |     |     | -0.55      | **  |     | 0.035                                        | -0.28  | *   |     | 0.57   |    |     | 2.09      | *** | **  | -0.33  |     |     | <0.001           |
| PCB 195     | -0.11                |     |     | -0.06                     |     |     | -0.22      |     |     | 0.480                                        | -0.29  | *   |     | 1.06   | *  |     | 1.76      | *** | *   | -0.19  |     |     | <0.001           |
| PCB 196/203 | -0.29                | **  |     | -0.14                     |     |     | -0.57      | *** | *   | 0.034                                        | -0.42  | **  |     | 0.15   |    |     | 1.44      | **  |     | -0.33  |     |     | 0.002            |
| PCB 199     | -0.26                | *   |     | -0.11                     |     |     | -0.52      | **  |     | 0.043                                        | -0.43  | **  |     | 0.13   |    |     | 0.67      |     |     | -0.25  |     |     | 0.093            |
| PCB 202     | -0.10                |     |     | 0.23                      |     |     | -0.27      |     |     | 0.043                                        | -0.31  |     |     | 0.49   |    |     | 0.28      |     |     | -0.18  |     |     | 0.229            |
| PCB 206     | -0.21                |     |     | -0.07                     |     |     | -0.41      | *   |     | 0.162                                        | -0.50  | *   |     | 0.47   |    |     | 0.80      |     |     | -0.45  | *   |     | 0.003            |
| PCB 208     | -0.40                | **  |     | -0.08                     |     |     | -0.77      | *** | **  | 0.009                                        | -0.77  | **  |     | -0.43  |    |     | 0.59      |     |     | -0.44  | *   |     | 0.061            |
| PCB 209     | 0.25                 |     |     | 0.82                      | *** | **  | -0.16      |     |     | 0.000                                        | -0.14  |     |     | 0.21   |    |     | 0.93      | **  |     | 0.16   |     |     | 0.113            |
| NMeFOSAA    | -0.19                |     |     | -0.08                     |     |     | -0.29      | *   |     | 0.250                                        | -0.36  |     |     | -0.02  |    |     | -0.64     | *** | *   | 0.28   |     |     | 0.008            |
| PFDA        | 0.21                 | *   |     | 0.26                      |     |     | 0.18       |     |     | 0.712                                        | 0.37   | *   |     | -0.04  |    |     | 0.42      |     |     | 0.18   |     |     | 0.247            |
| PFDoDA      | 0.18                 | *   |     | 0.30                      |     |     | 0.15       |     |     | 0.455                                        | 0.73   | **  |     | 0.35   |    |     | -0.08     |     |     | 0.42   |     |     | 0.020            |
| PFDS        | -0.27                | **  |     | -0.20                     |     |     | -0.34      | *   |     | 0.450                                        | -0.15  |     |     | -0.48  | ** |     | -0.65     |     |     | -0.06  |     |     | 0.173            |
| PFHpA       | 0.39                 | *** | **  | 0.31                      | *   |     | 0.46       | *** | *   | 0.406                                        | 0.48   | **  |     | 0.48   | *  |     | 0.34      | *   |     | 0.22   |     |     | 0.731            |
| PFHxS       | -0.22                | *   |     | -0.28                     | *   |     | -0.16      |     |     | 0.498                                        | -0.21  |     |     | -0.58  | ** | *   | -0.08     |     |     | 0.41   |     |     | 0.017            |
| PFNA        | 0.11                 |     |     | 0.08                      |     |     | 0.14       |     |     | 0.749                                        | 0.28   |     |     | -0.01  |    |     | 0.14      |     |     | 0.04   |     |     | 0.680            |
| PFOA        | 0.08                 |     |     | -0.04                     |     |     | 0.19       |     |     | 0.227                                        | -0.04  |     |     | -0.01  |    |     | 0.17      |     |     | 0.29   |     |     | 0.581            |
| PFOS        | -0.27                | **  |     | -0.07                     |     |     | -0.47      | *** | *   | 0.029                                        | -0.30  |     |     | -0.35  |    |     | -0.20     |     |     | -0.20  |     |     | 0.908            |
| PFOSA       | -0.15                |     |     | 0.09                      |     |     | -0.52      | *** | *   | <0.001                                       | -0.96  | *** | *** | -0.27  |    |     | -0.25     |     |     | 0.51   | **  |     | 0.000            |
| PFUnDA      | 0.32                 | **  |     | 0.37                      | **  |     | 0.29       | *   |     | 0.633                                        | 0.49   |     |     | 0.13   |    |     | 0.08      |     |     | 0.58   | *** |     | 0.201            |

P-values: \*\*\*<0.001 ; \*\*0.001-0.01 ; \*<0.01-0.05 ; . 0.05-0.1

FDR: p-values after false discovery rate correction (\*\*\*<0.001 ; \*\*0.001-0.01 ; \*<0.01-0.05 ; . 0.05-0.1)

P<sub>int</sub>: p-values of interaction

Adjusted for maternal race/ethnicity (White, Black, Hispanic, Asian), maternal age (years, continuous), pre-pregnancy BMI (kg/m<sup>2</sup>, continuous), parity (0,1,2, 3 or more), highest level of education (Less than high school, High school diploma or GED or equivalent, Some college or Associate degree, Bachelors degree, Masters degree or Advanced degree), marital status (not married vs. living as married), infant sex (male, female), gestational age at the time of ultrasound (continuous), total serum lipids (except for PFASs, ng/mL, continuous) and log transformed plasma cotinine level (log(x+1), continuous), with repeated measurements of fetal growth (random effect variable corresponding to the mother-child pair), and with a smooth function for the gestational age.

**eTable 8: Association between EDCs and longitudinal biparietal diameter using a generalized additive mixed model, NICHD Fetal Growth Studies – Singletons (n=2,284).**

| Chemicals       | Overall<br>(n=2,284) |     |     | Interaction by infant sex |     |     |            |   |     | Interaction by maternal race/ethnicity group |        |     |     |        |     |     |           |    |     |        |     |     |                  |
|-----------------|----------------------|-----|-----|---------------------------|-----|-----|------------|---|-----|----------------------------------------------|--------|-----|-----|--------|-----|-----|-----------|----|-----|--------|-----|-----|------------------|
|                 | beta                 | p   | FDR | Boys Only                 |     |     | Girls Only |   |     | P <sub>int</sub>                             | Whites |     |     | Blacks |     |     | Hispanics |    |     | Asians |     |     | P <sub>int</sub> |
|                 |                      |     |     | beta                      | p   | FDR | beta       | p | FDR |                                              | beta   | p   | FDR | beta   | p   | FDR | beta      | p  | FDR | beta   | p   | FDR |                  |
| β-HCH           | -0.04                |     |     | -0.09                     | *   |     | 0.00       |   |     | 0.122                                        | -0.17  |     |     | 0.86   | *   |     | -0.54     | ** |     | -0.04  |     |     | 0.014            |
| Y-HCH           | -0.12                | *** | **  | -0.13                     | *** | *** | 0.02       |   |     | 0.163                                        | -1.98  |     |     | -0.36  |     |     | -0.24     |    |     | -0.12  | *** | *   | 0.848            |
| HCB             | -0.01                |     |     | -0.02                     |     |     | 0.41       | . |     | 0.069                                        | 0.31   |     |     | 0.38   |     |     | -0.07     |    |     | -0.01  |     |     | 0.761            |
| Oxychlorodane   | 0.03                 |     |     | -0.06                     |     |     | 0.03       |   |     | 0.797                                        | -0.92  | .   |     | 0.19   |     |     | 0.28      |    |     | 0.03   |     |     | 0.322            |
| Trans-chlordane | 0.00                 |     |     | -0.02                     |     |     | 0.06       |   |     | 0.249                                        | -0.85  |     |     | 2.35   | *   |     | 0.43      |    |     | 0.00   |     |     | 0.111            |
| Trans-nonachlor | 0.03                 |     |     | -0.19                     |     |     | 0.05       |   |     | 0.116                                        | -0.42  | *   |     | 0.25   |     |     | 0.21      |    |     | 0.03   |     |     | 0.052            |
| p,p'-DDE        | -0.07                | *   |     | -0.10                     | *   | .   | -0.04      |   |     | 0.316                                        | -0.81  | *** | *** | 0.17   |     |     | -0.01     |    |     | -0.11  | *   |     | <0.001           |
| o,p'-DDD        | 0.00                 |     |     | 0.11                      | *   | .   | -0.07      | . |     | 0.001                                        | -0.14  |     |     | 0.05   |     |     | 0.10      |    |     | -0.07  | .   |     | 0.056            |
| p,p'-DDD        | 0.04                 |     |     | 0.07                      |     |     | 0.01       |   |     | 0.393                                        | 0.15   |     |     | 0.12   |     |     | 0.18      | *  |     | -0.01  |     |     | 0.098            |
| p,p'-DDT        | 0.04                 |     |     | 0.04                      |     |     | 0.04       |   |     | 0.906                                        | -0.46  |     |     | 0.09   |     |     | 0.10      | ** |     | -0.06  |     |     | 0.047            |
| Mirex           | -0.02                |     |     | -0.02                     |     |     | -0.03      |   |     | 0.815                                        | -0.05  |     |     | 0.04   |     |     | -0.02     |    |     | -0.03  |     |     | 0.963            |
| PBB 153         | 0.12                 | *** | **  | 0.16                      | *** | *** | 0.01       |   |     | 0.011                                        | 0.08   |     |     | 0.18   |     |     | 0.21      | ** |     | 0.11   | **  |     | 0.503            |
| PBDE 28         | -0.03                |     |     | -0.01                     |     |     | -0.16      | * |     | 0.034                                        | -1.07  | *** | *** | 0.00   |     |     | 0.05      |    |     | 0.00   |     |     | <0.001           |
| PBDE 47         | 0.01                 |     |     | 0.04                      |     |     | -0.02      |   |     | 0.296                                        | -0.13  | *   |     | 0.15   | *   |     | 0.12      | *  |     | -0.10  |     |     | <0.001           |
| PBDE 85         | -0.03                |     |     | -0.06                     | .   |     | 0.01       |   |     | 0.267                                        | 0.01   |     |     | 0.06   |     |     | -0.03     |    |     | -0.46  | *** | *** | <0.001           |
| PBDE 99         | -0.03                |     |     | -0.05                     |     |     | 0.01       |   |     | 0.277                                        | 0.02   |     |     | 0.02   |     |     | -0.09     |    |     | -0.17  | *   |     | 0.136            |
| PBDE 100        | -0.04                |     |     | -0.02                     |     |     | -0.07      | . |     | 0.294                                        | -0.22  | *** | *   | -0.01  |     |     | 0.11      | *  |     | -0.21  | **  |     | <0.001           |
| PBDE 153        | 0.04                 |     |     | 0.14                      | *** | **  | -0.07      |   |     | <0.001                                       | -0.06  |     |     | 0.15   | **  |     | 0.25      | ** |     | -0.02  |     |     | <0.001           |
| PBDE 154        | -0.04                |     |     | -0.09                     | *   | .   | 0.03       |   |     | 0.039                                        | 0.06   |     |     | -0.10  |     |     | -0.08     |    |     | -0.06  |     |     | 0.151            |
| PBDE 183        | -0.01                |     |     | 0.00                      |     |     | -0.03      |   |     | 0.535                                        | -0.03  |     |     | 0.23   |     |     | -0.03     |    |     | -0.03  |     |     | 0.012            |
| PBDE 209        | -0.05                | .   |     | -0.02                     |     |     | -0.09      | * |     | 0.209                                        | -0.02  |     |     | -0.09  |     |     | -0.02     |    |     | -0.02  |     |     | 0.081            |
| PCB 5/8         | 0.04                 |     |     | 0.04                      |     |     | 0.05       |   |     | 0.875                                        | 0.35   |     |     | 0.26   | **  |     | 0.01      |    |     | 0.02   |     |     | 0.088            |
| PCB 18/17       | 0.10                 | *** | **  | 0.11                      | *** | *** | -0.06      |   |     | 0.597                                        | 0.11   | *** | **  | 1.60   | **  | *   | -0.61     |    |     | -1.20  |     |     | 0.004            |
| PCB 22          | 0.04                 |     |     | 0.04                      |     |     | 0.05       |   |     | 0.816                                        | 0.22   | .   |     | 0.25   | **  | .   | -0.01     |    |     | -0.03  |     |     | 0.011            |
| PCB 31/28       | 0.03                 |     |     | 0.03                      |     |     | 0.04       |   |     | 0.899                                        | 0.07   |     |     | 0.22   | **  |     | -0.01     |    |     | 0.01   |     |     | 0.092            |
| PCB 33/20       | 0.03                 |     |     | 0.03                      |     |     | 0.05       |   |     | 0.719                                        | 0.16   |     |     | 0.25   | **  | .   | 0.00      |    |     | -0.05  |     |     | 0.022            |
| PCB 37          | 0.04                 |     |     | 0.05                      |     |     | 0.05       |   |     | 0.984                                        | 0.16   |     |     | 0.18   | *   |     | 0.02      |    |     | -0.07  |     |     | 0.097            |
| PCB 41/64       | 0.09                 | *   |     | 0.23                      | *** | **  | 0.02       |   |     | 0.008                                        | 0.23   | .   |     | 0.23   | *** | *   | -0.04     |    |     | 0.01   |     |     | 0.020            |
| PCB 44          | 0.08                 | *   |     | 0.23                      | *** | **  | 0.01       |   |     | 0.004                                        | 0.22   | .   |     | 0.25   | *** | *   | -0.06     |    |     | 0.00   |     |     | 0.006            |
| PCB 47/48/75    | 0.06                 | .   |     | 0.20                      | **  | *   | 0.01       |   |     | 0.021                                        | 0.12   |     |     | 0.19   | **  | *   | -0.08     |    |     | 0.01   |     |     | 0.050            |
| PCB 49/43       | 0.07                 | *   |     | 0.20                      | *** | **  | 0.01       |   |     | 0.013                                        | 0.18   |     |     | 0.23   | *** | *   | -0.04     |    |     | 0.00   |     |     | 0.012            |
| PCB 52/73       | 0.06                 |     |     | 0.20                      | *   |     | 0.03       |   |     | 0.127                                        | 0.24   |     |     | 0.30   | **  | .   | -0.08     |    |     | 0.02   |     |     | 0.045            |
| PCB 66/80       | 0.06                 | .   |     | 0.15                      | **  | *   | -0.01      |   |     | 0.017                                        | 0.05   |     |     | 0.20   | *** | *   | 0.01      |    |     | -0.01  |     |     | 0.057            |
| PCB 70/76       | 0.09                 | *   |     | 0.17                      | *** | **  | 0.03       |   |     | 0.033                                        | 0.19   |     |     | 0.23   | *** | *   | 0.00      |    |     | 0.02   |     |     | 0.028            |
| PCB 74/61       | 0.02                 |     |     | 0.08                      | .   |     | -0.04      |   |     | 0.067                                        | -0.06  |     |     | 0.15   | .   |     | -0.13     |    |     | 0.07   |     |     | 0.041            |
| PCB 90/101/89   | 0.08                 | *   |     | 0.30                      | *** | **  | 0.03       |   |     | 0.005                                        | 0.36   | *   |     | 0.27   | **  | *   | -0.10     |    |     | 0.03   |     |     | 0.018            |
| PCB 93/95       | 0.06                 |     |     | 0.71                      | **  | **  | 0.03       |   |     | 0.003                                        | 0.69   |     |     | 0.75   | **  | *   | -0.36     |    |     | 0.03   |     |     | 0.007            |
| PCB 99          | 0.02                 |     |     | 0.11                      |     |     | 0.00       |   |     | 0.306                                        | 0.10   |     |     | 0.15   |     |     | -0.14     |    |     | 0.00   |     |     | 0.363            |
| PCB 85/120      | 0.12                 | *** | *   | 0.28                      | *** | *** | 0.04       |   |     | <0.001                                       | 0.32   | *** | *   | 0.19   | **  | *   | 0.06      |    |     | 0.02   |     |     | 0.032            |
| PCB 110         | 0.09                 | *   |     | 0.29                      | *** | **  | 0.03       |   |     | 0.003                                        | 0.33   | *   |     | 0.26   | *** | *   | -0.05     |    |     | 0.03   |     |     | 0.020            |

| Chemicals   | Overall<br>(n=2,284) |     |     | Interaction by infant sex |    |     |            |     |     |                  | Interaction by maternal race/ethnicity group |    |     |        |     |     |           |     |     |        |     |     |                  |
|-------------|----------------------|-----|-----|---------------------------|----|-----|------------|-----|-----|------------------|----------------------------------------------|----|-----|--------|-----|-----|-----------|-----|-----|--------|-----|-----|------------------|
|             | beta                 | p   | FDR | Boys Only                 |    |     | Girls Only |     |     |                  | Whites                                       |    |     | Blacks |     |     | Hispanics |     |     | Asians |     |     | P <sub>int</sub> |
|             |                      |     |     | beta                      | p  | FDR | beta       | p   | FDR | P <sub>int</sub> | beta                                         | p  | FDR | beta   | p   | FDR | beta      | p   | FDR | beta   | p   | FDR |                  |
| PCB 118/106 | -0.02                |     |     | 0.02                      |    |     | -0.05      |     |     | 0.315            | 0.05                                         |    |     | 0.07   |     |     | -0.24     | *   |     | -0.07  |     |     | 0.044            |
| PCB 105/127 | -0.02                |     |     | 0.02                      |    |     | -0.05      |     |     | 0.308            | 0.05                                         |    |     | 0.07   |     |     | -0.24     | *   |     | -0.07  |     |     | 0.118            |
| PCB 114/122 | 0.01                 |     |     | 0.06                      |    |     | -0.01      |     |     | 0.940            | 0.09                                         |    |     | 0.10   |     |     | -0.15     |     |     | -0.04  |     |     | 0.082            |
| PCB 128     | -0.06                | .   |     | -0.05                     |    |     | -0.06      |     |     | 0.993            | -0.02                                        |    |     | -0.03  |     |     | -0.30     | **  |     | -0.10  |     |     | 0.125            |
| PCB 137     | -0.10                | **  | *   | -0.10                     | *  | .   | -0.10      | *   |     | 0.338            | -0.02                                        |    |     | -0.16  | **  |     | -0.04     |     |     | -0.19  | **  |     | 0.240            |
| PCB 138/158 | -0.03                |     |     | 0.02                      |    |     | -0.05      |     |     | 0.803            | 0.06                                         |    |     | -0.02  |     |     | -0.14     |     |     | -0.07  |     |     | 0.391            |
| PCB 146/161 | -0.06                | .   |     | -0.05                     |    |     | -0.07      |     |     | 0.291            | 0.00                                         |    |     | -0.03  |     |     | -0.01     |     |     | -0.13  | *   |     | 0.042            |
| PCB 153     | -0.03                |     |     | 0.01                      |    |     | -0.07      |     |     | 0.322            | 0.10                                         |    |     | 0.07   |     |     | 0.03      |     |     | -0.14  | **  |     | 0.073            |
| PCB 156     | -0.01                |     |     | 0.03                      |    |     | -0.04      |     |     | 0.612            | 0.02                                         |    |     | 0.12   |     |     | 0.18      |     |     | -0.10  | .   |     | 0.055            |
| PCB 157     | -0.03                |     |     | -0.02                     |    |     | -0.05      |     |     | 0.218            | 0.01                                         |    |     | -0.02  |     |     | 0.01      |     |     | -0.22  | **  |     | 0.046            |
| PCB 167     | -0.09                | **  |     | -0.06                     |    |     | -0.14      | **  |     | 0.922            | -0.01                                        |    |     | -0.09  |     |     | -0.17     | .   |     | -0.22  | *** | *   | 0.007            |
| PCB 170     | -0.11                | **  | *   | -0.11                     | *  | .   | -0.12      | *   |     | 0.711            | 0.04                                         |    |     | -0.12  |     |     | -0.27     | **  |     | -0.21  | *** | *   | <0.001           |
| PCB 172/192 | 0.00                 |     |     | 0.01                      |    |     | -0.02      |     |     | 0.956            | 0.00                                         |    |     | 0.29   | *   |     | 0.45      | *** | *   | -0.17  | *   |     | 0.020            |
| PCB 177     | -0.02                |     |     | -0.02                     |    |     | -0.03      |     |     | 0.661            | -0.01                                        |    |     | 0.08   |     |     | 0.18      | .   |     | -0.14  | *   |     | 0.009            |
| PCB 180     | -0.01                |     |     | -0.02                     |    |     | 0.00       |     |     | 0.408            | 0.09                                         |    |     | 0.13   |     |     | 0.10      |     |     | -0.14  | **  |     | <0.001           |
| PCB 182/187 | 0.01                 |     |     | 0.02                      |    |     | -0.03      |     |     | 0.423            | 0.00                                         |    |     | 0.28   | *   |     | 0.43      | *** | *   | -0.14  | *   |     | 0.021            |
| PCB 183     | 0.03                 |     |     | 0.09                      |    |     | 0.01       |     |     | 0.700            | 0.12                                         |    |     | 0.38   | **  |     | 0.20      |     |     | -0.04  |     |     | 0.210            |
| PCB 194     | 0.00                 |     |     | 0.02                      |    |     | -0.01      |     |     | 0.208            | 0.01                                         |    |     | 0.22   | .   |     | 0.08      |     |     | -0.05  |     |     | <0.001           |
| PCB 195     | 0.00                 |     |     | 0.02                      |    |     | -0.07      |     |     | 0.640            | -0.01                                        |    |     | 0.20   |     |     | 0.68      | *** | **  | -0.14  | .   |     | <0.001           |
| PCB 196/203 | 0.00                 |     |     | 0.01                      |    |     | -0.02      |     |     | 0.155            | -0.02                                        |    |     | 0.22   |     |     | 0.53      | *** | *   | -0.08  |     |     | <0.001           |
| PCB 199     | -0.03                |     |     | 0.00                      |    |     | -0.09      | .   |     | 0.131            | -0.04                                        |    |     | 0.12   |     |     | 0.50      | **  | .   | -0.13  | *   |     | 0.023            |
| PCB 202     | -0.04                |     |     | 0.00                      |    |     | -0.10      | .   |     | 0.204            | -0.03                                        |    |     | 0.10   |     |     | 0.31      | *   |     | -0.13  | *   |     | 0.073            |
| PCB 206     | -0.02                |     |     | 0.05                      |    |     | -0.05      |     |     | 0.295            | 0.04                                         |    |     | 0.21   | *   |     | 0.09      |     |     | -0.09  | .   |     | 0.015            |
| PCB 208     | -0.11                | **  |     | -0.08                     |    |     | -0.16      | **  |     | 0.083            | -0.14                                        | *  |     | 0.04   |     |     | 0.19      |     |     | -0.23  | *** | *   | 0.106            |
| PCB 209     | -0.18                | *** | **  | -0.11                     | .  |     | -0.26      | *** | **  | 0.126            | -0.28                                        | ** |     | -0.08  |     |     | 0.06      |     |     | -0.23  | *** | *   | 0.365            |
| NMeFOSAA    | 0.06                 |     |     | 0.14                      | *  |     | 0.00       |     |     | 0.238            | 0.05                                         |    |     | 0.13   |     |     | 0.18      |     |     | -0.03  |     |     | <0.001           |
| PFDA        | -0.08                | **  |     | -0.04                     |    |     | -0.12      | **  |     | 0.202            | -0.21                                        | ** |     | -0.01  |     |     | -0.25     | *** | *   | 0.14   | *   |     | 0.013            |
| PFDoDA      | -0.01                |     |     | 0.04                      |    |     | -0.04      |     |     | 0.769            | 0.03                                         |    |     | -0.11  | *   |     | 0.15      | *   |     | -0.06  |     |     | 0.709            |
| PFDS        | 0.02                 |     |     | 0.01                      |    |     | 0.02       |     |     | 0.859            | 0.12                                         |    |     | 0.01   |     |     | 0.00      |     |     | 0.03   |     |     | 0.338            |
| PFHpA       | -0.13                | *** | **  | -0.12                     | ** | *   | -0.13      | **  |     | 0.414            | -0.17                                        | .  |     | -0.18  | *** | *   | -0.12     |     |     | -0.06  |     |     | 0.558            |
| PFHxS       | 0.07                 | *   |     | 0.10                      | *  | .   | 0.05       |     |     | 0.562            | 0.09                                         | .  |     | 0.11   |     |     | 0.08      |     |     | -0.01  |     |     | 0.087            |
| PFNA        | -0.12                | *** | **  | -0.13                     | ** | **  | -0.10      | *   |     | 0.153            | -0.11                                        | *  |     | -0.20  | *** | *   | -0.11     |     |     | 0.05   |     |     | 0.041            |
| PFOA        | -0.03                |     |     | 0.01                      |    |     | -0.07      |     |     | 0.669            | -0.03                                        |    |     | -0.07  |     |     | 0.10      | .   |     | -0.12  | .   |     | 0.013            |
| PFOS        | -0.02                |     |     | -0.01                     |    |     | -0.03      |     |     | <0.001           | -0.08                                        |    |     | -0.13  | .   |     | 0.03      |     |     | 0.14   | *   |     | 0.845            |
| PFOSA       | -0.09                | **  |     | 0.02                      |    |     | -0.20      | *** | **  | 0.115            | -0.08                                        |    |     | -0.12  | *   |     | -0.05     |     |     | -0.11  | .   |     | <0.001           |
| PFUnDA      | -0.01                |     |     | 0.02                      |    |     | -0.07      |     |     | 0.590            | -0.18                                        | ** |     | -0.11  | .   |     | 0.01      |     |     | 0.15   | **  |     | 0.062            |

P-values: \*\*\*<0.001 ; \*\*0.001-0.01 ; \*<0.01-0.05 ; . 0.05-0.1

FDR: p-values after false discovery rate correction (\*\*\*<0.001 ; \*\*0.001-0.01 ; \*<0.01-0.05 ; . 0.05-0.1)

P<sub>int</sub>: p-values of interaction

Adjusted for maternal race/ethnicity (White, Black, Hispanic, Asian), maternal age (years, continuous), pre-pregnancy BMI (kg/m<sup>2</sup>, continuous), parity (0,1,2, 3 or more), highest level of education (Less than high school, High school diploma or GED or equivalent, Some college or Associate degree, Bachelors degree, Masters degree or Advanced degree), marital status (not married vs. living as married), infant sex (male, female), gestational age at the time of ultrasound (continuous), total serum lipids (except for PFASs, ng/mL, continuous) and log transformed plasma cotinine level (log(x+1), continuous), with repeated measurements of fetal growth (random effect variable corresponding to the mother-child pair), and with a smooth function for the gestational age.

**eTable 9: Association between EDCs and longitudinal occipital-frontal diameter using a generalized additive mixed model, NICHD Fetal Growth Studies – Singletons (n=2,284).**

| Chemicals       | Overall<br>(n=2,284) |     |     | Interaction by infant sex |     |     |            |     |     |                  | Interaction by maternal race/ethnicity group |     |     |        |     |     |           |   |     |        |     |     |                  |
|-----------------|----------------------|-----|-----|---------------------------|-----|-----|------------|-----|-----|------------------|----------------------------------------------|-----|-----|--------|-----|-----|-----------|---|-----|--------|-----|-----|------------------|
|                 | beta                 | p   | FDR | Boys Only                 |     |     | Girls Only |     |     |                  | Whites                                       |     |     | Blacks |     |     | Hispanics |   |     | Asians |     |     | P <sub>int</sub> |
|                 |                      |     |     | beta                      | p   | FDR | beta       | p   | FDR | P <sub>int</sub> | beta                                         | p   | FDR | beta   | p   | FDR | beta      | p | FDR | beta   | p   | FDR |                  |
| β-HCH           | 0.18                 | *** | .   | 0.20                      | **  | .   | 0.16       | *   |     | 0.740            | -0.24                                        |     |     | 1.73   | *   |     | -0.51     |   |     | 0.20   | *** | *   | 0.016            |
| γ-HCH           | 0.10                 | .   |     | 0.12                      | *   |     | -0.12      |     |     | 0.163            | 7.01                                         | .   |     | -0.12  |     |     | 3.72      | * |     | 0.10   | .   |     | 0.071            |
| HCB             | -0.08                | .   |     | -0.09                     | *   |     | 0.46       |     |     | 0.157            | 0.10                                         |     |     | 0.59   |     |     | -0.05     |   |     | -0.09  | .   |     | 0.743            |
| Oxychlorthane   | -0.03                |     |     | -1.75                     | **  | .   | -0.01      |     |     | 0.007            | -1.81                                        | *   |     | -1.35  |     |     | -1.54     |   |     | 0.00   |     |     | 0.047            |
| Trans-chlordane | -0.09                | .   |     | -0.13                     | *   |     | 0.02       |     |     | 0.216            | 3.30                                         |     |     | 3.49   | *   |     | 1.62      |   |     | -0.10  | .   |     | 0.085            |
| Trans-nonachlor | -0.04                |     |     | -0.45                     | .   |     | 0.00       |     |     | 0.073            | -0.32                                        |     |     | 0.13   |     |     | -0.44     |   |     | -0.01  |     |     | 0.452            |
| p,p'-DDE        | -0.14                | **  |     | -0.18                     | *   |     | -0.11      |     |     | 0.446            | -1.17                                        | *** | *** | -0.21  |     |     | -0.18     | * |     | 0.07   |     |     | <0.001           |
| o,p'-DDD        | 0.10                 | *   |     | 0.18                      | *   |     | 0.05       |     |     | 0.160            | 0.20                                         |     |     | 0.07   |     |     | 0.13      |   |     | 0.10   |     |     | 0.959            |
| p,p'-DDD        | 0.03                 |     |     | 0.01                      |     |     | 0.04       |     |     | 0.716            | 0.25                                         |     |     | 0.07   |     |     | -0.14     |   |     | 0.03   |     |     | 0.479            |
| p,p'-DDT        | 0.07                 |     |     | 0.06                      |     |     | 0.08       |     |     | 0.831            | 0.27                                         |     |     | 0.23   |     |     | 0.01      |   |     | 0.17   | *   |     | 0.402            |
| Mirex           | -0.06                |     |     | -0.16                     | *   |     | 0.05       |     |     | 0.035            | -0.04                                        |     |     | -0.15  |     |     | -0.12     | . |     | 0.07   |     |     | 0.428            |
| PBB 153         | 0.06                 |     |     | 0.14                      | **  |     | -0.13      |     |     | 0.005            | -0.05                                        |     |     | 0.07   |     |     | 0.00      |   |     | 0.15   | *   |     | 0.184            |
| PBDE 28         | 0.00                 |     |     | 0.03                      |     |     | -0.18      |     |     | 0.090            | -0.92                                        | *** | *   | 0.02   |     |     | 0.04      |   |     | 0.08   |     |     | 0.001            |
| PBDE 47         | -0.16                | *** | .   | -0.08                     |     |     | -0.23      | *** | .   | 0.111            | -0.23                                        | *   |     | -0.16  | .   |     | -0.06     |   |     | -0.17  | .   |     | 0.678            |
| PBDE 85         | -0.10                | *   |     | -0.07                     |     |     | -0.16      | *   |     | 0.334            | -0.06                                        |     |     | -0.02  |     |     | -0.06     |   |     | -0.58  | *** | *   | 0.011            |
| PBDE 99         | -0.03                |     |     | -0.01                     |     |     | -0.08      |     |     | 0.524            | -0.09                                        |     |     | 0.05   |     |     | -0.08     |   |     | -0.16  |     |     | 0.401            |
| PBDE 100        | -0.20                | *** | **  | -0.14                     | *   |     | -0.25      | *** | *   | 0.224            | -0.30                                        | **  |     | -0.21  | **  |     | -0.03     |   |     | -0.37  | **  |     | 0.052            |
| PBDE 153        | -0.13                | *   |     | -0.03                     |     |     | -0.22      | **  |     | 0.053            | -0.18                                        | **  |     | -0.01  |     |     | -0.07     |   |     | -0.24  |     |     | 0.428            |
| PBDE 154        | -0.13                | **  |     | -0.13                     | *   |     | -0.13      | .   |     | 0.947            | -0.18                                        | *   |     | -0.16  |     |     | -0.08     |   |     | -0.07  |     |     | 0.782            |
| PBDE 183        | 0.01                 |     |     | 0.03                      |     |     | -0.03      |     |     | 0.510            | 0.01                                         |     |     | 0.08   |     |     | 0.01      |   |     | 0.01   |     |     | 0.742            |
| PBDE 209        | -0.09                | .   |     | 0.02                      |     |     | -0.22      | **  |     | 0.011            | 0.02                                         |     |     | -0.22  |     |     | 0.02      |   |     | 0.02   |     |     | 0.006            |
| PCB 5/8         | 0.02                 |     |     | 0.11                      |     |     | -0.05      |     |     | 0.151            | -0.47                                        |     |     | 0.32   | *   |     | 0.02      |   |     | -0.06  |     |     | 0.157            |
| PCB 18/17       | 0.03                 |     |     | 0.04                      |     |     | 0.01       |     |     | 0.935            | 0.04                                         |     |     | 1.68   | *   |     | -0.28     |   |     | -2.02  |     |     | 0.132            |
| PCB 22          | 0.07                 |     |     | 0.09                      |     |     | 0.05       |     |     | 0.710            | -0.03                                        |     |     | 0.46   | *** | .   | 0.02      |   |     | 0.00   |     |     | 0.022            |
| PCB 31/28       | 0.10                 | *   |     | 0.14                      | *   |     | 0.03       |     |     | 0.280            | -0.10                                        |     |     | 0.37   | **  |     | 0.02      |   |     | 0.24   | *   |     | 0.036            |
| PCB 33/20       | 0.05                 |     |     | 0.07                      |     |     | 0.02       |     |     | 0.651            | -0.10                                        |     |     | 0.46   | *** | .   | 0.02      |   |     | -0.11  |     |     | 0.015            |
| PCB 37          | 0.10                 | .   |     | 0.12                      | .   |     | 0.08       |     |     | 0.712            | 0.06                                         |     |     | 0.44   | *** | .   | 0.04      |   |     | 0.02   |     |     | 0.038            |
| PCB 41/64       | 0.05                 |     |     | 0.19                      | .   |     | -0.01      |     |     | 0.115            | -0.05                                        |     |     | 0.25   | *   |     | -0.01     |   |     | -0.04  |     |     | 0.195            |
| PCB 44          | 0.01                 |     |     | 0.16                      |     |     | -0.05      |     |     | 0.095            | -0.10                                        |     |     | 0.22   | *   |     | -0.11     |   |     | -0.04  |     |     | 0.173            |
| PCB 47/48/75    | 0.02                 |     |     | 0.18                      | .   |     | -0.04      |     |     | 0.076            | -0.08                                        |     |     | 0.17   | .   |     | -0.13     |   |     | -0.01  |     |     | 0.272            |
| PCB 49/43       | 0.01                 |     |     | 0.13                      |     |     | -0.05      |     |     | 0.146            | -0.12                                        |     |     | 0.19   | .   |     | -0.09     |   |     | -0.05  |     |     | 0.188            |
| PCB 52/73       | -0.01                |     |     | 0.16                      |     |     | -0.04      |     |     | 0.250            | -0.43                                        |     |     | 0.23   |     |     | -0.06     |   |     | -0.03  |     |     | 0.322            |
| PCB 66/80       | 0.11                 | *   |     | 0.26                      | *** | .   | -0.02      |     |     | 0.009            | 0.08                                         |     |     | 0.19   | *   |     | 0.05      |   |     | 0.10   |     |     | 0.796            |
| PCB 70/76       | 0.06                 |     |     | 0.17                      | *   |     | -0.02      |     |     | 0.085            | -0.04                                        |     |     | 0.25   | *   |     | 0.01      |   |     | -0.04  |     |     | 0.165            |
| PCB 74/61       | 0.04                 |     |     | 0.14                      | *   |     | -0.09      |     |     | 0.025            | -0.06                                        |     |     | 0.05   |     |     | -0.06     |   |     | 0.13   |     |     | 0.427            |
| PCB 90/101/89   | 0.02                 |     |     | 0.20                      |     |     | -0.02      |     |     | 0.151            | 0.06                                         |     |     | 0.25   | .   |     | -0.14     |   |     | -0.02  |     |     | 0.308            |
| PCB 93/95       | 0.00                 |     |     | 0.49                      |     |     | -0.01      |     |     | 0.171            | 0.03                                         |     |     | 0.66   | .   |     | -0.51     |   |     | -0.01  |     |     | 0.260            |
| PCB 99          | 0.02                 |     |     | 0.22                      |     |     | -0.02      |     |     | 0.124            | 0.15                                         |     |     | 0.12   |     |     | 0.14      |   |     | -0.03  |     |     | 0.752            |
| PCB 85/120      | 0.09                 |     |     | 0.25                      | **  | .   | 0.00       |     |     | 0.031            | 0.18                                         | .   |     | 0.18   | .   |     | 0.15      |   |     | -0.01  |     |     | 0.489            |
| PCB 110         | 0.04                 |     |     | 0.25                      | *   |     | -0.03      |     |     | 0.043            | 0.10                                         |     |     | 0.26   | *   |     | -0.04     |   |     | -0.03  |     |     | 0.277            |

| Chemicals   | Overall<br>(n=2,284) |    |     | Interaction by infant sex |    |     |            |     |     |                  | Interaction by maternal race/ethnicity group |     |     |        |     |     |           |     |     |        |   |     |                  |
|-------------|----------------------|----|-----|---------------------------|----|-----|------------|-----|-----|------------------|----------------------------------------------|-----|-----|--------|-----|-----|-----------|-----|-----|--------|---|-----|------------------|
|             | beta                 | p  | FDR | Boys Only                 |    |     | Girls Only |     |     |                  | Whites                                       |     |     | Blacks |     |     | Hispanics |     |     | Asians |   |     | P <sub>int</sub> |
|             |                      |    |     | beta                      | p  | FDR | beta       | p   | FDR | P <sub>int</sub> | beta                                         | p   | FDR | beta   | p   | FDR | beta      | p   | FDR | beta   | p | FDR |                  |
| PCB 118/106 | 0.00                 |    |     | 0.14                      |    |     | -0.09      |     |     | 0.042            | 0.08                                         |     |     | 0.01   |     |     | -0.07     |     |     | -0.05  |   |     | 0.776            |
| PCB 105/127 | 0.02                 |    |     | 0.15                      |    |     | -0.06      |     |     | 0.062            | 0.08                                         |     |     | 0.07   |     |     | -0.02     |     |     | -0.04  |   |     | 0.856            |
| PCB 114/122 | 0.03                 |    |     | 0.11                      |    |     | -0.01      |     |     | 0.232            | 0.03                                         |     |     | 0.06   |     |     | -0.11     |     |     | 0.13   |   |     | 0.706            |
| PCB 128     | -0.07                |    |     | -0.01                     |    |     | -0.13      |     |     | 0.240            | -0.16                                        |     |     | 0.00   |     |     | -0.09     |     |     | -0.01  |   |     | 0.595            |
| PCB 137     | -0.05                |    |     | 0.06                      |    |     | -0.10      |     |     | 0.154            | 0.01                                         |     |     | -0.08  |     |     | -0.12     |     |     | -0.06  |   |     | 0.879            |
| PCB 138/158 | -0.05                |    |     | 0.02                      |    |     | -0.11      |     |     | 0.203            | -0.05                                        |     |     | 0.02   |     |     | 0.14      |     |     | -0.11  |   |     | 0.656            |
| PCB 146/161 | 0.02                 |    |     | 0.14                      |    |     | -0.08      |     |     | 0.047            | 0.00                                         |     |     | 0.36   | *   |     | 0.12      |     |     | -0.12  |   |     | 0.033            |
| PCB 153     | -0.04                |    |     | 0.04                      |    |     | -0.11      |     |     | 0.175            | -0.08                                        |     |     | 0.19   |     |     | 0.34      |     |     | -0.14  |   |     | 0.075            |
| PCB 156     | -0.05                |    |     | 0.03                      |    |     | -0.17      | *   |     | 0.039            | -0.03                                        |     |     | -0.14  |     |     | 0.05      |     |     | -0.12  |   |     | 0.748            |
| PCB 157     | -0.13                | ** |     | -0.02                     |    |     | -0.31      | *** | *   | 0.003            | -0.03                                        |     |     | -0.37  | *   |     | -0.31     | *   |     | -0.16  |   |     | 0.092            |
| PCB 167     | -0.13                | *  |     | -0.03                     |    |     | -0.22      | **  |     | 0.075            | -0.06                                        |     |     | -0.25  |     |     | -0.31     | *   |     | -0.10  |   |     | 0.457            |
| PCB 170     | -0.04                |    |     | -0.02                     |    |     | -0.11      |     |     | 0.442            | -0.09                                        |     |     | 0.32   |     |     | 0.53      | **  |     | -0.14  |   |     | 0.005            |
| PCB 172/192 | -0.02                |    |     | 0.04                      |    |     | -0.13      |     |     | 0.127            | -0.11                                        |     |     | 0.59   | *** |     | 0.09      |     |     | -0.10  |   |     | 0.002            |
| PCB 177     | -0.03                |    |     | 0.04                      |    |     | -0.10      |     |     | 0.232            | -0.06                                        |     |     | 0.38   | *   |     | 0.27      |     |     | -0.14  |   |     | 0.037            |
| PCB 180     | -0.04                |    |     | 0.00                      |    |     | -0.13      |     |     | 0.238            | -0.10                                        |     |     | 0.34   |     |     | 0.47      | *   |     | -0.12  |   |     | 0.007            |
| PCB 182/187 | 0.01                 |    |     | 0.13                      |    |     | -0.03      |     |     | 0.209            | 0.03                                         |     |     | 0.61   | **  |     | 0.27      |     |     | -0.07  |   |     | 0.040            |
| PCB 183     | -0.02                |    |     | 0.04                      |    |     | -0.07      |     |     | 0.321            | -0.06                                        |     |     | 0.45   | *   |     | 0.13      |     |     | -0.09  |   |     | 0.066            |
| PCB 194     | -0.08                |    |     | -0.04                     |    |     | -0.24      | *   |     | 0.075            | -0.10                                        |     |     | 0.20   |     |     | 0.76      | **  |     | -0.19  |   |     | 0.002            |
| PCB 195     | -0.04                |    |     | -0.02                     |    |     | -0.07      |     |     | 0.660            | -0.09                                        |     |     | 0.39   |     |     | 0.79      | *** |     | -0.11  |   |     | <0.001           |
| PCB 196/203 | -0.09                |    |     | -0.04                     |    |     | -0.19      | *   |     | 0.174            | -0.14                                        | *   |     | 0.06   |     |     | 0.69      | **  |     | -0.13  |   |     | 0.013            |
| PCB 199     | -0.07                |    |     | -0.02                     |    |     | -0.16      |     |     | 0.205            | -0.14                                        |     |     | 0.09   |     |     | 0.34      |     |     | -0.08  |   |     | 0.216            |
| PCB 202     | 0.00                 |    |     | 0.13                      |    |     | -0.07      |     |     | 0.104            | -0.08                                        |     |     | 0.26   |     |     | 0.28      |     |     | -0.05  |   |     | 0.275            |
| PCB 206     | -0.05                |    |     | 0.01                      |    |     | -0.13      |     |     | 0.274            | -0.13                                        |     |     | 0.16   |     |     | 0.46      | *   |     | -0.15  |   |     | 0.040            |
| PCB 208     | -0.09                |    |     | 0.01                      |    |     | -0.20      | *   |     | 0.111            | -0.19                                        |     |     | -0.19  |     |     | 0.52      | *   |     | -0.13  |   |     | 0.030            |
| PCB 209     | 0.13                 |    |     | 0.35                      | ** |     | -0.03      |     |     | 0.010            | -0.01                                        |     |     | -0.04  |     |     | 0.62      | *** |     | 0.07   |   |     | 0.016            |
| NMeFOSAA    | -0.08                |    |     | 0.02                      |    |     | -0.17      | *   |     | 0.057            | -0.04                                        |     |     | -0.08  |     |     | -0.17     |     |     | 0.01   |   |     | 0.645            |
| PFDA        | 0.09                 |    |     | 0.10                      |    |     | 0.08       |     |     | 0.808            | 0.27                                         | **  |     | -0.06  |     |     | 0.05      |     |     | 0.11   |   |     | 0.135            |
| PFDoDA      | 0.01                 |    |     | 0.08                      |    |     | -0.01      |     |     | 0.379            | 0.24                                         |     |     | 0.02   |     |     | -0.10     |     |     | 0.23   |   |     | 0.039            |
| PFDS        | -0.03                |    |     | 0.02                      |    |     | -0.09      |     |     | 0.247            | 0.18                                         |     |     | -0.18  | *   |     | -0.14     |     |     | 0.05   |   |     | 0.101            |
| PFHpA       | 0.10                 | *  |     | 0.02                      |    |     | 0.18       | **  |     | 0.069            | 0.18                                         | *   |     | 0.04   |     |     | 0.08      |     |     | 0.05   |   |     | 0.627            |
| PFHxS       | -0.04                |    |     | -0.03                     |    |     | -0.05      |     |     | 0.886            | -0.07                                        |     |     | -0.21  | *   |     | 0.12      |     |     | 0.19   |   |     | 0.052            |
| PFNA        | 0.04                 |    |     | 0.02                      |    |     | 0.06       |     |     | 0.734            | 0.18                                         |     |     | -0.05  |     |     | -0.01     |     |     | 0.07   |   |     | 0.338            |
| PFOA        | 0.02                 |    |     | -0.05                     |    |     | 0.09       |     |     | 0.139            | 0.02                                         |     |     | -0.07  |     |     | 0.10      |     |     | 0.02   |   |     | 0.786            |
| PFOS        | -0.07                |    |     | 0.00                      |    |     | -0.13      |     |     | 0.184            | -0.03                                        |     |     | -0.18  |     |     | 0.02      |     |     | -0.04  |   |     | 0.587            |
| PFOSA       | -0.05                |    |     | 0.04                      |    |     | -0.21      | **  |     | 0.008            | -0.38                                        | *** | *   | -0.04  |     |     | -0.10     |     |     | 0.16   |   |     | <0.001           |
| PFUnDA      | 0.10                 | *  |     | 0.16                      | *  |     | 0.06       |     |     | 0.291            | 0.30                                         | *   |     | -0.02  |     |     | -0.03     |     |     | 0.22   | * |     | 0.101            |

P-values: \*\*\*<0.001 ; \*\*0.001-0.01 ; \*<0.01-0.05 ; . 0.05-0.1

FDR: p-values after false discovery rate correction (\*\*\*<0.001 ; \*\*0.001-0.01 ; \*<0.01-0.05 ; . 0.05-0.1)

P<sub>int</sub>: p-values of interaction

Adjusted for maternal race/ethnicity (White, Black, Hispanic, Asian), maternal age (years, continuous), pre-pregnancy BMI (kg/m<sup>2</sup>, continuous), parity (0,1,2, 3 or more), highest level of education (Less than high school, High school diploma or GED or equivalent, Some college or Associate degree, Bachelors degree, Masters degree or Advanced degree), marital status (not married vs. living as married), infant sex (male, female), gestational age at the time of ultrasound (continuous), total serum lipids (except for PFASs, ng/mL, continuous) and log transformed plasma cotinine level (log(x+1), continuous), with repeated measurements of fetal growth (random effect variable corresponding to the mother-child pair), and with a smooth function for the gestational age.



**eTable 10: Association between EDCs and longitudinal abdominal circumference using a generalized additive mixed model, NICHD Fetal Growth Studies – Singletons (n=2,284).**

| Chemicals       | Overall<br>(n=2,284) |    |     | Interaction by infant sex |    |     |            |     |     | Interaction by maternal race/ethnicity group |        |     |     |        |     |     |           |    |     |        |    |     |                  |
|-----------------|----------------------|----|-----|---------------------------|----|-----|------------|-----|-----|----------------------------------------------|--------|-----|-----|--------|-----|-----|-----------|----|-----|--------|----|-----|------------------|
|                 | beta                 | p  | FDR | Boys Only                 |    |     | Girls Only |     |     | P <sub>int</sub>                             | Whites |     |     | Blacks |     |     | Hispanics |    |     | Asians |    |     | P <sub>int</sub> |
|                 |                      |    |     | beta                      | p  | FDR | beta       | p   | FDR |                                              | beta   | p   | FDR | beta   | p   | FDR | beta      | p  | FDR | beta   | p  | FDR |                  |
| β-HCH           | -0.37                | *  |     | -0.65                     | ** | *   | -0.16      |     |     | 0.057                                        | -0.27  |     |     | 5.15   | **  |     | 1.73      | .  |     | -0.47  | ** |     | 0.003            |
| γ-HCH           | -0.30                | *  |     | -0.15                     |    |     | -1.76      | *** | *   | <0.001                                       | 18.62  |     |     | -5.18  | .   |     | -2.19     |    |     | -0.29  | *  |     | 0.118            |
| HCB             | 0.10                 |    |     | 0.10                      |    |     | 0.26       |     |     | 0.906                                        | 0.80   |     |     | -1.50  |     |     | -0.36     |    |     | 0.12   |    |     | 0.757            |
| Oxychlorthane   | -0.03                |    |     | -1.23                     |    |     | -0.01      |     |     | 0.455                                        | -1.57  |     |     | -5.51  | *   |     | -2.02     |    |     | 0.03   |    |     | 0.098            |
| Trans-chlordane | 0.11                 |    |     | 0.14                      |    |     | 0.05       |     |     | 0.787                                        | 0.69   |     |     | 3.34   |     |     | -0.65     |    |     | 0.11   |    |     | 0.901            |
| Trans-nonachlor | 0.10                 |    |     | 0.58                      |    |     | 0.06       |     |     | 0.454                                        | -0.55  |     |     | -0.43  |     |     | 1.40      |    |     | 0.10   |    |     | 0.384            |
| p,p'-DDE        | -0.06                |    |     | -0.28                     |    |     | 0.17       |     |     | 0.083                                        | -4.60  | *** | *** | 0.26   |     |     | 0.47      | *  |     | -0.25  |    |     | <0.001           |
| o,p'-DDD        | -0.10                |    |     | 0.01                      |    |     | -0.17      |     |     | 0.449                                        | -0.44  |     |     | -0.79  | **  | .   | 0.74      | ** |     | -0.09  |    |     | <0.001           |
| p,p'-DDD        | 0.29                 | *  |     | 0.64                      | ** | *   | -0.01      |     |     | 0.027                                        | -0.77  |     |     | 0.44   |     |     | 0.78      | *  |     | 0.24   |    |     | 0.188            |
| p,p'-DDT        | 0.17                 |    |     | 0.09                      |    |     | 0.29       |     |     | 0.431                                        | -3.79  | .   |     | 0.75   |     |     | 0.39      | *  |     | -0.24  |    |     | 0.021            |
| Mirex           | 0.08                 |    |     | -0.04                     |    |     | 0.21       |     |     | 0.350                                        | -0.27  |     |     | 0.81   |     |     | 0.00      |    |     | 0.22   |    |     | 0.492            |
| PBB 153         | 0.11                 |    |     | 0.18                      |    |     | -0.10      |     |     | 0.281                                        | 0.16   |     |     | -0.25  |     |     | 0.44      |    |     | 0.01   |    |     | 0.676            |
| PBDE 28         | -0.16                |    |     | -0.08                     |    |     | -0.67      | *   |     | 0.092                                        | -3.53  | *** | *** | -0.22  |     |     | 0.32      |    |     | -0.05  |    |     | <0.001           |
| PBDE 47         | -0.24                | .  |     | 0.27                      |    |     | -0.71      | *** | *   | <0.001                                       | -0.69  | **  |     | -0.19  |     |     | 0.32      |    |     | -0.34  |    |     | 0.059            |
| PBDE 85         | -0.20                |    |     | -0.14                     |    |     | -0.35      |     |     | 0.401                                        | -0.46  | *   |     | 0.43   |     |     | -0.13     |    |     | -0.72  | .  |     | 0.061            |
| PBDE 99         | -0.21                |    |     | -0.20                     |    |     | -0.23      |     |     | 0.915                                        | -0.46  |     |     | -0.27  |     |     | 0.16      |    |     | -0.21  |    |     | 0.465            |
| PBDE 100        | -0.36                | ** |     | -0.20                     |    |     | -0.53      | **  |     | 0.181                                        | -1.24  | *** | *** | -0.35  |     |     | 0.28      |    |     | -0.39  |    |     | <0.001           |
| PBDE 153        | 0.03                 |    |     | 0.34                      | .  |     | -0.27      |     |     | 0.020                                        | -0.34  | .   |     | 0.13   |     |     | 1.21      | ** |     | 0.67   |    |     | 0.004            |
| PBDE 154        | -0.34                | ** |     | -0.35                     | *  |     | -0.33      | .   |     | 0.970                                        | -0.80  | *** | *   | -0.26  |     |     | -0.06     |    |     | -0.11  |    |     | 0.104            |
| PBDE 183        | -0.21                |    |     | -0.38                     | *  | .   | 0.18       |     |     | 0.046                                        | -0.30  |     |     | 1.01   |     |     | -0.30     |    |     | -0.30  |    |     | 0.007            |
| PBDE 209        | -0.12                |    |     | -0.03                     |    |     | -0.24      |     |     | 0.416                                        | -0.03  |     |     | -0.24  |     |     | -0.03     |    |     | -0.03  |    |     | 0.461            |
| PCB 5/8         | 0.02                 |    |     | 0.16                      |    |     | -0.08      |     |     | 0.458                                        | -0.61  |     |     | 1.00   | *   |     | -0.22     |    |     | 0.19   |    |     | 0.072            |
| PCB 18/17       | 0.26                 | *  |     | 0.25                      | *  |     | 1.84       |     |     | 0.281                                        | 0.24   | *   |     | 7.73   | *** | .   | -1.11     |    |     | 7.19   |    |     | 0.003            |
| PCB 22          | 0.14                 |    |     | 0.14                      |    |     | 0.17       |     |     | 0.935                                        | 0.27   |     |     | 1.26   | *** | .   | -0.17     |    |     | 0.88   | .  |     | <0.001           |
| PCB 31/28       | 0.03                 |    |     | 0.06                      |    |     | 0.03       |     |     | 0.919                                        | -0.57  |     |     | 0.93   | *   |     | -0.20     |    |     | 0.38   |    |     | 0.015            |
| PCB 33/20       | 0.10                 |    |     | 0.10                      |    |     | 0.15       |     |     | 0.886                                        | 0.02   |     |     | 1.32   | *** | .   | -0.17     |    |     | 0.58   |    |     | 0.003            |
| PCB 37          | 0.20                 |    |     | 0.19                      |    |     | 0.24       |     |     | 0.837                                        | 0.34   |     |     | 1.28   | *** | .   | -0.14     |    |     | 0.74   | .  |     | 0.002            |
| PCB 41/64       | 0.28                 | .  |     | 0.78                      | ** | *   | 0.05       |     |     | 0.040                                        | 0.35   |     |     | 0.80   | **  |     | -0.40     |    |     | 0.18   |    |     | 0.097            |
| PCB 44          | 0.26                 |    |     | 0.77                      | ** | *   | 0.03       |     |     | 0.035                                        | 0.50   |     |     | 0.68   | *   |     | -0.44     |    |     | 0.24   |    |     | 0.121            |
| PCB 47/48/75    | 0.14                 |    |     | 0.53                      | .  |     | -0.01      |     |     | 0.128                                        | 0.34   |     |     | 0.52   | .   |     | -0.80     | *  |     | 0.22   |    |     | 0.033            |
| PCB 49/43       | 0.23                 |    |     | 0.64                      | *  | .   | 0.03       |     |     | 0.072                                        | 0.33   |     |     | 0.66   | *   |     | -0.42     |    |     | 0.22   |    |     | 0.107            |
| PCB 52/73       | 0.15                 |    |     | 0.73                      | .  |     | 0.04       |     |     | 0.159                                        | 0.21   |     |     | 0.65   |     |     | -0.46     |    |     | 0.15   |    |     | 0.432            |
| PCB 66/80       | 0.22                 |    |     | 0.42                      | .  |     | 0.06       |     |     | 0.233                                        | 0.34   |     |     | 0.77   | **  |     | -0.39     |    |     | 0.17   |    |     | 0.036            |
| PCB 70/76       | 0.33                 | *  |     | 0.64                      | ** | *   | 0.11       |     |     | 0.093                                        | 0.35   |     |     | 0.87   | **  | .   | -0.19     |    |     | 0.31   |    |     | 0.058            |
| PCB 74/61       | 0.05                 |    |     | 0.21                      |    |     | -0.14      |     |     | 0.223                                        | -0.34  |     |     | 0.23   |     |     | -0.68     | .  |     | 0.44   | *  |     | 0.029            |
| PCB 90/101/89   | 0.25                 |    |     | 1.10                      | ** | *   | 0.04       |     |     | 0.017                                        | 0.90   |     |     | 0.79   | *   |     | -0.48     |    |     | 0.16   |    |     | 0.203            |
| PCB 93/95       | 0.14                 |    |     | 2.67                      | ** | *   | 0.03       |     |     | 0.009                                        | 1.97   |     |     | 2.20   | *   |     | -1.45     |    |     | 0.07   |    |     | 0.112            |
| PCB 99          | 0.21                 |    |     | 0.69                      | .  |     | 0.10       |     |     | 0.178                                        | 0.71   |     |     | 0.55   |     |     | -0.99     |    |     | 0.16   |    |     | 0.183            |
| PCB 85/120      | 0.46                 | ** |     | 0.83                      | ** | *   | 0.25       |     |     | 0.074                                        | 0.82   | *   |     | 0.54   | .   |     | 0.45      |    |     | 0.29   |    |     | 0.765            |
| PCB 110         | 0.29                 | .  |     | 0.96                      | ** | *   | 0.05       |     |     | 0.020                                        | 0.53   |     |     | 0.77   | *   |     | -0.12     |    |     | 0.15   |    |     | 0.384            |



| Chemicals   | Overall<br>(n=2,284) |     |     | Interaction by infant sex |    |     |            |     |     |                  | Interaction by maternal race/ethnicity group |     |     |        |     |     |           |     |     |        |    |     |                  |
|-------------|----------------------|-----|-----|---------------------------|----|-----|------------|-----|-----|------------------|----------------------------------------------|-----|-----|--------|-----|-----|-----------|-----|-----|--------|----|-----|------------------|
|             | beta                 | p   | FDR | Boys Only                 |    |     | Girls Only |     |     |                  | Whites                                       |     |     | Blacks |     |     | Hispanics |     |     | Asians |    |     | P <sub>int</sub> |
|             |                      |     |     | beta                      | p  | FDR | beta       | p   | FDR | P <sub>int</sub> | beta                                         | p   | FDR | beta   | p   | FDR | beta      | p   | FDR | beta   | p  | FDR |                  |
| PCB 118/106 | 0.13                 |     |     | 0.45                      | .  |     | -0.07      |     |     | 0.103            | 0.37                                         |     |     | 0.45   |     |     | -1.26     | **  |     | 0.20   |    |     | 0.009            |
| PCB 105/127 | 0.19                 |     |     | 0.58                      | *  | .   | -0.03      |     |     | 0.056            | 0.48                                         | .   |     | 0.50   |     |     | -1.14     | *   |     | 0.23   |    |     | 0.010            |
| PCB 114/122 | 0.32                 | *   |     | 0.62                      | ** | *   | 0.15       |     |     | 0.096            | 0.24                                         |     |     | 0.49   | *   |     | -0.63     |     |     | 0.98   | *  |     | 0.048            |
| PCB 128     | -0.02                |     |     | 0.00                      |    |     | -0.03      |     |     | 0.909            | 0.00                                         |     |     | 0.34   |     |     | -0.62     | *   |     | 0.13   |    |     | 0.090            |
| PCB 137     | -0.09                |     |     | 0.08                      |    |     | -0.18      |     |     | 0.418            | 0.02                                         |     |     | 0.12   |     |     | -1.30     | **  |     | 0.11   |    |     | 0.036            |
| PCB 138/158 | -0.08                |     |     | -0.08                     |    |     | -0.08      |     |     | 0.971            | -0.17                                        |     |     | 0.04   |     |     | -0.98     | .   |     | 0.16   |    |     | 0.186            |
| PCB 146/161 | -0.09                |     |     | -0.11                     |    |     | -0.07      |     |     | 0.870            | -0.41                                        |     |     | 0.48   |     |     | -0.85     | *   |     | 0.06   |    |     | 0.073            |
| PCB 153     | -0.06                |     |     | -0.08                     |    |     | -0.05      |     |     | 0.885            | -0.37                                        |     |     | 0.25   |     |     | -0.63     |     |     | 0.19   |    |     | 0.231            |
| PCB 156     | 0.32                 | *   |     | 0.43                      | *  | .   | 0.15       |     |     | 0.309            | 0.21                                         |     |     | 0.31   |     |     | 0.50      |     |     | 0.61   | .  |     | 0.732            |
| PCB 157     | 0.03                 |     |     | 0.34                      | .  |     | -0.46      | *   |     | 0.004            | 0.16                                         |     |     | -0.33  |     |     | -0.46     |     |     | 0.18   |    |     | 0.370            |
| PCB 167     | -0.14                |     |     | -0.12                     |    |     | -0.16      |     |     | 0.914            | -0.02                                        |     |     | -0.11  |     |     | -1.39     | **  |     | 0.14   |    |     | 0.014            |
| PCB 170     | 0.06                 |     |     | -0.09                     |    |     | 0.47       | .   |     | 0.050            | -0.14                                        |     |     | 0.42   |     |     | 0.53      |     |     | 0.55   | .  |     | 0.162            |
| PCB 172/192 | -0.01                |     |     | -0.17                     |    |     | 0.28       |     |     | 0.114            | -0.32                                        |     |     | 0.59   |     |     | -0.48     |     |     | 0.43   |    |     | 0.045            |
| PCB 177     | -0.09                |     |     | -0.28                     |    |     | 0.10       |     |     | 0.194            | -0.28                                        |     |     | 0.64   |     |     | -0.41     |     |     | -0.05  |    |     | 0.406            |
| PCB 180     | 0.10                 |     |     | -0.03                     |    |     | 0.39       |     |     | 0.132            | -0.17                                        |     |     | 0.40   |     |     | 0.16      |     |     | 0.63   | *  |     | 0.104            |
| PCB 182/187 | 0.04                 |     |     | -0.03                     |    |     | 0.07       |     |     | 0.773            | -0.20                                        |     |     | 0.82   |     |     | -2.08     | *   |     | 0.13   |    |     | 0.044            |
| PCB 183     | -0.02                |     |     | -0.14                     |    |     | 0.09       |     |     | 0.434            | -0.23                                        |     |     | 0.74   |     |     | -1.06     | .   |     | 0.14   |    |     | 0.096            |
| PCB 194     | 0.07                 |     |     | -0.02                     |    |     | 0.40       |     |     | 0.183            | -0.11                                        |     |     | -0.03  |     |     | 0.54      |     |     | 0.73   | *  |     | 0.098            |
| PCB 195     | 0.02                 |     |     | -0.10                     |    |     | 0.33       |     |     | 0.147            | -0.22                                        |     |     | 0.00   |     |     | 1.23      | .   |     | 0.43   |    |     | 0.065            |
| PCB 196/203 | -0.06                |     |     | -0.09                     |    |     | 0.01       |     |     | 0.704            | -0.28                                        |     |     | 0.06   |     |     | 0.20      |     |     | 0.37   |    |     | 0.247            |
| PCB 199     | -0.03                |     |     | -0.05                     |    |     | -0.01      |     |     | 0.855            | -0.26                                        |     |     | 0.07   |     |     | -0.67     |     |     | 0.37   |    |     | 0.180            |
| PCB 202     | 0.08                 |     |     | 0.30                      |    |     | -0.04      |     |     | 0.356            | -0.04                                        |     |     | 0.31   |     |     | -1.17     |     |     | 0.15   |    |     | 0.328            |
| PCB 206     | -0.07                |     |     | -0.04                     |    |     | -0.11      |     |     | 0.859            | -0.46                                        |     |     | 0.42   |     |     | 0.03      |     |     | 0.08   |    |     | 0.308            |
| PCB 208     | -0.20                |     |     | -0.21                     |    |     | -0.22      |     |     | 1.000            | -0.74                                        | .   |     | -0.43  |     |     | 0.17      |     |     | 0.04   |    |     | 0.369            |
| PCB 209     | 0.25                 |     |     | 0.79                      | *  | .   | -0.14      |     |     | 0.023            | -0.16                                        |     |     | 0.03   |     |     | 1.21      | *   |     | 0.15   |    |     | 0.184            |
| NMeFOSAA    | 0.02                 |     |     | 0.15                      |    |     | -0.08      |     |     | 0.387            | 0.04                                         |     |     | 0.12   |     |     | -0.31     |     |     | 0.27   |    |     | 0.568            |
| PFDA        | 0.43                 | **  |     | 0.62                      | ** | *   | 0.27       |     |     | 0.211            | 1.01                                         | *** | *   | 0.21   |     |     | 0.00      |     |     | 0.42   |    |     | 0.067            |
| PFDoDA      | 0.24                 | .   |     | 0.74                      | ** | *   | 0.08       |     |     | 0.020            | 1.40                                         | *** | *   | 0.52   | *   |     | -0.22     |     |     | 0.52   |    |     | <0.001           |
| PFDS        | -0.01                |     |     | -0.09                     |    |     | 0.11       |     |     | 0.464            | -0.43                                        |     |     | 0.00   |     |     | -1.08     | *   |     | 0.33   |    |     | 0.044            |
| PFHpA       | 0.45                 | *** |     | 0.12                      |    |     | 0.75       | *** | **  | 0.015            | 0.99                                         | *** | *** | 0.70   | *   |     | 0.14      |     |     | -0.34  |    |     | 0.002            |
| PFHxS       | 0.11                 |     |     | -0.03                     |    |     | 0.25       |     |     | 0.287            | 0.35                                         |     |     | -0.88  | *** | .   | 1.26      | *** | .   | 0.13   |    |     | <0.001           |
| PFNA        | 0.28                 | *   |     | 0.22                      |    |     | 0.33       | .   |     | 0.680            | 0.63                                         | *   |     | 0.01   |     |     | 0.07      |     |     | 0.48   |    |     | 0.299            |
| PFOA        | 0.16                 |     |     | -0.21                     |    |     | 0.50       | *   |     | 0.007            | 0.38                                         |     |     | 0.47   |     |     | 0.04      |     |     | -0.42  |    |     | 0.126            |
| PFOS        | 0.38                 | **  |     | 0.56                      | ** | *   | 0.21       |     |     | 0.174            | 0.13                                         |     |     | 0.09   |     |     | 0.52      |     |     | 0.88   | ** |     | 0.165            |
| PFOSA       | -0.15                |     |     | 0.21                      |    |     | -0.70      | *** | .   | <0.001           | -1.01                                        | *** | *   | -0.38  |     |     | -0.41     |     |     | 0.74   | ** |     | <0.001           |
| PFUnDA      | 0.16                 |     |     | 0.39                      | .  |     | -0.03      |     |     | 0.111            | 0.13                                         |     |     | 0.23   |     |     | -0.86     | *   |     | 0.49   | *  |     | 0.033            |

P-values: \*\*\*<0.001 ; \*\*0.001-0.01 ; \*<0.01-0.05 ; . 0.05-0.1

FDR: p-values after false discovery rate correction (\*\*\*<0.001 ; \*\*0.001-0.01 ; \*<0.01-0.05 ; . 0.05-0.1)

P<sub>int</sub>: p-values of interaction

Adjusted for maternal race/ethnicity (White, Black, Hispanic, Asian), maternal age (years, continuous), pre-pregnancy BMI (kg/m<sup>2</sup>, continuous), parity (0,1,2, 3 or more), highest level of education (Less than high school, High school diploma or GED or equivalent, Some college or Associate degree, Bachelors degree, Masters degree or Advanced degree), marital status (not married vs. living as married), infant sex (male, female), gestational age at the time of ultrasound (continuous), total serum lipids (except for PFASs, ng/mL, continuous) and log transformed plasma cotinine level (log(x+1), continuous), with repeated measurements of fetal growth (random effect variable corresponding to the mother-child pair), and with a smooth function for the gestational age.

**eTable 11: Association between EDCs and longitudinal humerus length using a generalized additive mixed model, NICHD Fetal Growth Studies – Singletons (n=2,284).**

| Chemicals       | Overall<br>(n=2,284) |     |     | Interaction by infant sex |     |     |            |     |     | Interaction by maternal race/ethnicity group |        |     |     |        |     |     |           |     |     |        |     |     |                  |
|-----------------|----------------------|-----|-----|---------------------------|-----|-----|------------|-----|-----|----------------------------------------------|--------|-----|-----|--------|-----|-----|-----------|-----|-----|--------|-----|-----|------------------|
|                 | beta                 | p   | FDR | Boys Only                 |     |     | Girls Only |     |     | P <sub>int</sub>                             | Whites |     |     | Blacks |     |     | Hispanics |     |     | Asians |     |     | P <sub>int</sub> |
|                 |                      |     |     | beta                      | p   | FDR | beta       | p   | FDR |                                              | beta   | p   | FDR | beta   | p   | FDR | beta      | p   | FDR | beta   | p   | FDR |                  |
| β-HCH           | 0.09                 | *** | **  | 0.11                      | **  | **  | 0.07       | *   |     | 0.465                                        | 0.29   |     |     | -0.18  |     |     | -0.59     | *** | .   | 0.11   | *** | *** | <0.001           |
| γ-HCH           | 0.05                 | *   |     | 0.06                      | *   | .   | 0.02       |     |     | 0.702                                        | -0.19  |     |     | 0.49   |     |     | -1.97     | *   |     | 0.05   | *   |     | 0.091            |
| HCB             | -0.02                |     |     | -0.02                     |     |     | -0.22      |     |     | 0.226                                        | 0.25   |     |     | -0.76  | **  | .   | -0.21     |     |     | -0.02  |     |     | 0.030            |
| Oxychlorthane   | -0.02                |     |     | -0.91                     | **  | **  | -0.01      |     |     | 0.002                                        | -0.29  |     |     | -0.75  | .   |     | -1.75     | **  |     | 0.00   |     |     | 0.002            |
| Trans-chlordane | -0.01                |     |     | -0.02                     |     |     | 0.02       |     |     | 0.490                                        | 0.68   |     |     | 1.47   | *   |     | 1.27      |     |     | -0.01  |     |     | 0.147            |
| Trans-nonachlor | -0.01                |     |     | -0.06                     |     |     | 0.00       |     |     | 0.544                                        | -0.04  |     |     | -0.05  |     |     | -0.02     |     |     | 0.00   |     |     | 0.954            |
| p,p'-DDE        | -0.13                | *** | *** | -0.19                     | *** | *** | -0.07      | *   |     | 0.006                                        | -0.72  | *** | *** | -0.37  | *** | **  | -0.12     | *** |     | -0.03  |     |     | <0.001           |
| o,p'-DDD        | -0.04                | .   |     | 0.03                      |     |     | -0.07      | **  |     | 0.020                                        | 0.00   |     |     | -0.09  | *   |     | 0.09      | .   |     | -0.07  | *   |     | 0.017            |
| p,p'-DDD        | 0.04                 | .   |     | 0.00                      |     |     | 0.08       | *   |     | 0.121                                        | 0.04   |     |     | -0.07  |     |     | 0.00      |     |     | 0.08   | **  | .   | 0.224            |
| p,p'-DDT        | 0.03                 |     |     | -0.02                     |     |     | 0.09       | **  |     | 0.014                                        | 0.57   | .   |     | -0.41  | **  |     | 0.00      |     |     | 0.11   | **  | *   | <0.001           |
| Mirex           | -0.06                | **  | .   | -0.11                     | *** | **  | 0.00       |     |     | 0.011                                        | 0.20   | *   |     | -0.12  |     |     | -0.05     | .   |     | -0.17  | *** | **  | <0.001           |
| PBB 153         | 0.00                 |     |     | 0.01                      |     |     | -0.03      |     |     | 0.323                                        | -0.03  |     |     | -0.01  |     |     | 0.05      |     |     | 0.01   |     |     | 0.677            |
| PBDE 28         | -0.05                | *   |     | -0.03                     |     |     | -0.15      | **  |     | 0.033                                        | -0.47  | *** | *** | -0.07  | *   |     | 0.02      |     |     | -0.02  |     |     | <0.001           |
| PBDE 47         | -0.06                | **  | .   | 0.00                      |     |     | -0.12      | *** | **  | 0.004                                        | -0.15  | *** | **  | 0.00   |     |     | -0.05     |     |     | -0.04  |     |     | 0.087            |
| PBDE 85         | -0.03                |     |     | -0.01                     |     |     | -0.07      | .   |     | 0.200                                        | -0.08  | *   |     | 0.18   | *** | **  | -0.04     |     |     | -0.20  | **  | *   | <0.001           |
| PBDE 99         | 0.03                 |     |     | 0.04                      |     |     | 0.00       |     |     | 0.349                                        | -0.06  |     |     | 0.07   | *   |     | -0.07     |     |     | 0.13   | *   |     | 0.008            |
| PBDE 100        | -0.09                | *** | *** | -0.06                     | *   | .   | -0.13      | *** | **  | 0.075                                        | -0.15  | *** | *   | -0.10  | **  | .   | -0.05     |     |     | -0.06  |     |     | 0.311            |
| PBDE 153        | -0.04                | .   |     | -0.01                     |     |     | -0.07      | *   |     | 0.195                                        | -0.05  | .   |     | -0.04  |     |     | -0.03     |     |     | 0.00   |     |     | 0.921            |
| PBDE 154        | -0.02                |     |     | 0.01                      |     |     | -0.07      | *   |     | 0.058                                        | -0.07  | .   |     | 0.05   |     |     | 0.00      |     |     | -0.09  |     |     | 0.155            |
| PBDE 183        | 0.05                 | *   |     | 0.05                      | *   | .   | 0.05       |     |     | 0.964                                        | 0.05   |     |     | 0.10   |     |     | 0.05      |     |     | 0.05   |     |     | 0.514            |
| PBDE 209        | -0.06                | **  | *   | -0.02                     |     |     | -0.13      | *** | **  | 0.009                                        | -0.02  |     |     | -0.13  |     |     | -0.02     |     |     | -0.02  |     |     | <0.001           |
| PCB 5/8         | 0.04                 |     |     | 0.08                      | *   | .   | 0.01       |     |     | 0.157                                        | 0.26   |     |     | 0.19   | **  |     | 0.04      |     |     | -0.04  |     |     | 0.063            |
| PCB 18/17       | 0.06                 | **  | *   | 0.06                      | **  | *   | 0.65       | **  |     | 0.018                                        | 0.06   | **  | *   | 1.78   | *** | *** | 0.02      |     |     | -1.61  |     |     | <0.001           |
| PCB 22          | 0.08                 | *** | *   | 0.08                      | **  | *   | 0.10       | **  |     | 0.591                                        | 0.24   | **  | .   | 0.33   | *** | *** | 0.04      |     |     | -0.05  |     |     | <0.001           |
| PCB 31/28       | 0.10                 | *** | *** | 0.10                      | *** | **  | 0.10       | *   |     | 0.956                                        | 0.18   | *   |     | 0.32   | *** | *** | 0.04      |     |     | 0.12   | *   |     | <0.001           |
| PCB 33/20       | 0.07                 | **  | *   | 0.07                      | *   | *   | 0.09       | *   |     | 0.694                                        | 0.24   | **  | .   | 0.35   | *** | *** | 0.04      |     |     | -0.10  |     |     | <0.001           |
| PCB 37          | 0.11                 | *** | *** | 0.10                      | *** | **  | 0.12       | **  | *   | 0.776                                        | 0.25   | **  | *   | 0.37   | *** | *** | 0.05      | .   |     | 0.00   |     |     | <0.001           |
| PCB 41/64       | 0.09                 | *** | *   | 0.19                      | *** | *** | 0.05       |     |     | 0.013                                        | 0.37   | *** | **  | 0.20   | *** | **  | 0.05      |     |     | -0.01  |     |     | <0.001           |
| PCB 44          | 0.06                 | *   |     | 0.17                      | *** | **  | 0.02       |     |     | 0.013                                        | 0.27   | **  | .   | 0.18   | *** | **  | 0.01      |     |     | -0.03  |     |     | <0.001           |
| PCB 47/48/75    | 0.06                 | *   |     | 0.17                      | *** | **  | 0.03       |     |     | 0.017                                        | 0.31   | **  | *   | 0.15   | *** | *   | 0.02      |     |     | -0.03  |     |     | 0.002            |
| PCB 49/43       | 0.06                 | *   |     | 0.14                      | **  | **  | 0.03       |     |     | 0.037                                        | 0.27   | **  | *   | 0.17   | *** | **  | 0.02      |     |     | -0.04  |     |     | <0.001           |
| PCB 52/73       | 0.03                 |     |     | 0.18                      | *   | *   | 0.00       |     |     | 0.032                                        | 0.34   | *   |     | 0.18   | *   |     | 0.05      |     |     | -0.02  |     |     | 0.041            |
| PCB 66/80       | 0.11                 | *** | *** | 0.19                      | *** | *** | 0.04       |     |     | 0.003                                        | 0.31   | *** | **  | 0.19   | *** | **  | 0.08      | .   |     | 0.00   |     |     | <0.001           |
| PCB 70/76       | 0.08                 | **  | *   | 0.15                      | *** | **  | 0.03       |     |     | 0.026                                        | 0.23   | **  |     | 0.19   | *** | **  | 0.05      |     |     | -0.03  |     |     | 0.004            |
| PCB 74/61       | 0.02                 |     |     | 0.03                      |     |     | 0.02       |     |     | 0.847                                        | 0.08   |     |     | 0.11   | .   |     | 0.10      |     |     | -0.06  |     |     | 0.037            |
| PCB 90/101/89   | 0.05                 |     |     | 0.20                      | **  | **  | 0.01       |     |     | 0.009                                        | 0.41   | *** | *   | 0.21   | **  | *   | 0.04      |     |     | -0.03  |     |     | <0.001           |
| PCB 93/95       | 0.03                 |     |     | 0.53                      | *** | **  | 0.01       |     |     | 0.002                                        | 1.10   | *** | *   | 0.70   | *** | **  | 0.00      |     |     | -0.01  |     |     | <0.001           |
| PCB 99          | 0.01                 |     |     | 0.08                      |     |     | 0.00       |     |     | 0.295                                        | 0.34   | *** | *** | 0.09   |     |     | 0.21      | .   |     | -0.09  | *   |     | <0.001           |
| PCB 85/120      | 0.07                 | **  | .   | 0.16                      | *** | **  | 0.03       |     |     | 0.016                                        | 0.23   | *** | *   | 0.11   | *   |     | 0.16      | *   |     | -0.03  |     |     | 0.010            |
| PCB 110         | 0.06                 | *   |     | 0.20                      | *** | **  | 0.01       |     |     | 0.003                                        | 0.35   | *** | *   | 0.17   | **  | .   | 0.10      |     |     | -0.02  |     |     | 0.002            |

| Chemicals   | Overall<br>(n=2,284) |     |     | Interaction by infant sex |     |     |            |     |     | Interaction by maternal race/ethnicity group |        |     |     |        |     |     |           |   |     |        |     |     |                  |
|-------------|----------------------|-----|-----|---------------------------|-----|-----|------------|-----|-----|----------------------------------------------|--------|-----|-----|--------|-----|-----|-----------|---|-----|--------|-----|-----|------------------|
|             | beta                 | p   | FDR | Boys Only                 |     |     | Girls Only |     |     | P <sub>int</sub>                             | Whites |     |     | Blacks |     |     | Hispanics |   |     | Asians |     |     | P <sub>int</sub> |
|             |                      |     |     | beta                      | p   | FDR | beta       | p   | FDR |                                              | beta   | p   | FDR | beta   | p   | FDR | beta      | p | FDR | beta   | p   | FDR |                  |
| PCB 118/106 | 0.02                 |     |     | 0.06                      |     |     | 0.00       |     |     | 0.259                                        | 0.20   | *** | *** | 0.02   |     |     | 0.06      |   |     | -0.15  | *** | **  | <0.001           |
| PCB 105/127 | 0.02                 |     |     | 0.07                      |     |     | -0.01      |     |     | 0.169                                        | 0.20   | *** | *** | 0.02   |     |     | 0.08      |   |     | -0.14  | *** | **  | <0.001           |
| PCB 114/122 | 0.02                 |     |     | 0.09                      | *   | .   | -0.02      |     |     | 0.031                                        | 0.09   | **  |     | -0.04  |     |     | 0.09      |   |     | -0.14  | .   |     | 0.007            |
| PCB 128     | -0.04                | .   |     | -0.03                     |     |     | -0.05      |     |     | 0.629                                        | 0.07   |     |     | -0.01  |     |     | -0.01     |   |     | -0.24  | *** | *** | <0.001           |
| PCB 137     | -0.01                |     |     | 0.01                      |     |     | -0.02      |     |     | 0.623                                        | 0.06   |     |     | 0.04   |     |     | 0.05      |   |     | -0.12  | **  | .   | 0.019            |
| PCB 138/158 | -0.06                | *   |     | -0.08                     | *   | .   | -0.05      |     |     | 0.438                                        | 0.09   | *   |     | -0.09  |     |     | 0.06      |   |     | -0.21  | *** | *** | <0.001           |
| PCB 146/161 | -0.09                | **  | *   | -0.09                     | *   | .   | -0.09      | *   |     | 0.831                                        | 0.16   | *   |     | -0.06  |     |     | 0.04      |   |     | -0.24  | *** | *** | <0.001           |
| PCB 153     | -0.06                | *   |     | -0.08                     | *   | .   | -0.05      |     |     | 0.513                                        | 0.08   | .   |     | -0.04  |     |     | 0.09      |   |     | -0.21  | *** | *** | <0.001           |
| PCB 156     | -0.02                |     |     | -0.02                     |     |     | -0.02      |     |     | 0.840                                        | 0.03   |     |     | -0.16  | *   |     | 0.05      |   |     | -0.17  | **  | *   | 0.002            |
| PCB 157     | -0.03                |     |     | 0.00                      |     |     | -0.09      | *   |     | 0.074                                        | 0.06   | .   |     | -0.19  | **  | .   | -0.04     |   |     | -0.17  | *** | **  | <0.001           |
| PCB 167     | -0.10                | *** | **  | -0.09                     | *   | *   | -0.11      | **  |     | 0.750                                        | 0.08   | .   |     | -0.21  | **  | .   | -0.17     | * |     | -0.21  | *** | *** | <0.001           |
| PCB 170     | -0.06                | *   |     | -0.06                     | *   | .   | -0.06      |     |     | 0.888                                        | 0.00   |     |     | -0.15  |     |     | -0.08     |   |     | -0.22  | *** | *** | 0.002            |
| PCB 172/192 | -0.08                | **  | .   | -0.07                     | *   | .   | -0.08      | *   |     | 0.935                                        | -0.01  |     |     | 0.04   |     |     | -0.16     | * |     | -0.17  | *** | **  | 0.012            |
| PCB 177     | -0.05                | *   |     | -0.07                     | .   |     | -0.04      |     |     | 0.480                                        | 0.08   | .   |     | 0.07   |     |     | 0.00      |   |     | -0.19  | *** | *** | <0.001           |
| PCB 180     | -0.07                | **  | .   | -0.07                     | *   | *   | -0.06      |     |     | 0.661                                        | 0.00   |     |     | -0.06  |     |     | -0.06     |   |     | -0.21  | *** | *** | 0.002            |
| PCB 182/187 | -0.03                |     |     | -0.06                     |     |     | -0.02      |     |     | 0.493                                        | 0.10   |     |     | 0.25   | *   |     | 0.14      |   |     | -0.11  | **  | *   | <0.001           |
| PCB 183     | -0.02                |     |     | -0.04                     |     |     | -0.01      |     |     | 0.556                                        | 0.06   |     |     | 0.21   | *   |     | -0.06     |   |     | -0.13  | *** | *   | <0.001           |
| PCB 194     | -0.04                | .   |     | -0.03                     |     |     | -0.05      |     |     | 0.767                                        | 0.00   |     |     | 0.02   |     |     | -0.02     |   |     | -0.22  | *** | *** | 0.002            |
| PCB 195     | -0.02                |     |     | -0.03                     |     |     | 0.00       |     |     | 0.552                                        | 0.03   |     |     | 0.07   |     |     | 0.00      |   |     | -0.17  | *** | **  | 0.003            |
| PCB 196/203 | -0.06                | *   |     | -0.04                     |     |     | -0.09      | *   |     | 0.350                                        | 0.00   |     |     | -0.01  |     |     | 0.06      |   |     | -0.21  | *** | *** | 0.002            |
| PCB 199     | -0.06                | *   |     | -0.05                     |     |     | -0.08      | *   |     | 0.490                                        | 0.02   |     |     | -0.03  |     |     | -0.01     |   |     | -0.20  | *** | *** | <0.001           |
| PCB 202     | -0.06                | *   |     | -0.05                     |     |     | -0.07      | .   |     | 0.912                                        | 0.10   |     |     | 0.07   |     |     | 0.04      |   |     | -0.15  | *** | **  | 0.002            |
| PCB 206     | -0.07                | *   |     | -0.08                     | *   | .   | -0.05      |     |     | 0.570                                        | 0.03   |     |     | 0.06   |     |     | 0.16      |   |     | -0.30  | *** | *** | <0.001           |
| PCB 208     | -0.15                | *** | *** | -0.14                     | **  | **  | -0.16      | *** | *   | 0.915                                        | -0.01  |     |     | -0.08  |     |     | 0.03      |   |     | -0.28  | *** | *** | <0.001           |
| PCB 209     | -0.08                | *   |     | -0.07                     |     |     | -0.09      | .   |     | 0.821                                        | -0.01  |     |     | -0.13  | .   |     | 0.21      | * |     | -0.22  | *** | **  | <0.001           |
| NMeFOSAA    | 0.04                 | .   |     | 0.17                      | *** | *** | -0.08      | *   |     | <0.001                                       | 0.05   |     |     | 0.13   | **  | *   | -0.09     | . |     | 0.06   |     |     | 0.011            |
| PFDA        | 0.07                 | **  | *   | 0.04                      |     |     | 0.10       | **  | *   | 0.217                                        | 0.36   | *** | *** | 0.13   | **  | *   | 0.01      |   |     | -0.29  | *** | *** | <0.001           |
| PFDoDA      | 0.00                 |     |     | -0.03                     |     |     | 0.01       |     |     | 0.484                                        | 0.30   | *** | *** | 0.13   | **  | *   | -0.02     |   |     | -0.38  | *** | *** | <0.001           |
| PFDS        | -0.07                | **  | .   | -0.06                     | .   |     | -0.08      | *   |     | 0.689                                        | 0.10   |     |     | -0.02  |     |     | 0.00      |   |     | -0.17  | *** | *** | <0.001           |
| PFHpA       | 0.16                 | *** | *** | 0.08                      | *   | *   | 0.24       | *** | *** | <0.001                                       | 0.20   | *** | *** | 0.37   | *** | *** | 0.00      |   |     | 0.18   | *** | **  | <0.001           |
| PFHxS       | 0.13                 | *** | *** | 0.11                      | *** | **  | 0.14       | *** | **  | 0.568                                        | 0.18   | *** | *** | 0.03   |     |     | 0.11      | . |     | 0.20   | **  | *   | 0.038            |
| PFNA        | 0.07                 | **  | *   | 0.01                      |     |     | 0.12       | *** | **  | 0.012                                        | 0.35   | *** | *** | 0.11   | **  |     | 0.02      |   |     | -0.26  | *** | *** | <0.001           |
| PFOA        | 0.12                 | *** | *** | 0.06                      | .   |     | 0.17       | *** | *** | 0.008                                        | 0.19   | *** | *** | 0.20   | *** | **  | -0.01     |   |     | 0.06   |     |     | <0.001           |
| PFOS        | 0.02                 |     |     | 0.04                      |     |     | -0.01      |     |     | 0.171                                        | 0.30   | *** | *** | 0.07   |     |     | 0.03      |   |     | -0.35  | *** | *** | <0.001           |
| PFOSA       | -0.13                | *** | *** | -0.08                     | **  | *   | -0.20      | *** | *** | 0.005                                        | -0.07  |     |     | -0.21  | *** | *** | -0.03     |   |     | -0.14  | *** | **  | 0.030            |
| PFUnDA      | 0.00                 |     |     | -0.02                     |     |     | 0.01       |     |     | 0.442                                        | 0.39   | *** | *** | 0.07   | .   |     | 0.07      |   |     | -0.27  | *** | *** | <0.001           |

P-values: \*\*\*<0.001 ; \*\*0.001-0.01 ; \*<0.01-0.05 ; . 0.05-0.1

FDR: p-values after false discovery rate correction (\*\*\*<0.001 ; \*\*0.001-0.01 ; \*<0.01-0.05 ; . 0.05-0.1)

P<sub>int</sub>: p-values of interaction

Adjusted for maternal race/ethnicity (White, Black, Hispanic, Asian), maternal age (years, continuous), pre-pregnancy BMI (kg/m<sup>2</sup>, continuous), parity (0,1,2, 3 or more), highest level of education (Less than high school, High school diploma or GED or equivalent, Some college or Associate degree, Bachelors degree, Masters degree or Advanced degree), marital status (not married vs. living as married), infant sex (male, female), gestational age at the time of ultrasound (continuous), total serum lipids (except for PFASs, ng/mL, continuous) and log transformed plasma cotinine level (log(x+1), continuous), with repeated measurements of fetal growth (random effect variable corresponding to the mother-child pair), and with a smooth function for the gestational age.

**eTable 12: Association between EDCs and longitudinal radial length using a generalized additive mixed model, NICHD Fetal Growth Studies – Singletons (n=2,284).**

| Chemicals       | Overall<br>(n=2,284) |     |     | Interaction by infant sex |     |     |            |     |     |                  | Interaction by maternal race/ethnicity group |     |     |        |     |     |           |     |     |        |     |     |                  |
|-----------------|----------------------|-----|-----|---------------------------|-----|-----|------------|-----|-----|------------------|----------------------------------------------|-----|-----|--------|-----|-----|-----------|-----|-----|--------|-----|-----|------------------|
|                 | beta                 | p   | FDR | Boys Only                 |     |     | Girls Only |     |     |                  | Whites                                       |     |     | Blacks |     |     | Hispanics |     |     | Asians |     |     | P <sub>int</sub> |
|                 |                      |     |     | beta                      | p   | FDR | beta       | p   | FDR | P <sub>int</sub> | beta                                         | p   | FDR | beta   | p   | FDR | beta      | p   | FDR | beta   | p   | FDR |                  |
| β-HCH           | 0.10                 | *** | *   | 0.18                      | *** | *** | 0.04       |     |     | 0.006            | 0.08                                         |     |     | -0.84  | *   |     | -0.62     | *** | .   | 0.12   | *** | *** | <0.001           |
| γ-HCH           | 0.06                 | *   |     | 0.07                      | **  | *   | -0.02      |     |     | 0.295            | -0.40                                        |     |     | -0.38  |     |     | -1.58     | .   |     | 0.07   | *   |     | 0.332            |
| HCB             | -0.02                |     |     | -0.01                     |     |     | -0.30      |     |     | 0.125            | 0.73                                         |     |     | -0.53  | .   |     | -0.52     | *   |     | -0.01  |     |     | 0.018            |
| Oxychlorodane   | -0.05                |     |     | -1.23                     | *** | **  | -0.01      |     |     | <0.001           | -0.21                                        |     |     | -0.96  | *   |     | -2.53     | *** | *   | -0.01  |     |     | <0.001           |
| Trans-chlordane | -0.01                |     |     | -0.01                     |     |     | 0.04       |     |     | 0.718            | 1.18                                         |     |     | 1.24   |     |     | 1.66      |     |     | 0.00   |     |     | 0.224            |
| Trans-nonachlor | -0.04                |     |     | -0.27                     | *   | .   | 0.00       |     |     | 0.053            | -0.06                                        |     |     | -0.08  |     |     | -0.37     | *   |     | 0.00   |     |     | 0.225            |
| p,p'-DDE        | -0.12                | *** | **  | -0.15                     | *** | *** | -0.09      | *   |     | 0.153            | -0.71                                        | *** | *** | -0.27  | **  | .   | -0.12     | **  |     | -0.01  |     |     | <0.001           |
| o,p'-DDD        | -0.09                | *** | *   | -0.04                     |     |     | -0.12      | *** | *   | 0.093            | -0.10                                        |     |     | -0.09  | .   |     | 0.04      |     |     | -0.15  | *** | *** | 0.021            |
| p,p'-DDD        | 0.04                 |     |     | 0.04                      |     |     | 0.04       |     |     | 0.965            | 0.10                                         |     |     | -0.01  |     |     | 0.00      |     |     | 0.05   |     |     | 0.766            |
| p,p'-DDT        | 0.01                 |     |     | 0.01                      |     |     | 0.01       |     |     | 0.837            | 0.56                                         |     |     | -0.20  |     |     | -0.04     |     |     | 0.10   | *   |     | 0.008            |
| Mirex           | -0.09                | *** | *   | -0.10                     | **  | **  | -0.07      | .   |     | 0.467            | 0.31                                         | *** | **  | -0.03  |     |     | -0.08     | *   |     | -0.26  | *** | *** | <0.001           |
| PBB 153         | 0.01                 |     |     | 0.00                      |     |     | 0.02       |     |     | 0.666            | 0.07                                         | .   |     | -0.08  |     |     | 0.03      |     |     | -0.04  |     |     | 0.180            |
| PBDE 28         | -0.04                | .   |     | -0.02                     |     |     | -0.16      | **  |     | 0.031            | -0.25                                        | *   |     | -0.05  |     |     | 0.02      |     |     | -0.06  |     |     | 0.135            |
| PBDE 47         | -0.06                | *   |     | 0.00                      |     |     | -0.12      | *** | *   | 0.009            | -0.12                                        | **  | .   | 0.07   |     |     | -0.06     |     |     | -0.10  | *   |     | 0.021            |
| PBDE 85         | -0.03                |     |     | -0.01                     |     |     | -0.07      | .   |     | 0.153            | -0.07                                        | .   |     | 0.23   | *** | **  | -0.03     |     |     | -0.32  | *** | *** | <0.001           |
| PBDE 99         | 0.02                 |     |     | 0.04                      |     |     | -0.03      |     |     | 0.160            | -0.11                                        | *   |     | 0.09   | *   |     | -0.06     |     |     | 0.07   |     |     | 0.005            |
| PBDE 100        | -0.11                | *** | *** | -0.07                     | *   | .   | -0.15      | *** | *** | 0.065            | -0.18                                        | *** | **  | -0.10  | *   |     | -0.06     |     |     | -0.13  | *   |     | 0.279            |
| PBDE 153        | -0.08                | **  | *   | -0.06                     | .   |     | -0.09      | *   |     | 0.598            | -0.08                                        | *   |     | -0.06  |     |     | -0.09     |     |     | -0.08  |     |     | 0.973            |
| PBDE 154        | -0.02                |     |     | 0.02                      |     |     | -0.05      |     |     | 0.129            | -0.02                                        |     |     | 0.11   | *   |     | -0.03     |     |     | -0.15  | *   |     | 0.013            |
| PBDE 183        | 0.08                 | *** | *   | 0.10                      | *** | **  | 0.04       |     |     | 0.217            | 0.09                                         |     |     | -0.04  |     |     | 0.09      |     |     | 0.09   |     |     | 0.104            |
| PBDE 209        | -0.08                | **  | *   | -0.07                     | *   | .   | -0.09      | *   |     | 0.675            | -0.07                                        |     |     | -0.09  |     |     | -0.07     |     |     | -0.07  |     |     | 0.004            |
| PCB 5/8         | 0.04                 |     |     | 0.07                      |     |     | 0.03       |     |     | 0.432            | 0.14                                         |     |     | 0.29   | *** | **  | 0.02      |     |     | -0.06  |     |     | 0.008            |
| PCB 18/17       | 0.05                 | *   |     | 0.05                      | *   | .   | 0.58       | *   |     | 0.075            | 0.05                                         | *   |     | 2.02   | *** | *** | -0.26     |     |     | -1.63  |     |     | <0.001           |
| PCB 22          | 0.07                 | **  | .   | 0.06                      | .   |     | 0.10       | *   |     | 0.447            | 0.21                                         | *   |     | 0.34   | *** | *** | 0.03      |     |     | -0.09  |     |     | <0.001           |
| PCB 31/28       | 0.10                 | *** | **  | 0.11                      | *** | **  | 0.09       | *   |     | 0.635            | 0.18                                         | .   |     | 0.33   | *** | *** | 0.03      |     |     | 0.14   | *   |     | <0.001           |
| PCB 33/20       | 0.06                 | *   |     | 0.05                      |     |     | 0.09       | *   |     | 0.458            | 0.20                                         | *   |     | 0.36   | *** | *** | 0.03      |     |     | -0.14  | .   |     | <0.001           |
| PCB 37          | 0.09                 | *** | *   | 0.09                      | **  | *   | 0.11       | **  |     | 0.687            | 0.21                                         | *   |     | 0.37   | *** | *** | 0.04      |     |     | -0.05  |     |     | <0.001           |
| PCB 41/64       | 0.11                 | *** | *   | 0.21                      | *** | *** | 0.07       | .   |     | 0.028            | 0.34                                         | *** | *   | 0.23   | *** | *** | 0.06      |     |     | -0.02  |     |     | <0.001           |
| PCB 44          | 0.10                 | **  | *   | 0.19                      | *** | **  | 0.05       |     |     | 0.027            | 0.26                                         | *   |     | 0.23   | *** | *** | 0.06      |     |     | -0.04  |     |     | <0.001           |
| PCB 47/48/75    | 0.10                 | **  | *   | 0.22                      | *** | *** | 0.04       |     |     | 0.006            | 0.34                                         | **  | *   | 0.18   | *** | **  | 0.04      |     |     | -0.02  |     |     | <0.001           |
| PCB 49/43       | 0.10                 | **  | *   | 0.17                      | *** | **  | 0.06       |     |     | 0.086            | 0.27                                         | **  | .   | 0.23   | *** | *** | 0.07      |     |     | -0.07  |     |     | <0.001           |
| PCB 52/73       | 0.06                 |     |     | 0.24                      | **  | *   | 0.03       |     |     | 0.018            | 0.32                                         | .   |     | 0.30   | *** | **  | 0.10      |     |     | -0.03  |     |     | 0.003            |
| PCB 66/80       | 0.13                 | *** | *** | 0.22                      | *** | *** | 0.05       |     |     | <0.001           | 0.32                                         | *** | **  | 0.23   | *** | *** | 0.08      |     |     | 0.01   |     |     | <0.001           |
| PCB 70/76       | 0.11                 | *** | *   | 0.16                      | *** | **  | 0.07       | .   |     | 0.117            | 0.23                                         | *   |     | 0.24   | *** | *** | 0.05      |     |     | -0.04  |     |     | <0.001           |
| PCB 74/61       | 0.05                 | .   |     | 0.08                      | *   | .   | 0.01       |     |     | 0.142            | 0.10                                         | .   |     | 0.19   | **  | .   | 0.09      |     |     | -0.05  |     |     | 0.013            |
| PCB 90/101/89   | 0.09                 | *   |     | 0.26                      | *** | **  | 0.04       |     |     | 0.005            | 0.41                                         | **  | *   | 0.30   | *** | **  | 0.12      |     |     | -0.04  |     |     | <0.001           |
| PCB 93/95       | 0.05                 |     |     | 0.65                      | *** | **  | 0.02       |     |     | <0.001           | 1.03                                         | **  | *   | 0.91   | *** | *** | 0.24      |     |     | -0.01  |     |     | <0.001           |
| PCB 99          | 0.05                 |     |     | 0.19                      | **  | *   | 0.01       |     |     | 0.023            | 0.35                                         | *** | **  | 0.22   | *   |     | 0.32      | *   |     | -0.12  | *   |     | <0.001           |
| PCB 85/120      | 0.10                 | *** | *   | 0.19                      | *** | *** | 0.05       |     |     | 0.020            | 0.22                                         | **  | *   | 0.15   | **  | *   | 0.25      | **  |     | -0.05  |     |     | 0.002            |
| PCB 110         | 0.10                 | **  | .   | 0.24                      | *** | *** | 0.04       |     |     | 0.006            | 0.33                                         | **  | *   | 0.25   | *** | **  | 0.14      |     |     | -0.03  |     |     | <0.001           |

| Chemicals   | Overall<br>(n=2,284) |     |     | Interaction by infant sex |     |     |            |     |     |                  | Interaction by maternal race/ethnicity group |     |     |        |     |     |           |   |     |        |     |     |                  |
|-------------|----------------------|-----|-----|---------------------------|-----|-----|------------|-----|-----|------------------|----------------------------------------------|-----|-----|--------|-----|-----|-----------|---|-----|--------|-----|-----|------------------|
|             | beta                 | p   | FDR | Boys Only                 |     |     | Girls Only |     |     |                  | Whites                                       |     |     | Blacks |     |     | Hispanics |   |     | Asians |     |     | P <sub>int</sub> |
|             |                      |     |     | beta                      | p   | FDR | beta       | p   | FDR | P <sub>int</sub> | beta                                         | p   | FDR | beta   | p   | FDR | beta      | p | FDR | beta   | p   | FDR |                  |
| PCB 118/106 | 0.04                 |     |     | 0.11                      | *   | *   | 0.00       |     |     | 0.064            | 0.17                                         | *** | *   | 0.14   | *   |     | 0.10      |   |     | -0.18  | **  | *   | <0.001           |
| PCB 105/127 | 0.05                 | .   |     | 0.14                      | **  | *   | 0.00       |     |     | 0.025            | 0.19                                         | *** | **  | 0.12   | .   |     | 0.12      |   |     | -0.16  | **  | *   | <0.001           |
| PCB 114/122 | 0.03                 |     |     | 0.09                      | *   | .   | -0.01      |     |     | 0.063            | 0.07                                         | .   |     | 0.01   |     |     | 0.07      |   |     | -0.11  |     |     | 0.176            |
| PCB 128     | 0.00                 |     |     | 0.06                      | .   |     | -0.07      | .   |     | 0.010            | 0.15                                         | **  | *   | 0.05   |     |     | -0.01     |   |     | -0.25  | *** | *** | <0.001           |
| PCB 137     | 0.03                 |     |     | 0.07                      |     |     | 0.01       |     |     | 0.239            | 0.09                                         | .   |     | 0.14   | .   |     | 0.12      |   |     | -0.12  | *   |     | 0.003            |
| PCB 138/158 | 0.01                 |     |     | 0.03                      |     |     | -0.01      |     |     | 0.501            | 0.15                                         | **  | *   | 0.08   |     |     | 0.15      |   |     | -0.21  | *** | *** | <0.001           |
| PCB 146/161 | -0.03                |     |     | 0.02                      |     |     | -0.07      | .   |     | 0.139            | 0.24                                         | *** | *   | 0.09   |     |     | 0.08      |   |     | -0.24  | *** | *** | <0.001           |
| PCB 153     | 0.01                 |     |     | 0.04                      |     |     | -0.02      |     |     | 0.248            | 0.16                                         | **  | *   | 0.14   | .   |     | 0.19      | . |     | -0.22  | *** | *** | <0.001           |
| PCB 156     | 0.01                 |     |     | 0.03                      |     |     | -0.02      |     |     | 0.250            | 0.05                                         |     |     | -0.01  |     |     | 0.06      |   |     | -0.15  | *   |     | 0.055            |
| PCB 157     | 0.00                 |     |     | 0.05                      |     |     | -0.07      |     |     | 0.024            | 0.06                                         | .   |     | -0.09  |     |     | 0.03      |   |     | -0.10  | .   |     | 0.050            |
| PCB 167     | -0.05                |     |     | 0.00                      |     |     | -0.10      | *   |     | 0.086            | 0.11                                         | *   |     | -0.08  |     |     | -0.10     |   |     | -0.18  | *** | **  | <0.001           |
| PCB 170     | 0.01                 |     |     | 0.02                      |     |     | -0.02      |     |     | 0.500            | 0.05                                         | .   |     | 0.10   |     |     | -0.02     |   |     | -0.19  | **  | *   | 0.003            |
| PCB 172/192 | 0.00                 |     |     | 0.03                      |     |     | -0.05      |     |     | 0.128            | 0.08                                         | *   |     | 0.23   | **  | .   | -0.13     |   |     | -0.15  | **  | *   | <0.001           |
| PCB 177     | 0.02                 |     |     | 0.04                      |     |     | 0.01       |     |     | 0.626            | 0.19                                         | *** | **  | 0.23   | *   |     | 0.04      |   |     | -0.21  | *** | *** | <0.001           |
| PCB 180     | 0.00                 |     |     | 0.02                      |     |     | -0.03      |     |     | 0.417            | 0.07                                         | *   |     | 0.16   | .   |     | -0.02     |   |     | -0.20  | *** | **  | <0.001           |
| PCB 182/187 | 0.04                 |     |     | 0.11                      | .   |     | 0.00       |     |     | 0.108            | 0.27                                         | *** | **  | 0.47   | *** | **  | 0.24      |   |     | -0.14  | **  | *   | <0.001           |
| PCB 183     | 0.06                 | .   |     | 0.09                      | *   | .   | 0.03       |     |     | 0.309            | 0.16                                         | *** | *   | 0.41   | *** | *** | 0.00      |   |     | -0.15  | **  | *   | <0.001           |
| PCB 194     | 0.01                 |     |     | 0.02                      |     |     | -0.04      |     |     | 0.278            | 0.05                                         | .   |     | 0.16   |     |     | 0.00      |   |     | -0.21  | *** | **  | <0.001           |
| PCB 195     | 0.03                 |     |     | 0.04                      |     |     | 0.00       |     |     | 0.407            | 0.08                                         | **  |     | 0.23   | *   |     | -0.07     |   |     | -0.18  | **  | *   | <0.001           |
| PCB 196/203 | -0.01                |     |     | 0.02                      |     |     | -0.08      | .   |     | 0.059            | 0.06                                         |     |     | 0.10   |     |     | -0.07     |   |     | -0.25  | *** | *** | <0.001           |
| PCB 199     | -0.01                |     |     | 0.02                      |     |     | -0.07      |     |     | 0.107            | 0.08                                         | *   |     | 0.08   |     |     | -0.04     |   |     | -0.21  | *** | *** | <0.001           |
| PCB 202     | -0.02                |     |     | 0.05                      |     |     | -0.06      |     |     | 0.084            | 0.22                                         | **  | *   | 0.22   | **  |     | 0.02      |   |     | -0.19  | *** | *** | <0.001           |
| PCB 206     | -0.04                |     |     | -0.02                     |     |     | -0.08      | .   |     | 0.290            | 0.10                                         | *   |     | 0.11   |     |     | 0.03      |   |     | -0.34  | *** | *** | <0.001           |
| PCB 208     | -0.11                | **  | .   | -0.06                     |     |     | -0.16      | **  | .   | 0.128            | 0.08                                         |     |     | 0.05   |     |     | 0.03      |   |     | -0.31  | *** | *** | <0.001           |
| PCB 209     | -0.05                |     |     | 0.01                      |     |     | -0.09      | .   |     | 0.206            | 0.09                                         |     |     | 0.04   |     |     | 0.15      | . |     | -0.26  | *** | *** | <0.001           |
| NMeFOSAA    | 0.04                 | .   |     | 0.13                      | *** | **  | -0.05      |     |     | <0.001           | 0.00                                         |     |     | 0.13   | **  | *   | -0.06     |   |     | 0.05   |     |     | 0.020            |
| PFDA        | 0.06                 | *   |     | 0.05                      |     |     | 0.08       | *   |     | 0.593            | 0.34                                         | *** | *** | 0.17   | *** | **  | -0.08     |   |     | -0.29  | *** | *** | <0.001           |
| PFDoDA      | -0.01                |     |     | 0.02                      |     |     | -0.02      |     |     | 0.483            | 0.33                                         | *** | *** | 0.18   | *** | **  | -0.07     | * |     | -0.39  | *** | *** | <0.001           |
| PFDS        | -0.05                | .   |     | -0.03                     |     |     | -0.08      | *   |     | 0.247            | 0.10                                         |     |     | 0.07   |     |     | -0.11     |   |     | -0.19  | *** | *** | <0.001           |
| PFHpA       | 0.13                 | *** | *** | 0.04                      |     |     | 0.21       | *** | *** | <0.001           | 0.16                                         | *** | **  | 0.35   | *** | *** | -0.04     |   |     | 0.16   | **  | .   | <0.001           |
| PFHxS       | 0.06                 | *   |     | 0.03                      |     |     | 0.07       | *   |     | 0.395            | 0.10                                         | *   |     | 0.03   |     |     | -0.13     | * |     | 0.26   | *** | **  | <0.001           |
| PFNA        | 0.07                 | **  | .   | 0.04                      |     |     | 0.10       | **  |     | 0.246            | 0.31                                         | *** | *** | 0.16   | *** | **  | 0.02      |   |     | -0.26  | *** | *** | <0.001           |
| PFOA        | 0.09                 | **  | *   | 0.04                      |     |     | 0.13       | *** | *   | 0.084            | 0.13                                         | **  | *   | 0.22   | *** | **  | -0.08     |   |     | 0.06   |     |     | <0.001           |
| PFOS        | 0.01                 |     |     | 0.03                      |     |     | -0.01      |     |     | 0.331            | 0.29                                         | *** | *** | 0.07   |     |     | -0.09     |   |     | -0.29  | *** | *** | <0.001           |
| PFOSA       | -0.10                | *** | **  | -0.04                     |     |     | -0.20      | *** | *** | 0.001            | -0.08                                        |     |     | -0.19  | *** | **  | 0.03      |   |     | -0.13  | **  | *   | 0.018            |
| PFUnDA      | 0.01                 |     |     | 0.05                      |     |     | -0.01      |     |     | 0.185            | 0.37                                         | *** | *** | 0.14   | **  | *   | 0.02      |   |     | -0.26  | *** | *** | <0.001           |

P-values: \*\*\*<0.001 ; \*\*0.001-0.01 ; \*<0.01-0.05 ; . 0.05-0.1

FDR: p-values after false discovery rate correction (\*\*\*<0.001 ; \*\*0.001-0.01 ; \*<0.01-0.05 ; . 0.05-0.1)

P<sub>int</sub>: p-values of interaction

Adjusted for maternal race/ethnicity (White, Black, Hispanic, Asian), maternal age (years, continuous), pre-pregnancy BMI (kg/m<sup>2</sup>, continuous), parity (0,1,2, 3 or more), highest level of education (Less than high school, High school diploma or GED or equivalent, Some college or Associate degree, Bachelors degree, Masters degree or Advanced degree), marital status (not married vs. living as married), infant sex (male, female), gestational age at the time of ultrasound (continuous), total serum lipids (except for PFASs, ng/mL, continuous) and log transformed plasma cotinine level (log(x+1), continuous), with repeated measurements of fetal growth (random effect variable corresponding to the mother-child pair), and with a smooth function for the gestational age.

**eTable 13: Association between EDCs and longitudinal ulnar length using a generalized additive mixed model, NICHD Fetal Growth Studies – Singletons (n=2,284).**

| Chemicals       | Overall<br>(n=2,284) |     |     | Interaction by infant sex |     |     |            |     |     |                  | Interaction by maternal race/ethnicity group |     |     |        |     |     |           |     |     |        |     |     |                  |
|-----------------|----------------------|-----|-----|---------------------------|-----|-----|------------|-----|-----|------------------|----------------------------------------------|-----|-----|--------|-----|-----|-----------|-----|-----|--------|-----|-----|------------------|
|                 | beta                 | p   | FDR | Boys Only                 |     |     | Girls Only |     |     |                  | Whites                                       |     |     | Blacks |     |     | Hispanics |     |     | Asians |     |     | P <sub>int</sub> |
|                 |                      |     |     | beta                      | p   | FDR | beta       | p   | FDR | P <sub>int</sub> | beta                                         | p   | FDR | beta   | p   | FDR | beta      | p   | FDR | beta   | p   | FDR |                  |
| β-HCH           | 0.13                 | *** | *** | 0.21                      | *** | *** | 0.07       | *   |     | 0.011            | -0.02                                        |     |     | -0.10  |     |     | -0.69     | *** | *   | 0.16   | *** | *** | <0.001           |
| γ-HCH           | 0.05                 | .   |     | 0.06                      | *   | .   | -0.06      |     |     | 0.163            | -1.14                                        |     |     | -0.56  |     |     | -0.76     |     |     | 0.05   | .   |     | 0.615            |
| HCB             | -0.02                |     |     | -0.01                     |     |     | -0.30      |     |     | 0.143            | 0.53                                         |     |     | -0.45  |     |     | -0.63     | **  |     | -0.01  |     |     | 0.016            |
| Oxychlorodane   | -0.08                | .   |     | -1.60                     | *** | *** | -0.04      |     |     | <0.001           | -0.34                                        |     |     | -1.64  | *** | **  | -2.30     | *** | .   | -0.03  |     |     | <0.001           |
| Trans-chlordane | -0.01                |     |     | -0.01                     |     |     | 0.00       |     |     | 0.876            | 1.70                                         |     |     | 2.06   | *   |     | 0.31      |     |     | -0.01  |     |     | 0.063            |
| Trans-nonachlor | -0.08                | .   |     | -0.39                     | **  | *   | -0.03      |     |     | 0.011            | -0.03                                        |     |     | -0.17  |     |     | -0.47     | **  |     | -0.04  |     |     | 0.104            |
| p,p'-DDE        | -0.10                | *** | *   | -0.15                     | *** | **  | -0.06      |     |     | 0.072            | -0.66                                        | *** | *** | -0.09  |     |     | -0.10     | *   |     | -0.03  |     |     | <0.001           |
| o,p'-DDD        | -0.09                | *** | *   | -0.04                     |     |     | -0.12      | *** | *   | 0.108            | -0.16                                        |     |     | -0.12  | *   |     | 0.06      |     |     | -0.13  | *** | **  | 0.021            |
| p,p'-DDD        | 0.07                 | *   |     | 0.08                      | .   |     | 0.06       | .   |     | 0.784            | 0.06                                         |     |     | 0.06   |     |     | 0.11      |     |     | 0.07   | .   |     | 0.946            |
| p,p'-DDT        | 0.03                 |     |     | 0.02                      |     |     | 0.04       |     |     | 0.630            | 0.71                                         | .   |     | 0.10   |     |     | -0.02     |     |     | 0.10   | *   |     | 0.052            |
| Mirex           | -0.11                | *** | **  | -0.12                     | *** | **  | -0.10      | *   |     | 0.644            | 0.26                                         | **  | *   | -0.06  |     |     | -0.09     | **  |     | -0.28  | *** | *** | <0.001           |
| PBB 153         | 0.00                 |     |     | 0.00                      |     |     | -0.01      |     |     | 0.680            | 0.00                                         |     |     | 0.00   |     |     | 0.06      |     |     | -0.01  |     |     | 0.834            |
| PBDE 28         | -0.02                |     |     | 0.00                      |     |     | -0.16      | *   |     | 0.021            | -0.33                                        | **  | .   | -0.03  |     |     | 0.04      |     |     | -0.04  |     |     | 0.030            |
| PBDE 47         | -0.06                | *   |     | -0.01                     |     |     | -0.11      | **  | .   | 0.047            | -0.13                                        | **  | .   | 0.05   |     |     | -0.08     |     |     | -0.08  |     |     | 0.077            |
| PBDE 85         | -0.03                |     |     | -0.01                     |     |     | -0.07      |     |     | 0.210            | -0.06                                        |     |     | 0.25   | *** | *** | -0.03     |     |     | -0.35  | *** | *** | <0.001           |
| PBDE 99         | 0.02                 |     |     | 0.05                      |     |     | -0.01      |     |     | 0.250            | -0.08                                        |     |     | 0.09   | *   |     | -0.03     |     |     | 0.06   |     |     | 0.056            |
| PBDE 100        | -0.08                | *** | *   | -0.06                     | .   |     | -0.12      | *** | *   | 0.166            | -0.17                                        | *** | **  | -0.06  |     |     | -0.05     |     |     | -0.08  |     |     | 0.232            |
| PBDE 153        | -0.07                | *   |     | -0.06                     | .   |     | -0.07      | .   |     | 0.827            | -0.08                                        | *   |     | -0.01  |     |     | -0.11     |     |     | -0.09  |     |     | 0.655            |
| PBDE 154        | -0.01                |     |     | 0.03                      |     |     | -0.05      |     |     | 0.111            | 0.00                                         |     |     | 0.07   |     |     | 0.02      |     |     | -0.19  | **  | *   | 0.011            |
| PBDE 183        | 0.06                 | *   |     | 0.05                      | .   |     | 0.07       | .   |     | 0.718            | 0.07                                         |     |     | -0.01  |     |     | 0.07      |     |     | 0.07   |     |     | 0.336            |
| PBDE 209        | -0.09                | *** | *   | -0.09                     | **  | *   | -0.08      | *   |     | 0.954            | -0.09                                        |     |     | -0.08  |     |     | -0.09     |     |     | -0.09  |     |     | 0.002            |
| PCB 5/8         | 0.03                 |     |     | 0.04                      |     |     | 0.03       |     |     | 0.764            | 0.32                                         |     |     | 0.31   | *** | **  | -0.01     |     |     | -0.04  |     |     | 0.003            |
| PCB 18/17       | 0.06                 | **  |     | 0.06                      | **  | *   | 0.69       | *   |     | 0.038            | 0.06                                         | **  | .   | 2.21   | *** | *** | -0.45     |     |     | -0.29  |     |     | <0.001           |
| PCB 22          | 0.09                 | **  | *   | 0.06                      | .   |     | 0.15       | *** | *   | 0.096            | 0.27                                         | **  | .   | 0.47   | *** | *** | -0.01     |     |     | 0.07   |     |     | <0.001           |
| PCB 31/28       | 0.11                 | *** | **  | 0.10                      | **  | *   | 0.14       | **  | .   | 0.427            | 0.25                                         | **  | .   | 0.45   | *** | *** | -0.01     |     |     | 0.19   | **  | *   | <0.001           |
| PCB 33/20       | 0.07                 | **  |     | 0.04                      |     |     | 0.14       | **  | .   | 0.108            | 0.27                                         | **  | .   | 0.49   | *** | *** | -0.01     |     |     | -0.01  |     |     | <0.001           |
| PCB 37          | 0.11                 | *** | **  | 0.09                      | *   | *   | 0.15       | *** | *   | 0.239            | 0.25                                         | **  | *   | 0.49   | *** | *** | 0.01      |     |     | 0.07   |     |     | <0.001           |
| PCB 41/64       | 0.11                 | *** | *   | 0.21                      | *** | **  | 0.06       |     |     | 0.028            | 0.43                                         | *** | *** | 0.25   | *** | *** | -0.05     |     |     | -0.02  |     |     | <0.001           |
| PCB 44          | 0.09                 | **  |     | 0.19                      | *** | **  | 0.05       |     |     | 0.035            | 0.35                                         | *** | *   | 0.24   | *** | *** | -0.04     |     |     | -0.03  |     |     | <0.001           |
| PCB 47/48/75    | 0.09                 | **  | .   | 0.22                      | *** | **  | 0.04       |     |     | 0.006            | 0.41                                         | *** | **  | 0.21   | *** | **  | -0.06     |     |     | -0.02  |     |     | <0.001           |
| PCB 49/43       | 0.09                 | **  | .   | 0.16                      | **  | *   | 0.06       |     |     | 0.121            | 0.34                                         | *** | **  | 0.24   | *** | *** | -0.03     |     |     | -0.06  |     |     | <0.001           |
| PCB 52/73       | 0.04                 |     |     | 0.19                      | *   | .   | 0.01       |     |     | 0.046            | 0.45                                         | *   |     | 0.28   | **  | *   | -0.02     |     |     | -0.04  |     |     | 0.002            |
| PCB 66/80       | 0.13                 | *** | **  | 0.21                      | *** | *** | 0.05       |     |     | 0.004            | 0.38                                         | *** | *** | 0.24   | *** | *** | 0.01      |     |     | 0.03   |     |     | <0.001           |
| PCB 70/76       | 0.09                 | **  | .   | 0.14                      | **  | *   | 0.06       |     |     | 0.195            | 0.28                                         | **  | .   | 0.24   | *** | *** | -0.02     |     |     | -0.03  |     |     | <0.001           |
| PCB 74/61       | 0.06                 | *   |     | 0.08                      | *   | .   | 0.03       |     |     | 0.353            | 0.14                                         | *   |     | 0.20   | **  | .   | 0.01      |     |     | -0.02  |     |     | 0.024            |
| PCB 90/101/89   | 0.07                 | .   |     | 0.25                      | *** | **  | 0.02       |     |     | 0.007            | 0.47                                         | *** | *   | 0.29   | *** | **  | 0.01      |     |     | -0.05  |     |     | <0.001           |
| PCB 93/95       | 0.03                 |     |     | 0.60                      | **  | **  | 0.00       |     |     | 0.002            | 1.28                                         | *** | **  | 0.91   | *** | *** | -0.12     |     |     | -0.03  |     |     | <0.001           |
| PCB 99          | 0.04                 |     |     | 0.18                      | *   | *   | 0.01       |     |     | 0.034            | 0.41                                         | *** | *** | 0.21   | *   |     | 0.23      | .   |     | -0.13  | *   |     | <0.001           |
| PCB 85/120      | 0.10                 | **  | *   | 0.19                      | *** | **  | 0.06       |     |     | 0.033            | 0.24                                         | **  | *   | 0.14   | **  |     | 0.20      | *   |     | -0.03  |     |     | 0.013            |
| PCB 110         | 0.09                 | *   |     | 0.25                      | *** | **  | 0.03       |     |     | 0.004            | 0.40                                         | *** | *   | 0.25   | *** | **  | 0.05      |     |     | -0.03  |     |     | <0.001           |



| Chemicals   | Overall<br>(n=2,284) |     |     | Interaction by infant sex |     |     |            |     |     |                  | Interaction by maternal race/ethnicity group |     |     |        |     |     |           |   |     |        |     |     |                  |
|-------------|----------------------|-----|-----|---------------------------|-----|-----|------------|-----|-----|------------------|----------------------------------------------|-----|-----|--------|-----|-----|-----------|---|-----|--------|-----|-----|------------------|
|             | beta                 | p   | FDR | Boys Only                 |     |     | Girls Only |     |     |                  | Whites                                       |     |     | Blacks |     |     | Hispanics |   |     | Asians |     |     | P <sub>int</sub> |
|             |                      |     |     | beta                      | p   | FDR | beta       | p   | FDR | P <sub>int</sub> | beta                                         | p   | FDR | beta   | p   | FDR | beta      | p | FDR | beta   | p   | FDR |                  |
| PCB 118/106 | 0.05                 |     |     | 0.11                      | *   | .   | 0.02       |     |     | 0.132            | 0.22                                         | *** | *** | 0.10   |     |     | 0.05      |   |     | -0.17  | **  | *   | <0.001           |
| PCB 105/127 | 0.06                 | .   |     | 0.14                      | **  | *   | 0.01       |     |     | 0.040            | 0.24                                         | *** | *** | 0.08   |     |     | 0.08      |   |     | -0.17  | **  | *   | <0.001           |
| PCB 114/122 | 0.03                 |     |     | 0.09                      | *   |     | 0.00       |     |     | 0.101            | 0.09                                         | *   |     | -0.02  |     |     | 0.04      |   |     | -0.11  |     |     | 0.087            |
| PCB 128     | 0.02                 |     |     | 0.06                      |     |     | -0.02      |     |     | 0.159            | 0.18                                         | *** | **  | 0.06   |     |     | -0.01     |   |     | -0.20  | *** | **  | <0.001           |
| PCB 137     | 0.02                 |     |     | 0.05                      |     |     | 0.00       |     |     | 0.333            | 0.13                                         | **  | .   | 0.11   |     |     | 0.00      |   |     | -0.15  | **  | .   | <0.001           |
| PCB 138/158 | 0.01                 |     |     | 0.02                      |     |     | 0.01       |     |     | 0.867            | 0.20                                         | *** | **  | 0.09   |     |     | 0.09      |   |     | -0.25  | *** | *** | <0.001           |
| PCB 146/161 | -0.04                |     |     | -0.01                     |     |     | -0.06      |     |     | 0.406            | 0.28                                         | *** | **  | 0.15   | *   |     | 0.01      |   |     | -0.27  | *** | *** | <0.001           |
| PCB 153     | 0.01                 |     |     | 0.04                      |     |     | -0.01      |     |     | 0.376            | 0.19                                         | *** | **  | 0.17   | *   |     | 0.11      |   |     | -0.26  | *** | *** | <0.001           |
| PCB 156     | 0.02                 |     |     | 0.03                      |     |     | 0.00       |     |     | 0.642            | 0.08                                         | *   |     | -0.02  |     |     | 0.04      |   |     | -0.21  | **  | *   | 0.002            |
| PCB 157     | 0.00                 |     |     | 0.03                      |     |     | -0.04      |     |     | 0.188            | 0.08                                         | *   |     | -0.10  |     |     | 0.02      |   |     | -0.15  | **  | .   | 0.005            |
| PCB 167     | -0.05                |     |     | -0.02                     |     |     | -0.07      |     |     | 0.461            | 0.15                                         | **  | *   | -0.06  |     |     | -0.10     |   |     | -0.22  | *** | *** | <0.001           |
| PCB 170     | 0.01                 |     |     | 0.02                      |     |     | -0.02      |     |     | 0.466            | 0.08                                         | *   | .   | 0.14   |     |     | -0.07     |   |     | -0.29  | *** | *** | <0.001           |
| PCB 172/192 | -0.01                |     |     | 0.02                      |     |     | -0.06      |     |     | 0.124            | 0.11                                         | **  | .   | 0.33   | *** | **  | -0.19     | * |     | -0.23  | *** | *** | <0.001           |
| PCB 177     | 0.02                 |     |     | 0.04                      |     |     | -0.01      |     |     | 0.379            | 0.21                                         | *** | *** | 0.30   | **  | *   | 0.01      |   |     | -0.26  | *** | *** | <0.001           |
| PCB 180     | -0.01                |     |     | 0.01                      |     |     | -0.04      |     |     | 0.350            | 0.09                                         | **  | .   | 0.20   | .   |     | -0.08     |   |     | -0.29  | *** | *** | <0.001           |
| PCB 182/187 | 0.01                 |     |     | 0.08                      |     |     | -0.02      |     |     | 0.153            | 0.30                                         | *** | **  | 0.51   | *** | *** | 0.12      |   |     | -0.19  | *** | **  | <0.001           |
| PCB 183     | 0.05                 |     |     | 0.08                      | .   |     | 0.02       |     |     | 0.302            | 0.19                                         | *** | **  | 0.45   | *** | *** | -0.05     |   |     | -0.22  | *** | *** | <0.001           |
| PCB 194     | 0.01                 |     |     | 0.03                      |     |     | -0.07      |     |     | 0.095            | 0.07                                         | *   |     | 0.18   | .   |     | -0.07     |   |     | -0.31  | *** | *** | <0.001           |
| PCB 195     | 0.03                 |     |     | 0.05                      |     |     | -0.02      |     |     | 0.205            | 0.12                                         | *** | **  | 0.21   | .   |     | -0.07     |   |     | -0.26  | *** | *** | <0.001           |
| PCB 196/203 | -0.02                |     |     | 0.02                      |     |     | -0.12      | *   |     | 0.013            | 0.07                                         | *   |     | 0.08   |     |     | -0.10     |   |     | -0.32  | *** | *** | <0.001           |
| PCB 199     | -0.03                |     |     | 0.01                      |     |     | -0.11      | *   |     | 0.036            | 0.09                                         | *   |     | 0.06   |     |     | -0.09     |   |     | -0.30  | *** | *** | <0.001           |
| PCB 202     | -0.06                |     |     | 0.02                      |     |     | -0.10      | *   |     | 0.081            | 0.22                                         | **  | *   | 0.23   | **  |     | -0.02     |   |     | -0.25  | *** | *** | <0.001           |
| PCB 206     | -0.04                |     |     | -0.01                     |     |     | -0.09      | .   |     | 0.243            | 0.11                                         | *   |     | 0.17   | *   |     | 0.02      |   |     | -0.38  | *** | *** | <0.001           |
| PCB 208     | -0.11                | **  | .   | -0.09                     | .   |     | -0.15      | **  |     | 0.436            | 0.04                                         |     |     | 0.05   |     |     | 0.06      |   |     | -0.31  | *** | *** | <0.001           |
| PCB 209     | -0.07                | .   |     | -0.03                     |     |     | -0.10      | *   |     | 0.378            | -0.01                                        |     |     | -0.01  |     |     | 0.18      | . |     | -0.26  | *** | *** | <0.001           |
| NMeFOSAA    | 0.04                 |     |     | 0.13                      | *** | **  | -0.05      |     |     | <0.001           | 0.02                                         |     |     | 0.10   | *   |     | -0.10     | . |     | 0.12   | *   |     | 0.013            |
| PFDA        | 0.08                 | **  | .   | 0.05                      |     |     | 0.11       | **  |     | 0.302            | 0.38                                         | *** | *** | 0.17   | *** | **  | -0.07     |   |     | -0.28  | *** | *** | <0.001           |
| PFDoDA      | 0.00                 |     |     | 0.04                      |     |     | 0.00       |     |     | 0.452            | 0.32                                         | *** | *** | 0.19   | *** | **  | -0.05     |   |     | -0.39  | *** | *** | <0.001           |
| PFDS        | -0.05                | .   |     | -0.03                     |     |     | -0.07      |     |     | 0.423            | 0.14                                         | .   |     | 0.03   |     |     | -0.07     |   |     | -0.16  | *** | **  | <0.001           |
| PFHpA       | 0.15                 | *** | *** | 0.08                      | *   | .   | 0.21       | *** | *** | 0.006            | 0.21                                         | *** | *** | 0.36   | *** | *** | -0.03     |   |     | 0.14   | *   |     | <0.001           |
| PFHxS       | 0.06                 | *   |     | 0.05                      |     |     | 0.07       | .   |     | 0.673            | 0.13                                         | **  | *   | 0.02   |     |     | -0.12     | . |     | 0.20   | *   |     | 0.002            |
| PFNA        | 0.05                 | *   |     | -0.02                     |     |     | 0.12       | *** | *   | 0.005            | 0.31                                         | *** | *** | 0.09   | *   |     | 0.00      |   |     | -0.24  | *** | *** | <0.001           |
| PFOA        | 0.10                 | *** | *   | 0.05                      |     |     | 0.14       | *** | *   | 0.058            | 0.15                                         | **  | *   | 0.22   | *** | **  | -0.10     | . |     | 0.11   | .   |     | <0.001           |
| PFOS        | 0.02                 |     |     | 0.02                      |     |     | 0.00       |     |     | 0.595            | 0.31                                         | *** | *** | 0.08   |     |     | -0.12     | * |     | -0.29  | *** | *** | <0.001           |
| PFOSA       | -0.12                | *** | *** | -0.08                     | *   | *   | -0.18      | *** | **  | 0.051            | -0.09                                        | .   |     | -0.18  | *** | **  | 0.01      |   |     | -0.16  | *** | **  | 0.044            |
| PFUnDA      | 0.01                 |     |     | 0.03                      |     |     | 0.01       |     |     | 0.641            | 0.38                                         | *** | *** | 0.12   | **  |     | 0.08      |   |     | -0.26  | *** | *** | <0.001           |

P-values: \*\*\*<0.001 ; \*\*0.001-0.01 ; \*<0.01-0.05 ; . 0.05-0.1

FDR: p-values after false discovery rate correction (\*\*\*<0.001 ; \*\*0.001-0.01 ; \*<0.01-0.05 ; . 0.05-0.1)

P<sub>int</sub>: p-values of interaction

Adjusted for maternal race/ethnicity (White, Black, Hispanic, Asian), maternal age (years, continuous), pre-pregnancy BMI (kg/m<sup>2</sup>, continuous), parity (0,1,2, 3 or more), highest level of education (Less than high school, High school diploma or GED or equivalent, Some college or Associate degree, Bachelors degree, Masters degree or Advanced degree), marital status (not married vs. living as married), infant sex (male, female), gestational age at the time of ultrasound (continuous), total serum lipids (except for PFASs, ng/mL, continuous) and log transformed plasma cotinine level (log(x+1), continuous), with repeated measurements of fetal growth (random effect variable corresponding to the mother-child pair), and with a smooth function for the gestational age.

**eTable 14: Association between EDCs and longitudinal femur length using a generalized additive mixed model, NICHD Fetal Growth Studies – Singletons (n=2,284).**

| Chemicals       | Overall<br>(n=2,284) |     |     | Interaction by infant sex |     |     |            |     |     |                  | Interaction by maternal race/ethnicity group |     |     |        |     |     |           |     |     |        |     |     |                  |
|-----------------|----------------------|-----|-----|---------------------------|-----|-----|------------|-----|-----|------------------|----------------------------------------------|-----|-----|--------|-----|-----|-----------|-----|-----|--------|-----|-----|------------------|
|                 | beta                 | p   | FDR | Boys Only                 |     |     | Girls Only |     |     |                  | Whites                                       |     |     | Blacks |     |     | Hispanics |     |     | Asians |     |     | P <sub>int</sub> |
|                 |                      |     |     | beta                      | p   | FDR | beta       | p   | FDR | P <sub>int</sub> | beta                                         | p   | FDR | beta   | p   | FDR | beta      | p   | FDR | beta   | p   | FDR |                  |
| β-HCH           | 0.16                 | *** | *** | 0.18                      | *** | *** | 0.14       | *** | **  | 0.445            | 0.40                                         |     |     | 0.17   |     |     | -0.39     | *   |     | 0.17   | *** | *** | 0.006            |
| γ-HCH           | 0.06                 | *   |     | 0.06                      | *   | .   | 0.00       |     |     | 0.454            | 1.39                                         |     |     | 0.84   | .   |     | -0.94     |     |     | 0.05   | *   |     | 0.265            |
| HCB             | -0.03                |     |     | -0.03                     |     |     | -0.05      |     |     | 0.889            | -0.40                                        |     |     | -0.55  | .   |     | -0.14     |     |     | -0.02  |     |     | 0.257            |
| Oxychlorodane   | 0.01                 |     |     | -0.98                     | **  | *   | 0.02       |     |     | <0.001           | -0.95                                        | *   |     | 0.02   |     |     | -1.67     | **  |     | 0.02   |     |     | 0.003            |
| Trans-chlordane | -0.01                |     |     | -0.03                     |     |     | 0.04       |     |     | 0.193            | 0.03                                         |     |     | 1.43   | .   |     | 1.68      |     |     | -0.01  |     |     | 0.156            |
| Trans-nonachlor | 0.00                 |     |     | -0.31                     | **  | *   | 0.03       |     |     | 0.005            | -0.19                                        |     |     | 0.14   |     |     | -0.23     |     |     | 0.02   |     |     | 0.212            |
| p,p'-DDE        | -0.09                | *** | *   | -0.16                     | *** | *** | -0.03      |     |     | 0.006            | -0.83                                        | *** | *** | -0.32  | *** | *   | -0.05     |     |     | -0.01  |     |     | <0.001           |
| o,p'-DDD        | -0.04                |     |     | 0.01                      |     |     | -0.07      | *   |     | 0.070            | 0.03                                         |     |     | -0.05  |     |     | 0.09      | .   |     | -0.09  | **  | .   | 0.015            |
| p,p'-DDD        | 0.05                 | *   |     | 0.03                      |     |     | 0.07       | .   |     | 0.441            | 0.03                                         |     |     | 0.00   |     |     | 0.07      |     |     | 0.06   | .   |     | 0.867            |
| p,p'-DDT        | 0.05                 | *   |     | 0.02                      |     |     | 0.09       | **  |     | 0.099            | 0.57                                         | .   |     | -0.13  |     |     | 0.04      |     |     | 0.08   | .   |     | 0.325            |
| Mirex           | -0.09                | *** | **  | -0.13                     | *** | *** | -0.05      |     |     | 0.056            | 0.24                                         | **  | .   | -0.08  |     |     | -0.10     | *** |     | -0.17  | *** | **  | <0.001           |
| PBB 153         | 0.01                 |     |     | 0.01                      |     |     | 0.00       |     |     | 0.893            | -0.01                                        |     |     | 0.00   |     |     | 0.01      |     |     | 0.01   |     |     | 0.973            |
| PBDE 28         | -0.06                | **  | .   | -0.04                     | .   |     | -0.19      | **  | *   | 0.016            | -0.62                                        | *** | *** | -0.07  | *   |     | -0.01     |     |     | -0.01  |     |     | <0.001           |
| PBDE 47         | -0.08                | *** | *   | 0.00                      |     |     | -0.15      | *** | *** | <0.001           | -0.20                                        | *** | *** | 0.01   |     |     | -0.10     | *   |     | -0.01  |     |     | 0.008            |
| PBDE 85         | -0.02                |     |     | -0.01                     |     |     | -0.06      |     |     | 0.264            | -0.06                                        |     |     | 0.19   | *** | *   | -0.05     |     |     | -0.21  | **  | .   | <0.001           |
| PBDE 99         | 0.02                 |     |     | 0.04                      |     |     | -0.02      |     |     | 0.266            | -0.05                                        |     |     | 0.07   | .   |     | -0.09     | .   |     | 0.13   | *   |     | 0.011            |
| PBDE 100        | -0.10                | *** | *** | -0.05                     | .   |     | -0.15      | *** | *** | 0.018            | -0.19                                        | *** | **  | -0.10  | *   |     | -0.06     |     |     | 0.00   |     |     | 0.066            |
| PBDE 153        | -0.05                | *   |     | -0.02                     |     |     | -0.08      | *   |     | 0.178            | -0.08                                        | *   |     | -0.03  |     |     | -0.03     |     |     | 0.06   |     |     | 0.405            |
| PBDE 154        | -0.03                |     |     | 0.02                      |     |     | -0.09      | **  |     | 0.021            | -0.11                                        | **  | .   | 0.00   |     |     | 0.05      |     |     | -0.09  |     |     | 0.021            |
| PBDE 183        | 0.05                 | *   |     | 0.04                      |     |     | 0.06       |     |     | 0.765            | 0.04                                         |     |     | 0.22   |     |     | 0.04      |     |     | 0.04   |     |     | 0.035            |
| PBDE 209        | -0.07                | *** | *   | -0.02                     |     |     | -0.14      | *** | **  | 0.010            | -0.02                                        |     |     | -0.14  |     |     | -0.02     |     |     | -0.02  |     |     | <0.001           |
| PCB 5/8         | 0.04                 |     |     | 0.08                      | .   |     | 0.02       |     |     | 0.301            | 0.22                                         |     |     | 0.13   | .   |     | 0.04      |     |     | 0.01   |     |     | 0.514            |
| PCB 18/17       | 0.07                 | **  | *   | 0.06                      | **  | *   | 0.93       | *** | *   | <0.001           | 0.06                                         | **  | *   | 1.92   | *** | *** | 0.08      |     |     | -0.21  |     |     | <0.001           |
| PCB 22          | 0.08                 | *** | *   | 0.07                      | *   | *   | 0.11       | **  |     | 0.535            | 0.18                                         | *   |     | 0.29   | *** | *** | 0.04      |     |     | 0.06   |     |     | 0.002            |
| PCB 31/28       | 0.10                 | *** | **  | 0.10                      | *** | **  | 0.11       | **  |     | 0.914            | 0.10                                         |     |     | 0.27   | *** | **  | 0.04      |     |     | 0.17   | **  | *   | 0.005            |
| PCB 33/20       | 0.07                 | **  | .   | 0.07                      | *   | .   | 0.10       | *   |     | 0.589            | 0.17                                         | .   |     | 0.30   | *** | *** | 0.04      |     |     | 0.00   |     |     | <0.001           |
| PCB 37          | 0.09                 | *** | **  | 0.09                      | **  | *   | 0.10       | **  |     | 0.948            | 0.16                                         | .   |     | 0.32   | *** | *** | 0.04      |     |     | 0.05   |     |     | <0.001           |
| PCB 41/64       | 0.09                 | *** | *   | 0.18                      | *** | **  | 0.06       | .   |     | 0.055            | 0.31                                         | **  | *   | 0.17   | *** | *   | 0.03      |     |     | 0.03   |     |     | 0.022            |
| PCB 44          | 0.07                 | *   |     | 0.14                      | **  | *   | 0.04       |     |     | 0.094            | 0.24                                         | *   |     | 0.15   | **  | .   | -0.01     |     |     | 0.02   |     |     | 0.054            |
| PCB 47/48/75    | 0.07                 | *   |     | 0.15                      | **  | *   | 0.04       |     |     | 0.070            | 0.26                                         | *   |     | 0.13   | **  | .   | 0.01      |     |     | 0.02   |     |     | 0.070            |
| PCB 49/43       | 0.07                 | *   |     | 0.13                      | **  | *   | 0.04       |     |     | 0.132            | 0.23                                         | *   |     | 0.14   | **  | .   | 0.01      |     |     | 0.01   |     |     | 0.054            |
| PCB 52/73       | 0.04                 |     |     | 0.14                      | .   |     | 0.02       |     |     | 0.161            | 0.30                                         |     |     | 0.11   |     |     | 0.04      |     |     | 0.01   |     |     | 0.448            |
| PCB 66/80       | 0.09                 | *** | *   | 0.16                      | *** | *** | 0.04       |     |     | 0.015            | 0.19                                         | *   |     | 0.15   | **  | *   | 0.07      |     |     | 0.04   |     |     | 0.241            |
| PCB 70/76       | 0.08                 | **  | .   | 0.13                      | **  | *   | 0.04       |     |     | 0.109            | 0.19                                         | *   |     | 0.15   | **  | .   | 0.03      |     |     | 0.03   |     |     | 0.169            |
| PCB 74/61       | 0.03                 |     |     | 0.03                      |     |     | 0.03       |     |     | 0.918            | 0.03                                         |     |     | 0.08   |     |     | 0.07      |     |     | 0.00   |     |     | 0.773            |
| PCB 90/101/89   | 0.05                 |     |     | 0.17                      | *   | *   | 0.02       |     |     | 0.060            | 0.34                                         | **  |     | 0.15   | *   |     | -0.02     |     |     | 0.00   |     |     | 0.039            |
| PCB 93/95       | 0.04                 |     |     | 0.42                      | *   | *   | 0.02       |     |     | 0.026            | 0.99                                         | **  | .   | 0.51   | **  |     | -0.11     |     |     | 0.02   |     |     | 0.003            |
| PCB 99          | 0.00                 |     |     | 0.03                      |     |     | -0.01      |     |     | 0.680            | 0.23                                         | **  |     | 0.00   |     |     | 0.16      |     |     | -0.06  |     |     | 0.017            |
| PCB 85/120      | 0.05                 | .   |     | 0.12                      | **  | *   | 0.01       |     |     | 0.056            | 0.17                                         | *   |     | 0.03   |     |     | 0.07      |     |     | 0.02   |     |     | 0.464            |
| PCB 110         | 0.06                 | *   |     | 0.17                      | **  | *   | 0.02       |     |     | 0.033            | 0.32                                         | **  | .   | 0.11   | .   |     | 0.05      |     |     | 0.01   |     |     | 0.094            |



| Chemicals   | Overall<br>(n=2,284) |     |     | Interaction by infant sex |     |     |            |     |     |                  | Interaction by maternal race/ethnicity group |     |     |        |     |     |           |   |     |        |     |     |                  |
|-------------|----------------------|-----|-----|---------------------------|-----|-----|------------|-----|-----|------------------|----------------------------------------------|-----|-----|--------|-----|-----|-----------|---|-----|--------|-----|-----|------------------|
|             | beta                 | p   | FDR | Boys Only                 |     |     | Girls Only |     |     |                  | Whites                                       |     |     | Blacks |     |     | Hispanics |   |     | Asians |     |     | P <sub>int</sub> |
|             |                      |     |     | beta                      | p   | FDR | beta       | p   | FDR | P <sub>int</sub> | beta                                         | p   | FDR | beta   | p   | FDR | beta      | p | FDR | beta   | p   | FDR |                  |
| PCB 118/106 | -0.01                |     |     | 0.01                      |     |     | -0.02      |     |     | 0.718            | 0.12                                         | **  |     | -0.06  |     |     | 0.01      |   |     | -0.11  | *   |     | 0.004            |
| PCB 105/127 | -0.01                |     |     | 0.01                      |     |     | -0.03      |     |     | 0.555            | 0.12                                         | *   |     | -0.08  |     |     | 0.04      |   |     | -0.11  | *   |     | 0.004            |
| PCB 114/122 | 0.03                 |     |     | 0.10                      | *   | *   | -0.01      |     |     | 0.038            | 0.08                                         | *   |     | -0.03  |     |     | 0.13      |   |     | -0.05  |     |     | 0.098            |
| PCB 128     | -0.07                | **  | *   | -0.03                     |     |     | -0.13      | *** | *   | 0.045            | 0.07                                         |     |     | -0.08  |     |     | -0.09     |   |     | -0.24  | *** | *** | <0.001           |
| PCB 137     | -0.01                |     |     | 0.02                      |     |     | -0.03      |     |     | 0.417            | 0.05                                         |     |     | 0.01   |     |     | 0.04      |   |     | -0.08  | .   |     | 0.214            |
| PCB 138/158 | -0.06                | *   |     | -0.07                     | .   |     | -0.06      |     |     | 0.642            | 0.08                                         |     |     | -0.09  |     |     | 0.08      |   |     | -0.21  | *** | *** | <0.001           |
| PCB 146/161 | -0.07                | *   |     | -0.06                     |     |     | -0.09      | *   |     | 0.682            | 0.17                                         | *   |     | -0.04  |     |     | 0.08      |   |     | -0.22  | *** | *** | <0.001           |
| PCB 153     | -0.05                | .   |     | -0.06                     |     |     | -0.05      |     |     | 0.811            | 0.07                                         |     |     | -0.03  |     |     | 0.14      |   |     | -0.20  | *** | *** | <0.001           |
| PCB 156     | 0.01                 |     |     | 0.01                      |     |     | 0.00       |     |     | 0.990            | 0.05                                         |     |     | -0.15  | *   |     | 0.14      | * |     | -0.15  | *   |     | <0.001           |
| PCB 157     | -0.01                |     |     | 0.02                      |     |     | -0.07      | .   |     | 0.099            | 0.07                                         | .   |     | -0.20  | **  | .   | 0.05      |   |     | -0.15  | **  | .   | <0.001           |
| PCB 167     | -0.12                | *** | *** | -0.09                     | *   | *   | -0.15      | *** | **  | 0.309            | 0.04                                         |     |     | -0.24  | **  | .   | -0.17     | * |     | -0.23  | *** | *** | <0.001           |
| PCB 170     | -0.04                |     |     | -0.03                     |     |     | -0.07      |     |     | 0.600            | 0.01                                         |     |     | -0.07  |     |     | -0.02     |   |     | -0.20  | *** | **  | 0.012            |
| PCB 172/192 | -0.04                |     |     | -0.02                     |     |     | -0.09      | *   |     | 0.235            | 0.02                                         |     |     | 0.14   | .   |     | -0.14     | . |     | -0.14  | **  | *   | 0.004            |
| PCB 177     | -0.04                |     |     | -0.04                     |     |     | -0.04      |     |     | 0.819            | 0.09                                         | .   |     | 0.05   |     |     | 0.02      |   |     | -0.17  | *** | *** | <0.001           |
| PCB 180     | -0.05                | .   |     | -0.04                     |     |     | -0.07      |     |     | 0.726            | 0.01                                         |     |     | 0.04   |     |     | -0.01     |   |     | -0.20  | *** | *** | 0.003            |
| PCB 182/187 | -0.01                |     |     | -0.02                     |     |     | -0.01      |     |     | 0.867            | 0.14                                         | *   |     | 0.28   | *   |     | 0.18      |   |     | -0.10  | **  |     | <0.001           |
| PCB 183     | -0.01                |     |     | -0.01                     |     |     | -0.01      |     |     | 0.850            | 0.07                                         |     |     | 0.24   | *   |     | -0.03     |   |     | -0.12  | **  | .   | <0.001           |
| PCB 194     | -0.02                |     |     | -0.01                     |     |     | -0.05      |     |     | 0.649            | 0.01                                         |     |     | 0.15   |     |     | 0.03      |   |     | -0.19  | *** | **  | 0.003            |
| PCB 195     | -0.01                |     |     | -0.01                     |     |     | 0.00       |     |     | 0.782            | 0.04                                         |     |     | 0.16   |     |     | 0.05      |   |     | -0.15  | **  | *   | 0.005            |
| PCB 196/203 | -0.05                | .   |     | -0.02                     |     |     | -0.10      | *   |     | 0.183            | 0.00                                         |     |     | 0.02   |     |     | 0.14      |   |     | -0.21  | *** | *** | 0.002            |
| PCB 199     | -0.05                | .   |     | -0.02                     |     |     | -0.09      | *   |     | 0.233            | 0.02                                         |     |     | 0.04   |     |     | 0.04      |   |     | -0.20  | *** | *** | <0.001           |
| PCB 202     | -0.06                | .   |     | -0.04                     |     |     | -0.07      | .   |     | 0.828            | 0.09                                         |     |     | 0.11   |     |     | 0.02      |   |     | -0.14  | *** | **  | 0.005            |
| PCB 206     | -0.08                | *   |     | -0.08                     | *   |     | -0.07      |     |     | 0.724            | 0.00                                         |     |     | 0.16   | *   |     | 0.15      |   |     | -0.32  | *** | *** | <0.001           |
| PCB 208     | -0.15                | *** | *** | -0.14                     | **  | *   | -0.18      | *** | *   | 0.684            | -0.07                                        |     |     | 0.04   |     |     | 0.01      |   |     | -0.31  | *** | *** | <0.001           |
| PCB 209     | -0.11                | **  | *   | -0.06                     |     |     | -0.15      | **  | *   | 0.251            | -0.09                                        |     |     | -0.13  |     |     | 0.21      | * |     | -0.26  | *** | *** | <0.001           |
| NMeFOSAA    | 0.07                 | **  |     | 0.17                      | *** | *** | -0.03      |     |     | <0.001           | 0.00                                         |     |     | 0.19   | *** | **  | -0.12     | * |     | 0.18   | **  | *   | <0.001           |
| PFDA        | 0.06                 | *   |     | 0.02                      |     |     | 0.09       | **  |     | 0.198            | 0.35                                         | *** | *** | 0.14   | **  | *   | -0.04     |   |     | -0.31  | *** | *** | <0.001           |
| PFDoDA      | -0.01                |     |     | 0.00                      |     |     | -0.01      |     |     | 0.806            | 0.46                                         | *** | *** | 0.13   | **  | .   | -0.07     | * |     | -0.41  | *** | *** | <0.001           |
| PFDS        | -0.07                | **  |     | -0.03                     |     |     | -0.11      | **  | .   | 0.105            | 0.18                                         | *   |     | -0.05  |     |     | -0.04     |   |     | -0.15  | *** | **  | <0.001           |
| PFHpA       | 0.16                 | *** | *** | 0.13                      | *** | **  | 0.18       | *** | *** | 0.215            | 0.22                                         | *** | *** | 0.28   | *** | *** | 0.03      |   |     | 0.13   | *   |     | <0.001           |
| PFHxS       | 0.12                 | *** | *** | 0.09                      | **  | *   | 0.15       | *** | *** | 0.206            | 0.13                                         | *** | *   | 0.12   | **  | .   | 0.04      |   |     | 0.20   | **  | *   | 0.225            |
| PFNA        | 0.06                 | **  |     | 0.00                      |     |     | 0.12       | *** | *   | 0.014            | 0.36                                         | *** | *** | 0.10   | *   |     | 0.00      |   |     | -0.26  | *** | *** | <0.001           |
| PFOA        | 0.13                 | *** | *** | 0.07                      | .   |     | 0.19       | *** | *** | 0.006            | 0.18                                         | *** | *** | 0.18   | *** | *   | 0.04      |   |     | 0.10   | .   |     | 0.058            |
| PFOS        | 0.03                 |     |     | 0.07                      | .   |     | 0.00       |     |     | 0.140            | 0.25                                         | *** | *** | 0.16   | *** | *   | 0.01      |   |     | -0.33  | *** | *** | <0.001           |
| PFOSA       | -0.13                | *** | *** | -0.09                     | **  | *   | -0.21      | *** | *** | 0.009            | -0.18                                        | *** | *   | -0.18  | *** | **  | 0.01      |   |     | -0.15  | *** | **  | 0.012            |
| PFUnDA      | -0.02                |     |     | -0.02                     |     |     | -0.03      |     |     | 0.813            | 0.47                                         | *** | *** | 0.08   | .   |     | -0.04     |   |     | -0.31  | *** | *** | <0.001           |

P-values: \*\*\*<0.001 ; \*\*0.001-0.01 ; \*<0.01-0.05 ; . 0.05-0.1

FDR: p-values after false discovery rate correction (\*\*\*<0.001 ; \*\*0.001-0.01 ; \*<0.01-0.05 ; . 0.05-0.1)

P<sub>int</sub>: p-values of interaction

Adjusted for maternal race/ethnicity (White, Black, Hispanic, Asian), maternal age (years, continuous), pre-pregnancy BMI (kg/m<sup>2</sup>, continuous), parity (0,1,2, 3 or more), highest level of education (Less than high school, High school diploma or GED or equivalent, Some college or Associate degree, Bachelors degree, Masters degree or Advanced degree), marital status (not married vs. living as married), infant sex (male, female), gestational age at the time of ultrasound (continuous), total serum lipids (except for PFASs, ng/mL, continuous) and log transformed plasma cotinine level (log(x+1), continuous), with repeated measurements of fetal growth (random effect variable corresponding to the mother-child pair), and with a smooth function for the gestational age.

**eTable 15: Association between EDCs and longitudinal tibia length using a generalized additive mixed model, NICHD Fetal Growth Studies – Singletons (n=2,284).**

| Chemicals       | Overall<br>(n=2,284) |     |     | Interaction by infant sex |     |     |            |     |     |                  | Interaction by maternal race/ethnicity group |     |     |        |     |     |           |     |     |        |     |     |                  |
|-----------------|----------------------|-----|-----|---------------------------|-----|-----|------------|-----|-----|------------------|----------------------------------------------|-----|-----|--------|-----|-----|-----------|-----|-----|--------|-----|-----|------------------|
|                 | beta                 | p   | FDR | Boys Only                 |     |     | Girls Only |     |     | P <sub>int</sub> | Whites                                       |     |     | Blacks |     |     | Hispanics |     |     | Asians |     |     | P <sub>int</sub> |
|                 |                      |     |     | beta                      | p   | FDR | beta       | p   | FDR |                  | beta                                         | p   | FDR | beta   | p   | FDR | beta      | p   | FDR | beta   | p   | FDR |                  |
| β-HCH           | 0.16                 | *** | *** | 0.20                      | *** | *** | 0.13       | *** | *   | 0.187            | 0.45                                         |     |     | -0.35  |     |     | -0.53     | **  |     | 0.18   | *** | *** | <0.001           |
| γ-HCH           | 0.07                 | *   |     | 0.07                      | *   | .   | 0.09       |     |     | 0.792            | 0.64                                         |     |     | -0.35  |     |     | -1.70     | .   |     | 0.07   | **  | .   | 0.312            |
| HCB             | -0.06                | *   |     | -0.06                     | *   | .   | 0.04       |     |     | 0.768            | 1.15                                         | *   |     | -0.57  | .   |     | -0.43     | .   |     | -0.05  | *   |     | 0.022            |
| Oxychlorthane   | -0.03                |     |     | -1.60                     | *** | *** | 0.01       |     |     | <0.001           | -0.26                                        |     |     | -1.33  | **  | .   | -2.63     | *** | *   | 0.01   |     |     | <0.001           |
| Trans-chlordane | -0.05                | .   |     | -0.08                     | *   | .   | 0.06       |     |     | 0.107            | 0.19                                         |     |     | 0.33   |     |     | -0.09     |     |     | -0.05  |     |     | 0.971            |
| Trans-nonachlor | -0.05                |     |     | -0.40                     | **  | *   | 0.00       |     |     | 0.005            | -0.10                                        |     |     | -0.19  |     |     | -0.47     | **  |     | 0.01   |     |     | 0.059            |
| p,p'-DDE        | -0.11                | *** | **  | -0.17                     | *** | *** | -0.05      |     |     | 0.019            | -0.82                                        | *** | *** | -0.26  | *   |     | -0.09     | *   |     | -0.01  |     |     | <0.001           |
| o,p'-DDD        | -0.06                | *   |     | -0.04                     |     |     | -0.07      | *   |     | 0.523            | 0.05                                         |     |     | -0.06  |     |     | 0.02      |     |     | -0.11  | **  | *   | 0.251            |
| p,p'-DDD        | 0.02                 |     |     | 0.02                      |     |     | 0.03       |     |     | 0.921            | -0.10                                        |     |     | -0.07  |     |     | 0.11      |     |     | 0.04   |     |     | 0.296            |
| p,p'-DDT        | 0.04                 |     |     | 0.02                      |     |     | 0.06       |     |     | 0.421            | 0.36                                         |     |     | -0.18  |     |     | 0.00      |     |     | 0.12   | **  | .   | 0.090            |
| Mirex           | -0.10                | *** | **  | -0.14                     | *** | **  | -0.05      |     |     | 0.109            | 0.30                                         | **  | *   | -0.13  |     |     | -0.09     | **  |     | -0.25  | *** | *** | <0.001           |
| PBB 153         | -0.01                |     |     | -0.01                     |     |     | 0.01       |     |     | 0.637            | 0.04                                         |     |     | -0.01  |     |     | -0.04     |     |     | -0.03  |     |     | 0.581            |
| PBDE 28         | -0.05                | *   |     | -0.01                     |     |     | -0.29      | *** | *** | <0.001           | -0.57                                        | *** | *** | -0.06  | *   |     | -0.02     |     |     | 0.04   |     |     | <0.001           |
| PBDE 47         | -0.09                | *** | *   | 0.01                      |     |     | -0.18      | *** | *** | <0.001           | -0.21                                        | *** | *** | 0.02   |     |     | -0.10     | .   |     | -0.04  |     |     | 0.005            |
| PBDE 85         | -0.01                |     |     | 0.00                      |     |     | -0.04      |     |     | 0.386            | -0.09                                        | *   |     | 0.28   | *** | *** | -0.03     |     |     | -0.21  | **  | .   | <0.001           |
| PBDE 99         | 0.03                 |     |     | 0.07                      | *   | .   | -0.04      |     |     | 0.040            | -0.10                                        | .   |     | 0.10   | **  |     | -0.05     |     |     | 0.10   |     |     | 0.006            |
| PBDE 100        | -0.12                | *** | *** | -0.06                     | .   |     | -0.17      | *** | *** | 0.021            | -0.23                                        | *** | *** | -0.09  | *   |     | -0.08     | .   |     | -0.05  |     |     | 0.068            |
| PBDE 153        | -0.10                | *** | **  | -0.11                     | **  | *   | -0.08      | *   |     | 0.625            | -0.13                                        | *** | **  | -0.02  |     |     | -0.11     |     |     | -0.14  | .   |     | 0.329            |
| PBDE 154        | -0.03                |     |     | 0.03                      |     |     | -0.11      | **  | .   | 0.006            | -0.06                                        |     |     | 0.05   |     |     | 0.02      |     |     | -0.21  | **  | *   | 0.009            |
| PBDE 183        | 0.07                 | **  | .   | 0.06                      | .   |     | 0.09       | *   |     | 0.498            | 0.07                                         |     |     | 0.01   |     |     | 0.07      |     |     | 0.07   |     |     | 0.439            |
| PBDE 209        | -0.09                | *** | **  | -0.06                     | .   |     | -0.13      | *** | *   | 0.127            | -0.06                                        |     |     | -0.13  |     |     | -0.06     |     |     | -0.06  |     |     | <0.001           |
| PCB 5/8         | 0.06                 | .   |     | 0.05                      |     |     | 0.07       | .   |     | 0.750            | 0.59                                         | **  | .   | 0.25   | **  | .   | 0.02      |     |     | -0.01  |     |     | 0.006            |
| PCB 18/17       | 0.07                 | **  | *   | 0.07                      | **  | *   | 0.86       | **  | .   | 0.010            | 0.07                                         | **  | *   | 2.62   | *** | *** | -0.66     |     |     | -0.50  |     |     | <0.001           |
| PCB 22          | 0.11                 | *** | **  | 0.08                      | *   |     | 0.16       | *** | **  | 0.153            | 0.31                                         | **  | *   | 0.42   | *** | *** | 0.02      |     |     | 0.05   |     |     | <0.001           |
| PCB 31/28       | 0.15                 | *** | *** | 0.13                      | *** | **  | 0.17       | *** | **  | 0.494            | 0.28                                         | **  | *   | 0.41   | *** | *** | 0.03      |     |     | 0.20   | *** | **  | <0.001           |
| PCB 33/20       | 0.10                 | *** | *   | 0.06                      |     |     | 0.15       | *** | *   | 0.125            | 0.31                                         | **  | *   | 0.44   | *** | *** | 0.02      |     |     | -0.04  |     |     | <0.001           |
| PCB 37          | 0.13                 | *** | *** | 0.11                      | **  | *   | 0.16       | *** | **  | 0.490            | 0.29                                         | *** | *   | 0.45   | *** | *** | 0.03      |     |     | 0.05   |     |     | <0.001           |
| PCB 41/64       | 0.13                 | *** | **  | 0.18                      | **  | *   | 0.11       | **  |     | 0.321            | 0.48                                         | *** | *** | 0.21   | *** | **  | 0.00      |     |     | 0.03   |     |     | <0.001           |
| PCB 44          | 0.11                 | **  | *   | 0.15                      | **  | *   | 0.09       | *   |     | 0.353            | 0.41                                         | *** | **  | 0.19   | *** | *   | 0.00      |     |     | 0.02   |     |     | 0.002            |
| PCB 47/48/75    | 0.11                 | *** | *   | 0.15                      | **  | *   | 0.10       | *   |     | 0.390            | 0.43                                         | *** | **  | 0.17   | **  | *   | 0.01      |     |     | 0.02   |     |     | 0.003            |
| PCB 49/43       | 0.11                 | *** | *   | 0.13                      | *   | *   | 0.10       | *   |     | 0.618            | 0.40                                         | *** | **  | 0.19   | *** | *   | 0.01      |     |     | 0.00   |     |     | 0.001            |
| PCB 52/73       | 0.08                 | .   |     | 0.15                      | .   |     | 0.07       |     |     | 0.351            | 0.59                                         | **  | *   | 0.24   | **  |     | 0.03      |     |     | 0.01   |     |     | 0.007            |
| PCB 66/80       | 0.15                 | *** | *** | 0.19                      | *** | *** | 0.10       | *   |     | 0.132            | 0.37                                         | *** | *** | 0.19   | *** | *   | 0.07      |     |     | 0.08   |     |     | 0.017            |
| PCB 70/76       | 0.11                 | *** | *   | 0.12                      | *   | *   | 0.11       | *   |     | 0.752            | 0.36                                         | *** | **  | 0.19   | *** | *   | 0.02      |     |     | 0.02   |     |     | 0.006            |
| PCB 74/61       | 0.06                 | *   |     | 0.04                      |     |     | 0.10       | *   |     | 0.359            | 0.11                                         | .   |     | 0.17   | *   |     | 0.05      |     |     | 0.00   |     |     | 0.183            |
| PCB 90/101/89   | 0.10                 | *   |     | 0.17                      | *   | .   | 0.08       | .   |     | 0.263            | 0.57                                         | *** | **  | 0.24   | **  | *   | 0.01      |     |     | -0.01  |     |     | <0.001           |
| PCB 93/95       | 0.07                 |     |     | 0.48                      | *   | *   | 0.05       |     |     | 0.031            | 1.57                                         | *** | *** | 0.76   | *** | **  | -0.11     |     |     | 0.02   |     |     | <0.001           |
| PCB 99          | 0.04                 |     |     | 0.01                      |     |     | 0.06       |     |     | 0.602            | 0.35                                         | *** | **  | 0.15   | .   |     | 0.22      |     |     | -0.10  | .   |     | <0.001           |
| PCB 85/120      | 0.09                 | **  | .   | 0.13                      | *   | *   | 0.07       |     |     | 0.321            | 0.24                                         | **  | *   | 0.10   | .   |     | 0.09      |     |     | 0.01   |     |     | 0.110            |
| PCB 110         | 0.11                 | **  | .   | 0.18                      | **  | *   | 0.08       | .   |     | 0.188            | 0.49                                         | *** | **  | 0.18   | **  |     | 0.05      |     |     | 0.01   |     |     | 0.002            |

| Chemicals   | Overall<br>(n=2,284) |     |     | Interaction by infant sex |     |     |            |     |     | Interaction by maternal race/ethnicity group |        |     |     |        |     |     |           |   |     |        |     |     |                  |
|-------------|----------------------|-----|-----|---------------------------|-----|-----|------------|-----|-----|----------------------------------------------|--------|-----|-----|--------|-----|-----|-----------|---|-----|--------|-----|-----|------------------|
|             | beta                 | p   | FDR | Boys Only                 |     |     | Girls Only |     |     | P <sub>int</sub>                             | Whites |     |     | Blacks |     |     | Hispanics |   |     | Asians |     |     | P <sub>int</sub> |
|             |                      |     |     | beta                      | p   | FDR | beta       | p   | FDR |                                              | beta   | p   | FDR | beta   | p   | FDR | beta      | p | FDR | beta   | p   | FDR |                  |
| PCB 118/106 | 0.03                 |     |     | -0.01                     |     |     | 0.06       |     |     | 0.257                                        | 0.18   | *** | **  | 0.05   |     |     | 0.04      |   |     | -0.17  | **  | *   | <0.001           |
| PCB 105/127 | 0.04                 |     |     | 0.03                      |     |     | 0.05       |     |     | 0.732                                        | 0.20   | *** | **  | 0.03   |     |     | 0.08      |   |     | -0.15  | **  | .   | <0.001           |
| PCB 114/122 | 0.05                 |     |     | 0.07                      |     |     | 0.03       |     |     | 0.525                                        | 0.08   | *   |     | 0.04   |     |     | 0.09      |   |     | -0.12  |     |     | 0.154            |
| PCB 128     | -0.02                |     |     | 0.00                      |     |     | -0.05      |     |     | 0.388                                        | 0.11   | *   |     | 0.02   |     |     | -0.02     |   |     | -0.24  | *** | *** | <0.001           |
| PCB 137     | 0.00                 |     |     | -0.04                     |     |     | 0.04       |     |     | 0.246                                        | 0.09   | .   |     | 0.05   |     |     | 0.00      |   |     | -0.12  | *   |     | 0.037            |
| PCB 138/158 | -0.02                |     |     | -0.09                     | *   |     | 0.05       |     |     | 0.029                                        | 0.15   | **  | *   | 0.03   |     |     | 0.08      |   |     | -0.26  | *** | *** | <0.001           |
| PCB 146/161 | -0.05                |     |     | -0.08                     | .   |     | -0.02      |     |     | 0.358                                        | 0.24   | **  | *   | 0.11   |     |     | 0.05      |   |     | -0.28  | *** | *** | <0.001           |
| PCB 153     | -0.01                |     |     | -0.06                     |     |     | 0.04       |     |     | 0.101                                        | 0.15   | **  | *   | 0.08   |     |     | 0.15      |   |     | -0.26  | *** | *** | <0.001           |
| PCB 156     | 0.01                 |     |     | -0.01                     |     |     | 0.04       |     |     | 0.268                                        | 0.07   | *   |     | -0.05  |     |     | 0.07      |   |     | -0.25  | *** | **  | <0.001           |
| PCB 157     | 0.00                 |     |     | 0.00                      |     |     | 0.00       |     |     | 0.984                                        | 0.10   | *   |     | -0.14  | .   |     | 0.04      |   |     | -0.18  | **  | *   | <0.001           |
| PCB 167     | -0.09                | **  | .   | -0.11                     | **  | *   | -0.06      |     |     | 0.356                                        | 0.10   | *   |     | -0.14  |     |     | -0.15     | . |     | -0.25  | *** | *** | <0.001           |
| PCB 170     | -0.02                |     |     | -0.03                     |     |     | 0.01       |     |     | 0.457                                        | 0.04   |     |     | 0.09   |     |     | -0.11     |   |     | -0.28  | *** | *** | <0.001           |
| PCB 172/192 | -0.05                |     |     | -0.04                     |     |     | -0.04      |     |     | 1.000                                        | 0.05   |     |     | 0.16   | .   |     | -0.20     | * |     | -0.22  | *** | *** | <0.001           |
| PCB 177     | 0.00                 |     |     | -0.05                     |     |     | 0.05       |     |     | 0.122                                        | 0.16   | **  | *   | 0.22   | *   |     | 0.06      |   |     | -0.24  | *** | *** | <0.001           |
| PCB 180     | -0.03                |     |     | -0.05                     |     |     | 0.00       |     |     | 0.380                                        | 0.05   |     |     | 0.15   |     |     | -0.12     |   |     | -0.28  | *** | *** | <0.001           |
| PCB 182/187 | 0.02                 |     |     | -0.02                     |     |     | 0.04       |     |     | 0.402                                        | 0.26   | *** | **  | 0.36   | **  | .   | 0.23      |   |     | -0.16  | **  | *   | <0.001           |
| PCB 183     | 0.02                 |     |     | -0.02                     |     |     | 0.06       |     |     | 0.267                                        | 0.13   | **  | .   | 0.26   | *   |     | -0.05     |   |     | -0.19  | *** | **  | <0.001           |
| PCB 194     | -0.02                |     |     | -0.03                     |     |     | -0.02      |     |     | 0.878                                        | 0.02   |     |     | 0.21   | .   |     | -0.16     |   |     | -0.29  | *** | *** | <0.001           |
| PCB 195     | 0.00                 |     |     | -0.02                     |     |     | 0.03       |     |     | 0.431                                        | 0.06   | .   |     | 0.23   | .   |     | -0.12     |   |     | -0.25  | *** | *** | <0.001           |
| PCB 196/203 | -0.06                | *   |     | -0.06                     | .   |     | -0.07      |     |     | 0.864                                        | 0.02   |     |     | 0.02   |     |     | -0.14     |   |     | -0.31  | *** | *** | <0.001           |
| PCB 199     | -0.06                | .   |     | -0.06                     | .   |     | -0.05      |     |     | 0.887                                        | 0.04   |     |     | 0.05   |     |     | -0.08     |   |     | -0.28  | *** | *** | <0.001           |
| PCB 202     | -0.04                |     |     | -0.07                     |     |     | -0.02      |     |     | 0.470                                        | 0.18   | *   |     | 0.16   | .   |     | 0.03      |   |     | -0.20  | *** | *** | <0.001           |
| PCB 206     | -0.09                | *   |     | -0.12                     | *   | *   | -0.04      |     |     | 0.292                                        | 0.02   |     |     | 0.20   | *   |     | -0.01     |   |     | -0.40  | *** | *** | <0.001           |
| PCB 208     | -0.15                | *** | **  | -0.20                     | *** | **  | -0.09      |     |     | 0.124                                        | -0.03  |     |     | 0.01   |     |     | -0.04     |   |     | -0.30  | *** | *** | 0.003            |
| PCB 209     | -0.04                |     |     | -0.08                     |     |     | -0.02      |     |     | 0.459                                        | 0.08   |     |     | -0.03  |     |     | 0.18      | . |     | -0.22  | *** | *   | 0.002            |
| NMeFOSAA    | 0.04                 |     |     | 0.13                      | *** | **  | -0.06      |     |     | <0.001                                       | 0.00   |     |     | 0.11   | *   |     | -0.11     | * |     | 0.14   | *   |     | 0.005            |
| PFDA        | 0.08                 | **  | .   | 0.04                      |     |     | 0.11       | **  | .   | 0.163                                        | 0.35   | *** | *** | 0.19   | *** | **  | -0.05     |   |     | -0.30  | *** | *** | <0.001           |
| PFDoDA      | -0.02                |     |     | -0.03                     |     |     | -0.02      |     |     | 0.823                                        | 0.21   | **  | *   | 0.14   | **  | .   | -0.07     | * |     | -0.32  | *** | *** | <0.001           |
| PFDS        | -0.05                |     |     | -0.06                     |     |     | -0.03      |     |     | 0.648                                        | 0.12   |     |     | 0.01   |     |     | 0.08      |   |     | -0.17  | *** | **  | 0.002            |
| PFHpA       | 0.14                 | *** | *** | 0.09                      | *   | *   | 0.19       | *** | *** | 0.038                                        | 0.21   | *** | *** | 0.34   | *** | *** | -0.01     |   |     | 0.09   |     |     | 0.000            |
| PFHxS       | 0.13                 | *** | *** | 0.12                      | **  | *   | 0.13       | *** | *   | 0.838                                        | 0.17   | *** | **  | 0.11   | *   |     | 0.00      |   |     | 0.19   | *   |     | 0.144            |
| PFNA        | 0.07                 | **  | .   | 0.00                      |     |     | 0.14       | *** | **  | 0.008                                        | 0.35   | *** | *** | 0.16   | **  | *   | 0.00      |   |     | -0.28  | *** | *** | <0.001           |
| PFOA        | 0.15                 | *** | *** | 0.08                      | *   |     | 0.22       | *** | *** | 0.007                                        | 0.18   | *** | **  | 0.33   | *** | *** | 0.00      |   |     | 0.09   |     |     | <0.001           |
| PFOS        | 0.05                 | .   |     | 0.05                      |     |     | 0.05       |     |     | 0.903                                        | 0.30   | *** | *** | 0.15   | **  | .   | 0.00      |   |     | -0.31  | *** | *** | <0.001           |
| PFOSA       | -0.12                | *** | *** | -0.08                     | *   | .   | -0.19      | *** | *** | 0.025                                        | -0.09  | .   |     | -0.19  | *** | **  | -0.01     |   |     | -0.15  | *** | **  | 0.075            |
| PFUnDA      | 0.00                 |     |     | -0.03                     |     |     | 0.02       |     |     | 0.408                                        | 0.36   | *** | *** | 0.10   | *   |     | 0.03      |   |     | -0.27  | *** | *** | <0.001           |

P-values: \*\*\*<0.001 ; \*\*0.001-0.01 ; \*<0.01-0.05 ; . 0.05-0.1

FDR: p-values after false discovery rate correction (\*\*\*<0.001 ; \*\*0.001-0.01 ; \*<0.01-0.05 ; . 0.05-0.1)

P<sub>int</sub>: p-values of interaction

Adjusted for maternal race/ethnicity (White, Black, Hispanic, Asian), maternal age (years, continuous), pre-pregnancy BMI (kg/m<sup>2</sup>, continuous), parity (0,1,2, 3 or more), highest level of education (Less than high school, High school diploma or GED or equivalent, Some college or Associate degree, Bachelors degree, Masters degree or Advanced degree), marital status (not married vs. living as married), infant sex (male, female), gestational age at the time of ultrasound (continuous), total serum lipids (except for PFASs, ng/mL, continuous) and log transformed plasma cotinine level (log(x+1), continuous), with repeated measurements of fetal growth (random effect variable corresponding to the mother-child pair), and with a smooth function for the gestational age.

**eTable 16: Association between EDCs and longitudinal fibula length using a generalized additive mixed model, NICHD Fetal Growth Studies – Singletons (n=2,284).**

| Chemicals       | Overall<br>(n=2,284) |     |     | Interaction by infant sex |     |     |            |     |     |                  | Interaction by maternal race/ethnicity group |     |     |        |     |     |           |     |     |        |     |     |                  |
|-----------------|----------------------|-----|-----|---------------------------|-----|-----|------------|-----|-----|------------------|----------------------------------------------|-----|-----|--------|-----|-----|-----------|-----|-----|--------|-----|-----|------------------|
|                 | beta                 | p   | FDR | Boys Only                 |     |     | Girls Only |     |     | P <sub>int</sub> | Whites                                       |     |     | Blacks |     |     | Hispanics |     |     | Asians |     |     | P <sub>int</sub> |
|                 |                      |     |     | beta                      | p   | FDR | beta       | p   | FDR |                  | beta                                         | p   | FDR | beta   | p   | FDR | beta      | p   | FDR | beta   | p   | FDR |                  |
| β-HCH           | 0.17                 | *** | *** | 0.18                      | *** | *** | 0.15       | *** | **  | 0.633            | 0.25                                         |     |     | -0.64  | .   |     | -0.31     | .   |     | 0.18   | *** | *** | 0.008            |
| γ-HCH           | 0.07                 | *   |     | 0.07                      | *   | *   | 0.03       |     |     | 0.617            | -2.20                                        |     |     | -0.14  | .   |     | -2.61     | *   |     | 0.07   | **  | .   | 0.053            |
| HCB             | -0.04                |     |     | -0.04                     |     |     | -0.01      |     |     | 0.948            | 1.25                                         | *   |     | -0.79  | *   |     | -0.47     | *   |     | -0.03  |     |     | 0.003            |
| Oxychlorodane   | -0.06                |     |     | -1.60                     | *** | *** | -0.02      |     |     | <0.001           | -0.99                                        | *   |     | -1.13  | *   |     | -2.57     | *** | *   | -0.01  |     |     | <0.001           |
| Trans-chlordane | -0.03                |     |     | -0.04                     |     |     | 0.03       |     |     | 0.432            | 2.00                                         |     |     | 0.35   |     |     | -0.15     |     |     | -0.03  |     |     | 0.656            |
| Trans-nonachlor | -0.08                | .   |     | -0.45                     | *** | **  | -0.02      |     |     | 0.003            | -0.19                                        |     |     | -0.17  |     |     | -0.60     | *** |     | -0.01  |     |     | 0.016            |
| p,p'-DDE        | -0.08                | **  |     | -0.15                     | *** | **  | -0.01      |     |     | 0.005            | -0.78                                        | *** | *** | -0.35  | **  | *   | -0.03     |     |     | 0.00   |     |     | <0.001           |
| o,p'-DDD        | -0.08                | **  | .   | -0.02                     |     |     | -0.11      | *** | *   | 0.063            | -0.02                                        |     |     | -0.12  | *   |     | 0.10      | .   |     | -0.13  | *** | **  | 0.005            |
| p,p'-DDD        | 0.03                 |     |     | 0.02                      |     |     | 0.04       |     |     | 0.689            | -0.05                                        |     |     | -0.10  |     |     | 0.13      | .   |     | 0.04   |     |     | 0.162            |
| p,p'-DDT        | 0.03                 |     |     | 0.01                      |     |     | 0.05       |     |     | 0.428            | 0.56                                         |     |     | -0.33  | .   |     | 0.00      |     |     | 0.10   | *   |     | 0.030            |
| Mirex           | -0.10                | *** | **  | -0.14                     | *** | *** | -0.06      |     |     | 0.095            | 0.28                                         | **  | *   | -0.17  |     |     | -0.08     | *   |     | -0.26  | *** | *** | <0.001           |
| PBB 153         | 0.01                 |     |     | -0.01                     |     |     | 0.03       |     |     | 0.491            | 0.06                                         |     |     | -0.08  |     |     | -0.01     |     |     | -0.02  |     |     | 0.413            |
| PBDE 28         | -0.05                | *   |     | -0.01                     |     |     | -0.28      | *** | **  | <0.001           | -0.53                                        | *** | *** | -0.06  | .   |     | 0.01      |     |     | 0.01   |     |     | <0.001           |
| PBDE 47         | -0.08                | **  | .   | 0.01                      |     |     | -0.15      | *** | **  | <0.001           | -0.18                                        | *** | **  | 0.01   |     |     | -0.08     |     |     | -0.04  |     |     | 0.037            |
| PBDE 85         | -0.02                |     |     | 0.01                      |     |     | -0.06      |     |     | 0.153            | -0.07                                        | .   |     | 0.21   | *** | *   | -0.02     |     |     | -0.20  | *   |     | <0.001           |
| PBDE 99         | 0.04                 |     |     | 0.08                      | *   | *   | -0.03      |     |     | 0.037            | -0.07                                        |     |     | 0.09   | *   |     | 0.00      |     |     | 0.09   |     |     | 0.073            |
| PBDE 100        | -0.10                | *** | **  | -0.03                     |     |     | -0.18      | *** | *** | 0.002            | -0.23                                        | *** | *** | -0.14  | **  | .   | -0.01     |     |     | -0.03  |     |     | 0.007            |
| PBDE 153        | -0.10                | *** | **  | -0.08                     | *   | .   | -0.12      | **  | .   | 0.492            | -0.15                                        | *** | **  | -0.04  |     |     | -0.02     |     |     | -0.05  |     |     | 0.214            |
| PBDE 154        | -0.03                |     |     | 0.02                      |     |     | -0.09      | *   | .   | 0.019            | -0.08                                        | .   |     | 0.00   |     |     | 0.07      |     |     | -0.18  | **  | .   | 0.007            |
| PBDE 183        | 0.08                 | *** | *   | 0.08                      | **  | *   | 0.10       | *   | .   | 0.706            | 0.09                                         |     |     | 0.09   |     |     | 0.09      |     |     | 0.09   |     |     | 0.954            |
| PBDE 209        | -0.06                | *   |     | -0.04                     |     |     | -0.08      | *   | .   | 0.415            | -0.04                                        |     |     | -0.08  |     |     | -0.04     |     |     | -0.04  |     |     | 0.033            |
| PCB 5/8         | 0.06                 | .   |     | 0.09                      | .   |     | 0.04       |     |     | 0.385            | 0.46                                         | .   |     | 0.23   | **  |     | 0.04      |     |     | -0.03  |     |     | 0.033            |
| PCB 18/17       | 0.05                 | *   |     | 0.05                      | *   | .   | 0.78       | *   | .   | 0.019            | 0.05                                         | *   |     | 2.71   | *** | *** | -0.82     | *   |     | -0.36  |     |     | <0.001           |
| PCB 22          | 0.11                 | *** | **  | 0.09                      | *   | .   | 0.14       | **  | .   | 0.437            | 0.27                                         | **  | .   | 0.38   | *** | *** | 0.03      |     |     | 0.07   |     |     | <0.001           |
| PCB 31/28       | 0.14                 | *** | *** | 0.15                      | *** | *** | 0.13       | **  | .   | 0.742            | 0.22                                         | *   |     | 0.35   | *** | *** | 0.03      |     |     | 0.24   | *** | *** | <0.001           |
| PCB 33/20       | 0.10                 | *** | *   | 0.08                      | .   |     | 0.13       | **  | .   | 0.357            | 0.27                                         | **  | .   | 0.39   | *** | *** | 0.03      |     |     | -0.02  |     |     | <0.001           |
| PCB 37          | 0.12                 | *** | **  | 0.12                      | **  | *   | 0.13       | **  | .   | 0.958            | 0.25                                         | **  | .   | 0.37   | *** | *** | 0.03      |     |     | 0.08   |     |     | <0.001           |
| PCB 41/64       | 0.11                 | **  | *   | 0.18                      | **  | *   | 0.08       | .   |     | 0.128            | 0.45                                         | *** | *** | 0.17   | **  | .   | 0.00      |     |     | 0.02   |     |     | <0.001           |
| PCB 44          | 0.09                 | **  |     | 0.16                      | **  | *   | 0.06       |     |     | 0.179            | 0.37                                         | *** | **  | 0.16   | **  |     | 0.00      |     |     | 0.01   |     |     | 0.006            |
| PCB 47/48/75    | 0.09                 | **  |     | 0.17                      | **  | *   | 0.06       |     |     | 0.106            | 0.44                                         | *** | **  | 0.12   | *   |     | 0.00      |     |     | 0.01   |     |     | 0.003            |
| PCB 49/43       | 0.09                 | **  | .   | 0.14                      | *   | *   | 0.08       | .   |     | 0.326            | 0.38                                         | *** | **  | 0.16   | **  | .   | 0.02      |     |     | -0.02  |     |     | 0.002            |
| PCB 52/73       | 0.05                 |     |     | 0.18                      | .   |     | 0.03       |     |     | 0.132            | 0.55                                         | **  | .   | 0.17   | .   |     | 0.05      |     |     | -0.01  |     |     | 0.020            |
| PCB 66/80       | 0.12                 | *** | **  | 0.20                      | *** | *** | 0.05       |     |     | 0.015            | 0.33                                         | *** | **  | 0.14   | **  |     | 0.05      |     |     | 0.08   |     |     | 0.059            |
| PCB 70/76       | 0.09                 | **  | .   | 0.13                      | **  | *   | 0.07       |     |     | 0.311            | 0.32                                         | **  | *   | 0.15   | **  | .   | 0.03      |     |     | 0.01   |     |     | 0.024            |
| PCB 74/61       | 0.02                 |     |     | 0.04                      |     |     | 0.01       |     |     | 0.547            | 0.10                                         | .   |     | 0.06   |     |     | -0.02     |     |     | -0.02  |     |     | 0.316            |
| PCB 90/101/89   | 0.06                 |     |     | 0.17                      | *   | .   | 0.03       |     |     | 0.109            | 0.55                                         | *** | **  | 0.17   | *   |     | -0.01     |     |     | -0.02  |     |     | <0.001           |
| PCB 93/95       | 0.04                 |     |     | 0.48                      | *   | .   | 0.02       |     |     | 0.023            | 1.54                                         | *** | **  | 0.60   | **  | .   | -0.11     |     |     | 0.00   |     |     | <0.001           |
| PCB 99          | -0.01                |     |     | 0.00                      |     |     | 0.00       |     |     | 0.881            | 0.34                                         | *** | **  | 0.04   |     |     | 0.01      |     |     | -0.12  | *   |     | <0.001           |
| PCB 85/120      | 0.06                 | .   |     | 0.12                      | *   | .   | 0.02       |     |     | 0.110            | 0.22                                         | **  | .   | 0.04   |     |     | 0.07      |     |     | 0.00   |     |     | 0.158            |
| PCB 110         | 0.08                 | *   |     | 0.18                      | **  | *   | 0.04       |     |     | 0.067            | 0.46                                         | *** | **  | 0.14   | *   |     | 0.05      |     |     | -0.01  |     |     | 0.004            |

| Chemicals   | Overall<br>(n=2,284) |     |     | Interaction by infant sex |     |     |            |     |     |                  | Interaction by maternal race/ethnicity group |     |     |        |     |     |           |    |     |        |     |     |                  |
|-------------|----------------------|-----|-----|---------------------------|-----|-----|------------|-----|-----|------------------|----------------------------------------------|-----|-----|--------|-----|-----|-----------|----|-----|--------|-----|-----|------------------|
|             | beta                 | p   | FDR | Boys Only                 |     |     | Girls Only |     |     |                  | Whites                                       |     |     | Blacks |     |     | Hispanics |    |     | Asians |     |     | P <sub>int</sub> |
|             |                      |     |     | beta                      | p   | FDR | beta       | p   | FDR | P <sub>int</sub> | beta                                         | p   | FDR | beta   | p   | FDR | beta      | p  | FDR | beta   | p   | FDR |                  |
| PCB 118/106 | -0.01                |     |     | 0.00                      |     |     | -0.01      |     |     | 0.832            | 0.20                                         | *** | **  | -0.05  |     |     | -0.10     |    |     | -0.19  | **  | *   | <0.001           |
| PCB 105/127 | 0.00                 |     |     | 0.03                      |     |     | -0.02      |     |     | 0.401            | 0.21                                         | *** | **  | -0.06  |     |     | -0.05     |    |     | -0.17  | **  | .   | <0.001           |
| PCB 114/122 | 0.03                 |     |     | 0.08                      | .   |     | 0.00       |     |     | 0.162            | 0.10                                         | *   |     | -0.01  |     |     | 0.05      |    |     | -0.19  | *   | .   | 0.019            |
| PCB 128     | -0.03                |     |     | 0.02                      |     |     | -0.09      | *   |     | 0.043            | 0.13                                         | *   |     | -0.02  |     |     | -0.07     |    |     | -0.21  | *** | **  | 0.000            |
| PCB 137     | -0.02                |     |     | -0.01                     |     |     | -0.02      |     |     | 0.789            | 0.09                                         | .   |     | -0.03  |     |     | -0.04     |    |     | -0.15  | **  | .   | 0.012            |
| PCB 138/158 | -0.07                | *   |     | -0.10                     | *   | .   | -0.03      |     |     | 0.311            | 0.15                                         | **  | .   | -0.11  |     |     | -0.07     |    |     | -0.27  | *** | *** | <0.001           |
| PCB 146/161 | -0.07                | *   |     | -0.07                     |     |     | -0.07      |     |     | 0.973            | 0.26                                         | *** | **  | 0.02   |     |     | -0.01     |    |     | -0.28  | *** | *** | <0.001           |
| PCB 153     | -0.05                |     |     | -0.08                     | .   |     | -0.02      |     |     | 0.415            | 0.15                                         | **  | .   | -0.03  |     |     | -0.03     |    |     | -0.27  | *** | *** | <0.001           |
| PCB 156     | -0.01                |     |     | -0.01                     |     |     | -0.01      |     |     | 0.947            | 0.08                                         | *   |     | -0.17  | *   |     | -0.01     |    |     | -0.28  | *** | **  | <0.001           |
| PCB 157     | -0.02                |     |     | 0.00                      |     |     | -0.04      |     |     | 0.494            | 0.10                                         | **  | .   | -0.24  | **  | .   | 0.01      |    |     | -0.21  | *** | **  | <0.001           |
| PCB 167     | -0.10                | **  | .   | -0.10                     | *   | .   | -0.09      | *   |     | 0.932            | 0.13                                         | *   |     | -0.21  | *   |     | -0.19     | *  |     | -0.26  | *** | *** | <0.001           |
| PCB 170     | -0.04                |     |     | -0.03                     |     |     | -0.06      |     |     | 0.676            | 0.04                                         |     |     | -0.11  |     |     | -0.20     | .  |     | -0.28  | *** | *** | <0.001           |
| PCB 172/192 | -0.07                | *   |     | -0.05                     |     |     | -0.11      | *   |     | 0.252            | 0.05                                         |     |     | 0.04   |     |     | -0.27     | ** |     | -0.22  | *** | *** | <0.001           |
| PCB 177     | -0.03                |     |     | -0.05                     |     |     | 0.01       |     |     | 0.432            | 0.17                                         | **  | *   | 0.11   |     |     | -0.09     |    |     | -0.25  | *** | *** | <0.001           |
| PCB 180     | -0.06                | .   |     | -0.05                     |     |     | -0.07      |     |     | 0.653            | 0.04                                         |     |     | -0.01  |     |     | -0.20     | *  |     | -0.28  | *** | *** | <0.001           |
| PCB 182/187 | -0.01                |     |     | -0.03                     |     |     | 0.00       |     |     | 0.810            | 0.26                                         | *** | *   | 0.24   | .   |     | -0.03     |    |     | -0.16  | **  | *   | <0.001           |
| PCB 183     | 0.00                 |     |     | -0.01                     |     |     | 0.02       |     |     | 0.646            | 0.14                                         | **  | .   | 0.20   | .   |     | -0.15     |    |     | -0.20  | *** | **  | <0.001           |
| PCB 194     | -0.04                |     |     | -0.02                     |     |     | -0.11      | .   |     | 0.177            | 0.02                                         |     |     | 0.12   |     |     | -0.31     | *  |     | -0.27  | *** | *** | <0.001           |
| PCB 195     | -0.01                |     |     | 0.00                      |     |     | -0.04      |     |     | 0.520            | 0.06                                         | .   |     | 0.11   |     |     | -0.26     | *  |     | -0.23  | *** | **  | <0.001           |
| PCB 196/203 | -0.07                | *   |     | -0.04                     |     |     | -0.15      | **  |     | 0.069            | 0.02                                         |     |     | -0.04  |     |     | -0.32     | *  |     | -0.30  | *** | *** | <0.001           |
| PCB 199     | -0.07                | *   |     | -0.05                     |     |     | -0.12      | *   |     | 0.233            | 0.04                                         |     |     | -0.04  |     |     | -0.23     | .  |     | -0.27  | *** | *** | <0.001           |
| PCB 202     | -0.08                | *   |     | -0.08                     |     |     | -0.08      |     |     | 0.985            | 0.17                                         | *   |     | 0.05   |     |     | -0.16     |    |     | -0.21  | *** | *** | <0.001           |
| PCB 206     | -0.06                | .   |     | -0.07                     |     |     | -0.07      |     |     | 0.986            | 0.05                                         |     |     | 0.20   | *   |     | -0.13     |    |     | -0.35  | *** | *** | <0.001           |
| PCB 208     | -0.15                | *** | **  | -0.17                     | **  | *   | -0.13      | *   |     | 0.572            | -0.01                                        |     |     | 0.02   |     |     | -0.20     |    |     | -0.29  | *** | *** | 0.005            |
| PCB 209     | -0.07                | .   |     | -0.09                     |     |     | -0.06      |     |     | 0.696            | 0.03                                         |     |     | -0.09  |     |     | 0.08      |    |     | -0.18  | **  | .   | 0.068            |
| NMeFOSAA    | 0.07                 | *   |     | 0.16                      | *** | *** | -0.02      |     |     | 0.001            | -0.02                                        |     |     | 0.15   | **  | .   | -0.03     |    |     | 0.15   | *   | .   | 0.017            |
| PFDA        | 0.05                 | .   |     | 0.04                      |     |     | 0.05       |     |     | 0.839            | 0.36                                         | *** | *** | 0.15   | **  | .   | -0.07     |    |     | -0.36  | *** | *** | <0.001           |
| PFDoDA      | -0.04                | .   |     | -0.01                     |     |     | -0.05      | .   |     | 0.425            | 0.27                                         | *** | **  | 0.13   | *   |     | -0.10     | ** |     | -0.37  | *** | *** | <0.001           |
| PFDS        | -0.06                | *   |     | -0.04                     |     |     | -0.08      | .   |     | 0.439            | 0.04                                         |     |     | 0.03   |     |     | 0.07      |    |     | -0.19  | *** | *** | <0.001           |
| PFHpA       | 0.15                 | *** | *** | 0.09                      | *   | *   | 0.21       | *** | *** | 0.025            | 0.20                                         | *** | *** | 0.41   | *** | *** | -0.01     |    |     | 0.09   |     |     | <0.001           |
| PFHxS       | 0.09                 | *** | *   | 0.10                      | **  | *   | 0.09       | *   |     | 0.855            | 0.16                                         | *** | **  | 0.06   |     |     | -0.05     |    |     | 0.16   | *   | .   | 0.037            |
| PFNA        | 0.04                 |     |     | 0.00                      |     |     | 0.08       | *   |     | 0.151            | 0.35                                         | *** | *** | 0.11   | *   |     | -0.04     |    |     | -0.32  | *** | *** | <0.001           |
| PFOA        | 0.10                 | *** | *   | 0.06                      |     |     | 0.14       | *** | *   | 0.146            | 0.17                                         | *** | **  | 0.24   | *** | **  | -0.10     | .  |     | 0.07   |     |     | <0.001           |
| PFOS        | 0.02                 |     |     | 0.04                      |     |     | -0.01      |     |     | 0.260            | 0.28                                         | *** | *** | 0.10   | .   |     | -0.02     |    |     | -0.32  | *** | *** | <0.001           |
| PFOSA       | -0.11                | *** | **  | -0.12                     | *** | **  | -0.11      | **  |     | 0.862            | -0.12                                        | *   |     | -0.17  | *** | *   | 0.08      |    |     | -0.17  | *** | **  | 0.003            |
| PFUnDA      | -0.04                |     |     | -0.01                     |     |     | -0.05      |     |     | 0.494            | 0.37                                         | *** | *** | 0.06   |     |     | -0.05     |    |     | -0.29  | *** | *** | <0.001           |

P-values: \*\*\*<0.001 ; \*\*0.001-0.01 ; \*<0.01-0.05 ; . 0.05-0.1

FDR: p-values after false discovery rate correction (\*\*\*<0.001 ; \*\*0.001-0.01 ; \*<0.01-0.05 ; . 0.05-0.1)

P<sub>int</sub>: p-values of interaction

Adjusted for maternal race/ethnicity (White, Black, Hispanic, Asian), maternal age (years, continuous), pre-pregnancy BMI (kg/m<sup>2</sup>, continuous), parity (0,1,2, 3 or more), highest level of education (Less than high school, High school diploma or GED or equivalent, Some college or Associate degree, Bachelors degree, Masters degree or Advanced degree), marital status (not married vs. living as married), infant sex (male, female), gestational age at the time of ultrasound (continuous), total serum lipids (except for PFASs, ng/mL, continuous) and log transformed plasma cotinine level (log(x+1), continuous), with repeated measurements of fetal growth (random effect variable corresponding to the mother-child pair), and with a smooth function for the gestational age.

**eTable 17: Association between EDCs and longitudinal foot length using a generalized additive mixed model, NICHD Fetal Growth Studies – Singletons (n=2,284).**

| Chemicals       | Overall<br>(n=2,284) |    |     | Interaction by infant sex |   |     |            |     |     | Interaction by maternal race/ethnicity group |        |     |     |        |     |     |           |   |     |        |     |     |                  |
|-----------------|----------------------|----|-----|---------------------------|---|-----|------------|-----|-----|----------------------------------------------|--------|-----|-----|--------|-----|-----|-----------|---|-----|--------|-----|-----|------------------|
|                 | beta                 | p  | FDR | Boys Only                 |   |     | Girls Only |     |     | P <sub>int</sub>                             | Whites |     |     | Blacks |     |     | Hispanics |   |     | Asians |     |     | P <sub>int</sub> |
|                 |                      |    |     | beta                      | p | FDR | beta       | p   | FDR |                                              | beta   | p   | FDR | beta   | p   | FDR | beta      | p | FDR | beta   | p   | FDR |                  |
| β-HCH           | 0.10                 | *  |     | 0.13                      | * |     | 0.07       |     |     | 0.546                                        | 0.03   |     |     | -0.29  |     |     | -0.12     |   |     | 0.11   | *   |     | 0.823            |
| γ-HCH           | -0.08                | .  |     | -0.07                     |   |     | -0.25      |     |     | 0.312                                        | -0.96  |     |     | -2.37  | **  |     | 1.54      |   |     | -0.08  | .   |     | 0.033            |
| HCB             | -0.04                |    |     | -0.05                     |   |     | 0.29       |     |     | 0.365                                        | 0.73   |     |     | -0.01  |     |     | 0.36      |   |     | -0.05  |     |     | 0.650            |
| Oxychlorodane   | -0.02                |    |     | -1.00                     | . |     | 0.00       |     |     | 0.071                                        | 0.05   |     |     | -1.09  |     |     | -0.53     |   |     | -0.01  |     |     | 0.564            |
| Trans-chlordane | -0.04                |    |     | -0.07                     |   |     | 0.03       |     |     | 0.429                                        | -0.33  |     |     | 2.90   | *   |     | 2.55      |   |     | -0.05  |     |     | 0.121            |
| Trans-nonachlor | 0.02                 |    |     | -0.17                     |   |     | 0.05       |     |     | 0.305                                        | -0.04  |     |     | 0.18   |     |     | -0.13     |   |     | 0.03   |     |     | 0.857            |
| p,p'-DDE        | 0.02                 |    |     | -0.05                     |   |     | 0.10       |     |     | 0.067                                        | -0.47  | *   |     | 0.19   |     |     | -0.05     |   |     | 0.15   | .   |     | 0.010            |
| o,p'-DDD        | -0.11                | ** |     | -0.12                     | . |     | -0.11      | *   |     | 0.977                                        | -0.21  |     |     | -0.41  | *** | *** | 0.09      |   |     | -0.03  |     |     | <0.001           |
| p,p'-DDD        | 0.12                 | ** |     | 0.11                      |   |     | 0.13       | *   |     | 0.872                                        | 0.08   |     |     | 0.08   |     |     | 0.06      |   |     | 0.14   | **  |     | 0.926            |
| p,p'-DDT        | 0.12                 | ** |     | 0.12                      | * |     | 0.13       | *   |     | 0.884                                        | 0.02   |     |     | 0.19   |     |     | 0.04      |   |     | 0.24   | *** |     | 0.143            |
| Mirex           | 0.00                 |    |     | 0.03                      |   |     | -0.04      |     |     | 0.446                                        | 0.22   |     |     | 0.16   |     |     | -0.04     |   |     | -0.05  |     |     | 0.248            |
| PBB 153         | -0.09                | *  |     | -0.03                     |   |     | -0.20      | **  |     | 0.034                                        | -0.13  | *   |     | -0.41  | *   |     | 0.30      | * |     | -0.11  | .   |     | 0.002            |
| PBDE 28         | -0.03                |    |     | -0.01                     |   |     | -0.16      |     |     | 0.183                                        | -1.05  | *** | *** | -0.01  |     |     | -0.02     |   |     | 0.11   |     |     | <0.001           |
| PBDE 47         | -0.08                | .  |     | 0.05                      |   |     | -0.19      | *** |     | 0.005                                        | -0.28  | *** | *   | 0.01   |     |     | -0.01     |   |     | 0.04   |     |     | 0.017            |
| PBDE 85         | -0.08                | *  |     | -0.02                     |   |     | -0.18      | **  |     | 0.059                                        | -0.17  | **  |     | 0.10   |     |     | 0.01      |   |     | -0.41  | **  |     | 0.007            |
| PBDE 99         | 0.01                 |    |     | 0.07                      |   |     | -0.09      |     |     | 0.077                                        | -0.20  | *   |     | 0.14   | .   |     | 0.06      |   |     | -0.02  |     |     | 0.026            |
| PBDE 100        | -0.08                | .  |     | 0.01                      |   |     | -0.16      | **  |     | 0.027                                        | -0.26  | **  | .   | -0.05  |     |     | 0.01      |   |     | 0.02   |     |     | 0.065            |
| PBDE 153        | 0.02                 |    |     | 0.15                      | * |     | -0.11      | .   |     | 0.002                                        | -0.05  |     |     | 0.09   |     |     | 0.25      | . |     | -0.08  |     |     | 0.132            |
| PBDE 154        | -0.07                | .  |     | 0.00                      |   |     | -0.16      | **  |     | 0.039                                        | -0.15  | *   |     | 0.00   |     |     | 0.06      |   |     | -0.32  | **  |     | 0.016            |
| PBDE 183        | 0.01                 |    |     | 0.03                      |   |     | 0.00       |     |     | 0.697                                        | -0.02  |     |     | 0.27   |     |     | -0.02     |   |     | -0.02  |     |     | 0.034            |
| PBDE 209        | -0.12                | ** |     | 0.03                      |   |     | -0.25      | *** | *   | 0.002                                        | 0.03   |     |     | -0.25  |     |     | 0.03      |   |     | 0.03   |     |     | <0.001           |
| PCB 5/8         | -0.06                |    |     | 0.02                      |   |     | -0.11      | .   |     | 0.192                                        | 0.02   |     |     | -0.03  |     |     | -0.04     |   |     | -0.11  |     |     | 0.949            |
| PCB 18/17       | 0.05                 |    |     | 0.06                      | . |     | -1.28      | *   |     | 0.028                                        | 0.05   | .   |     | 1.48   |     |     | -0.54     |   |     | -2.43  |     |     | 0.309            |
| PCB 22          | 0.00                 |    |     | 0.05                      |   |     | -0.07      |     |     | 0.188                                        | 0.11   |     |     | 0.13   |     |     | -0.03     |   |     | -0.15  |     |     | 0.435            |
| PCB 31/28       | -0.01                |    |     | 0.05                      |   |     | -0.09      |     |     | 0.112                                        | 0.00   |     |     | 0.10   |     |     | -0.04     |   |     | 0.01   |     |     | 0.800            |
| PCB 33/20       | -0.02                |    |     | 0.04                      |   |     | -0.09      |     |     | 0.161                                        | 0.10   |     |     | 0.13   |     |     | -0.02     |   |     | -0.24  | .   |     | 0.224            |
| PCB 37          | 0.00                 |    |     | 0.05                      |   |     | -0.05      |     |     | 0.233                                        | 0.07   |     |     | 0.22   | *   |     | -0.03     |   |     | -0.18  |     |     | 0.109            |
| PCB 41/64       | -0.01                |    |     | 0.15                      |   |     | -0.09      |     |     | 0.035                                        | 0.32   | *   |     | 0.02   |     |     | -0.13     |   |     | -0.08  |     |     | 0.108            |
| PCB 44          | -0.04                |    |     | 0.14                      |   |     | -0.12      | .   |     | 0.018                                        | 0.27   | .   |     | 0.01   |     |     | -0.16     |   |     | -0.10  |     |     | 0.148            |
| PCB 47/48/75    | -0.05                |    |     | 0.08                      |   |     | -0.10      | .   |     | 0.094                                        | 0.12   |     |     | -0.02  |     |     | -0.16     |   |     | -0.07  |     |     | 0.569            |
| PCB 49/43       | -0.04                |    |     | 0.12                      |   |     | -0.12      | *   |     | 0.021                                        | 0.23   |     |     | 0.01   |     |     | -0.13     |   |     | -0.13  |     |     | 0.172            |
| PCB 52/73       | -0.06                |    |     | 0.09                      |   |     | -0.09      |     |     | 0.254                                        | 0.31   |     |     | -0.05  |     |     | -0.18     |   |     | -0.06  |     |     | 0.589            |
| PCB 66/80       | 0.00                 |    |     | 0.07                      |   |     | -0.06      |     |     | 0.161                                        | 0.17   |     |     | 0.05   |     |     | -0.09     |   |     | -0.05  |     |     | 0.375            |
| PCB 70/76       | -0.03                |    |     | 0.08                      |   |     | -0.10      |     |     | 0.063                                        | 0.19   |     |     | 0.05   |     |     | -0.08     |   |     | -0.13  |     |     | 0.266            |
| PCB 74/61       | -0.08                |    |     | -0.09                     |   |     | -0.06      |     |     | 0.775                                        | -0.01  |     |     | -0.01  |     |     | -0.12     |   |     | -0.13  | .   |     | 0.707            |
| PCB 90/101/89   | -0.06                |    |     | 0.10                      |   |     | -0.10      |     |     | 0.147                                        | 0.31   |     |     | -0.04  |     |     | -0.23     |   |     | -0.08  |     |     | 0.270            |
| PCB 93/95       | -0.03                |    |     | 0.35                      |   |     | -0.05      |     |     | 0.209                                        | 0.93   | .   |     | -0.07  |     |     | -0.58     |   |     | -0.03  |     |     | 0.220            |
| PCB 99          | -0.06                |    |     | -0.10                     |   |     | -0.04      |     |     | 0.662                                        | 0.21   |     |     | -0.13  |     |     | -0.14     |   |     | -0.11  |     |     | 0.213            |
| PCB 85/120      | 0.00                 |    |     | 0.10                      |   |     | -0.06      |     |     | 0.094                                        | 0.18   |     |     | -0.04  |     |     | 0.05      |   |     | -0.07  |     |     | 0.336            |
| PCB 110         | -0.04                |    |     | 0.12                      |   |     | -0.10      |     |     | 0.070                                        | 0.23   |     |     | -0.01  |     |     | -0.15     |   |     | -0.08  |     |     | 0.419            |



| Chemicals   | Overall<br>(n=2,284) |     |     | Interaction by infant sex |     |     |            |    |     | Interaction by maternal race/ethnicity group |       |     |        |       |     |           |       |   |        |       |    |                  |        |
|-------------|----------------------|-----|-----|---------------------------|-----|-----|------------|----|-----|----------------------------------------------|-------|-----|--------|-------|-----|-----------|-------|---|--------|-------|----|------------------|--------|
|             | beta                 | p   | FDR | Boys Only                 |     |     | Girls Only |    |     | Whites                                       |       |     | Blacks |       |     | Hispanics |       |   | Asians |       |    | P <sub>int</sub> |        |
|             |                      |     |     | beta                      | p   | FDR | beta       | p  | FDR | P <sub>int</sub>                             | beta  | p   | FDR    | beta  | p   | FDR       | beta  | p | FDR    | beta  | p  |                  | FDR    |
| PCB 118/106 | -0.06                |     |     | -0.06                     |     |     | -0.05      |    |     | 0.906                                        | 0.08  |     |        | -0.07 |     |           | -0.17 |   |        | -0.18 | *  |                  | 0.137  |
| PCB 105/127 | -0.05                |     |     | -0.05                     |     |     | -0.04      |    |     | 0.973                                        | 0.08  |     |        | -0.09 |     |           | -0.10 |   |        | -0.14 |    |                  | 0.277  |
| PCB 114/122 | 0.03                 |     |     | 0.06                      |     |     | 0.01       |    |     | 0.545                                        | 0.06  |     |        | 0.10  |     |           | -0.24 |   |        | -0.21 |    |                  | 0.061  |
| PCB 128     | -0.06                |     |     | -0.06                     |     |     | -0.05      |    |     | 0.964                                        | -0.03 |     |        | -0.01 |     |           | -0.08 |   |        | -0.12 |    |                  | 0.814  |
| PCB 137     | -0.01                |     |     | 0.02                      |     |     | -0.02      |    |     | 0.633                                        | 0.09  |     |        | -0.02 |     |           | -0.05 |   |        | -0.11 |    |                  | 0.384  |
| PCB 138/158 | -0.06                |     |     | -0.08                     |     |     | -0.03      |    |     | 0.625                                        | 0.02  |     |        | 0.03  |     |           | 0.09  |   |        | -0.21 | *  |                  | 0.166  |
| PCB 146/161 | -0.09                |     |     | -0.07                     |     |     | -0.11      |    |     | 0.673                                        | 0.11  |     |        | 0.00  |     |           | -0.03 |   |        | -0.23 | ** |                  | 0.071  |
| PCB 153     | -0.08                |     |     | -0.09                     |     |     | -0.06      |    |     | 0.777                                        | -0.01 |     |        | 0.03  |     |           | 0.18  |   |        | -0.24 | ** |                  | 0.069  |
| PCB 156     | 0.01                 |     |     | 0.00                      |     |     | 0.04       |    |     | 0.694                                        | 0.03  |     |        | 0.20  |     |           | 0.07  |   |        | -0.24 | *  |                  | 0.059  |
| PCB 157     | 0.00                 |     |     | 0.04                      |     |     | -0.07      |    |     | 0.183                                        | 0.06  |     |        | 0.05  |     |           | -0.19 |   |        | -0.15 |    |                  | 0.130  |
| PCB 167     | -0.10                |     |     | -0.09                     |     |     | -0.10      |    |     | 0.911                                        | -0.05 |     |        | 0.00  |     |           | -0.15 |   |        | -0.17 | *  |                  | 0.600  |
| PCB 170     | -0.05                |     |     | -0.08                     |     |     | 0.07       |    |     | 0.122                                        | -0.05 |     |        | 0.26  |     |           | 0.34  | * |        | -0.23 | *  |                  | 0.013  |
| PCB 172/192 | -0.07                |     |     | -0.09                     |     |     | -0.03      |    |     | 0.601                                        | -0.12 | *   |        | 0.11  |     |           | 0.17  |   |        | -0.11 |    |                  | 0.124  |
| PCB 177     | -0.12                | *   |     | -0.15                     | *   |     | -0.08      |    |     | 0.497                                        | -0.10 |     |        | -0.02 |     |           | 0.25  |   |        | -0.23 | ** |                  | 0.103  |
| PCB 180     | -0.05                |     |     | -0.07                     |     |     | 0.01       |    |     | 0.401                                        | -0.06 |     |        | 0.15  |     |           | 0.33  | * |        | -0.19 | *  |                  | 0.027  |
| PCB 182/187 | -0.08                |     |     | -0.18                     |     |     | -0.03      |    |     | 0.200                                        | -0.04 |     |        | 0.11  |     |           | -0.06 |   |        | -0.13 |    |                  | 0.733  |
| PCB 183     | -0.09                |     |     | -0.14                     | *   |     | -0.01      |    |     | 0.188                                        | -0.07 |     |        | 0.08  |     |           | 0.00  |   |        | -0.15 |    |                  | 0.614  |
| PCB 194     | -0.07                |     |     | -0.07                     |     |     | -0.06      |    |     | 0.969                                        | -0.08 |     |        | 0.12  |     |           | 0.29  |   |        | -0.13 |    |                  | 0.210  |
| PCB 195     | -0.05                |     |     | -0.08                     |     |     | 0.06       |    |     | 0.158                                        | -0.08 |     |        | 0.17  |     |           | 0.39  |   |        | -0.09 |    |                  | 0.110  |
| PCB 196/203 | -0.12                | **  |     | -0.10                     | *   |     | -0.15      |    |     | 0.601                                        | -0.13 | *   |        | -0.07 |     |           | 0.11  |   |        | -0.13 |    |                  | 0.753  |
| PCB 199     | -0.11                | *   |     | -0.09                     |     |     | -0.15      | *  |     | 0.460                                        | -0.13 | *   |        | -0.02 |     |           | 0.04  |   |        | -0.12 |    |                  | 0.778  |
| PCB 202     | -0.08                |     |     | 0.00                      |     |     | -0.13      |    |     | 0.216                                        | -0.10 |     |        | -0.05 |     |           | 0.15  |   |        | -0.10 |    |                  | 0.823  |
| PCB 206     | -0.11                |     |     | -0.07                     |     |     | -0.18      | *  |     | 0.319                                        | -0.14 |     |        | 0.03  |     |           | 0.16  |   |        | -0.22 | *  |                  | 0.230  |
| PCB 208     | -0.15                | *   |     | -0.08                     |     |     | -0.23      | ** |     | 0.198                                        | -0.18 |     |        | -0.07 |     |           | 0.16  |   |        | -0.23 | *  |                  | 0.309  |
| PCB 209     | -0.05                |     |     | 0.25                      | *   |     | -0.23      | ** |     | <0.001                                       | -0.11 |     |        | -0.04 |     |           | 0.36  | * |        | -0.19 |    |                  | 0.037  |
| NMeFOSAA    | -0.06                |     |     | 0.08                      |     |     | -0.19      | ** |     | 0.002                                        | -0.10 |     |        | -0.04 |     |           | -0.10 |   |        | 0.01  |    |                  | 0.801  |
| PFDA        | 0.19                 | *** | **  | 0.25                      | *** | **  | 0.15       | *  |     | 0.219                                        | 0.39  | *** | ***    | 0.24  | **  |           | 0.16  |   |        | -0.09 |    |                  | <0.001 |
| PFDoDA      | 0.05                 |     |     | 0.19                      | *   |     | 0.00       |    |     | 0.029                                        | 0.15  |     |        | 0.13  |     |           | 0.01  |   |        | -0.06 |    |                  | 0.318  |
| PFDS        | 0.05                 |     |     | 0.10                      |     |     | -0.02      |    |     | 0.133                                        | -0.16 |     |        | 0.08  |     |           | 0.12  |   |        | 0.07  |    |                  | 0.304  |
| PFHpA       | 0.09                 | *   |     | 0.01                      |     |     | 0.16       | ** |     | 0.064                                        | 0.16  | *   |        | 0.20  | *   |           | -0.04 |   |        | 0.06  |    |                  | 0.127  |
| PFHxS       | 0.14                 | *** |     | 0.17                      | **  |     | 0.12       |    |     | 0.484                                        | 0.18  | **  |        | 0.04  |     |           | 0.17  |   |        | 0.23  |    |                  | 0.435  |
| PFNA        | 0.12                 | **  |     | 0.07                      |     |     | 0.17       | ** |     | 0.226                                        | 0.31  | *** | *      | 0.21  | **  |           | 0.02  |   |        | -0.14 |    |                  | <0.001 |
| PFOA        | 0.11                 | *   |     | 0.04                      |     |     | 0.17       | ** |     | 0.092                                        | 0.12  |     |        | 0.32  | *** |           | 0.08  |   |        | -0.10 |    |                  | 0.024  |
| PFOS        | 0.14                 | **  |     | 0.20                      | **  | *   | 0.07       |    |     | 0.119                                        | 0.34  | *** | **     | 0.18  | *   |           | 0.14  |   |        | -0.14 |    |                  | 0.002  |
| PFOSA       | 0.07                 |     |     | 0.18                      | *** | *   | -0.11      |    |     | <0.001                                       | 0.12  |     |        | -0.02 |     |           | 0.10  |   |        | 0.08  |    |                  | 0.650  |
| PFUnDA      | 0.10                 | *   |     | 0.14                      | *   |     | 0.06       |    |     | 0.294                                        | 0.36  | **  |        | 0.13  |     |           | 0.09  |   |        | -0.05 |    |                  | 0.030  |

P-values: \*\*\*<0.001 ; \*\*0.001-0.01 ; \*<0.01-0.05 ; . 0.05-0.1

FDR: p-values after false discovery rate correction (\*\*\*<0.001 ; \*\*0.001-0.01 ; \*<0.01-0.05 ; . 0.05-0.1)

P<sub>int</sub>: p-values of interaction

Adjusted for maternal race/ethnicity (White, Black, Hispanic, Asian), maternal age (years, continuous), pre-pregnancy BMI (kg/m<sup>2</sup>, continuous), parity (0,1,2, 3 or more), highest level of education (Less than high school, High school diploma or GED or equivalent, Some college or Associate degree, Bachelors degree, Masters degree or Advanced degree), marital status (not married vs. living as married), infant sex (male, female), gestational age at the time of ultrasound (continuous), total serum lipids (except for PFASs, ng/mL, continuous) and log transformed plasma cotinine level (log(x+1), continuous), with repeated measurements of fetal growth (random effect variable corresponding to the mother-child pair), and with a smooth function for the gestational age.

**eTable 18: Association between EDCs and longitudinal estimated fetal growth using a generalized additive mixed model, NICHD Fetal Growth Studies – Singletons (n=2,284).**

| Chemicals       | Overall<br>(n=2,284) |     |     | Interaction by infant sex |    |     |            |     |     |                  | Interaction by maternal race/ethnicity group |     |     |        |     |     |           |   |     |        |    |     |                  |
|-----------------|----------------------|-----|-----|---------------------------|----|-----|------------|-----|-----|------------------|----------------------------------------------|-----|-----|--------|-----|-----|-----------|---|-----|--------|----|-----|------------------|
|                 | beta                 | p   | FDR | Boys Only                 |    |     | Girls Only |     |     |                  | Whites                                       |     |     | Blacks |     |     | Hispanics |   |     | Asians |    |     | P <sub>int</sub> |
|                 |                      |     |     | beta                      | p  | FDR | beta       | p   | FDR | P <sub>int</sub> | beta                                         | p   | FDR | beta   | p   | FDR | beta      | p | FDR | beta   | p  | FDR |                  |
| β-HCH           | -0.38                |     |     | -1.20                     |    |     | 0.24       |     |     | 0.716            | 4.75                                         |     |     | 76.53  | *   |     | 7.51      |   |     | -1.06  |    |     | 0.113            |
| γ-HCH           | -1.65                |     |     | 0.63                      |    |     | -22.04     | **  |     | 0.005            | 288.95                                       |     |     | -41.96 |     |     | -92.40    |   |     | -1.46  |    |     | 0.228            |
| HCB             | 1.15                 |     |     | 1.14                      |    |     | -0.36      |     |     | 0.940            | 31.95                                        |     |     | -36.61 |     |     | -6.91     |   |     | 1.39   |    |     | 0.481            |
| Oxychlorodane   | -0.30                |     |     | -21.32                    |    |     | -0.17      |     |     | 0.466            | -34.89                                       |     |     | -76.48 | .   |     | -64.28    |   |     | 0.55   |    |     | 0.129            |
| Trans-chlordane | 1.53                 |     |     | 1.59                      |    |     | 1.13       |     |     | 0.953            | 74.97                                        |     |     | 41.39  |     |     | -3.41     |   |     | 1.40   |    |     | 0.912            |
| Trans-nonachlor | 0.98                 |     |     | 1.40                      |    |     | 0.83       |     |     | 0.960            | -5.05                                        |     |     | -14.44 |     |     | 12.28     |   |     | 1.46   |    |     | 0.589            |
| p,p'-DDE        | -3.44                |     |     | -5.35                     |    |     | -1.48      |     |     | 0.378            | -73.09                                       | *** | *** | -4.95  |     |     | 3.10      |   |     | -2.72  |    |     | <0.001           |
| o,p'-DDD        | -1.68                |     |     | 1.71                      |    |     | -3.71      |     |     | 0.207            | 3.62                                         |     |     | -9.18  | *   |     | 9.21      | * |     | -2.71  |    |     | 0.022            |
| p,p'-DDD        | 4.26                 | .   |     | 8.63                      | *  |     | 0.65       |     |     | 0.096            | -9.48                                        |     |     | 5.47   |     |     | 7.91      |   |     | 4.34   |    |     | 0.535            |
| p,p'-DDT        | 2.24                 |     |     | 0.43                      |    |     | 4.64       |     |     | 0.336            | -36.36                                       |     |     | 6.02   |     |     | 4.43      |   |     | -1.77  |    |     | 0.332            |
| Mirex           | -1.96                |     |     | -3.73                     |    |     | -0.06      |     |     | 0.412            | 4.51                                         |     |     | 2.97   |     |     | -2.22     |   |     | -4.50  |    |     | 0.755            |
| PBB 153         | 2.27                 |     |     | 4.64                      | .  |     | -3.87      |     |     | 0.058            | 1.28                                         |     |     | -1.15  |     |     | 4.95      |   |     | 2.44   |    |     | 0.932            |
| PBDE 28         | -4.33                | *   |     | -2.55                     |    |     | -15.31     | **  |     | 0.029            | -65.61                                       | *** | *** | -4.16  |     |     | 1.70      |   |     | -1.78  |    |     | <0.001           |
| PBDE 47         | -6.17                | **  |     | 2.28                      |    |     | -14.01     | *** | **  | <0.001           | -16.86                                       | *** | **  | -1.78  |     |     | 0.59      |   |     | -5.23  |    |     | 0.018            |
| PBDE 85         | -3.65                | .   |     | -1.29                     |    |     | -8.35      | *   |     | 0.097            | -8.82                                        | **  |     | 11.24  | *   |     | -1.80     |   |     | -17.89 | *  |     | 0.002            |
| PBDE 99         | -2.50                |     |     | -0.16                     |    |     | -7.37      | *   |     | 0.109            | -9.61                                        | *   |     | 0.05   |     |     | 1.21      |   |     | -6.18  |    |     | 0.269            |
| PBDE 100        | -7.35                | *** | .   | -3.83                     |    |     | -11.54     | *** | *   | 0.063            | -23.11                                       | *** | *** | -7.13  | .   |     | 2.95      |   |     | -6.00  |    |     | <0.001           |
| PBDE 153        | -2.47                |     |     | 1.53                      |    |     | -6.41      | *   |     | 0.072            | -8.28                                        | **  |     | -0.21  |     |     | 15.47     | * |     | 4.35   |    |     | 0.013            |
| PBDE 154        | -8.38                | *** | *   | -7.74                     | ** |     | -9.17      | **  |     | 0.723            | -16.07                                       | *** | **  | -6.89  |     |     | -2.97     |   |     | -6.75  |    |     | 0.086            |
| PBDE 183        | -1.13                |     |     | -2.59                     |    |     | 1.97       |     |     | 0.311            | -2.36                                        |     |     | 14.11  |     |     | -2.36     |   |     | -2.36  |    |     | 0.036            |
| PBDE 209        | -3.48                | .   |     | -1.66                     |    |     | -5.79      | .   |     | 0.326            | -1.66                                        |     |     | -5.79  |     |     | -1.66     |   |     | -1.66  |    |     | 0.152            |
| PCB 5/8         | 0.41                 |     |     | 0.80                      |    |     | -0.05      |     |     | 0.890            | -14.52                                       |     |     | 11.59  |     |     | -2.78     |   |     | 3.16   |    |     | 0.221            |
| PCB 18/17       | 4.07                 | *   |     | 3.88                      | *  |     | 40.53      | .   |     | 0.117            | 3.83                                         | *   |     | 143.75 | *** | *   | -34.71    |   |     | 113.68 |    |     | <0.001           |
| PCB 22          | 2.16                 |     |     | 0.89                      |    |     | 4.56       |     |     | 0.435            | 2.44                                         |     |     | 17.71  | **  |     | -2.32     |   |     | 13.80  | .  |     | 0.009            |
| PCB 31/28       | 2.41                 |     |     | 2.34                      |    |     | 2.77       |     |     | 0.918            | -8.99                                        |     |     | 13.71  | *   |     | -2.72     |   |     | 15.26  | ** |     | 0.002            |
| PCB 33/20       | 1.52                 |     |     | 0.15                      |    |     | 4.06       |     |     | 0.409            | -1.10                                        |     |     | 18.28  | **  |     | -2.48     |   |     | 9.18   |    |     | 0.014            |
| PCB 37          | 2.94                 |     |     | 1.92                      |    |     | 4.52       |     |     | 0.571            | 3.97                                         |     |     | 18.09  | **  |     | -2.08     |   |     | 11.95  | .  |     | 0.008            |
| PCB 41/64       | 4.40                 |     |     | 10.82                     | *  |     | 1.25       |     |     | 0.100            | 5.99                                         |     |     | 11.83  | *   |     | -7.56     |   |     | 3.36   |    |     | 0.114            |
| PCB 44          | 3.29                 |     |     | 9.68                      | *  |     | 0.21       |     |     | 0.105            | 5.17                                         |     |     | 9.45   | .   |     | -9.17     |   |     | 3.78   |    |     | 0.120            |
| PCB 47/48/75    | 2.27                 |     |     | 7.45                      |    |     | 0.02       |     |     | 0.204            | 4.89                                         |     |     | 7.73   | .   |     | -13.19    | * |     | 3.69   |    |     | 0.044            |
| PCB 49/43       | 2.97                 |     |     | 7.37                      | .  |     | 0.59       |     |     | 0.227            | 3.79                                         |     |     | 9.26   | *   |     | -8.35     |   |     | 3.55   |    |     | 0.113            |
| PCB 52/73       | 1.73                 |     |     | 7.92                      |    |     | 0.28       |     |     | 0.341            | -1.40                                        |     |     | 7.41   |     |     | -8.94     |   |     | 2.26   |    |     | 0.506            |
| PCB 66/80       | 4.37                 | .   |     | 9.52                      | ** |     | -0.11      |     |     | 0.055            | 2.95                                         |     |     | 10.99  | *   |     | -5.09     |   |     | 5.77   |    |     | 0.102            |
| PCB 70/76       | 4.40                 | .   |     | 8.30                      | *  |     | 1.28       |     |     | 0.177            | 4.11                                         |     |     | 12.21  | **  |     | -3.78     |   |     | 4.50   |    |     | 0.099            |
| PCB 74/61       | 0.63                 |     |     | 3.83                      |    |     | -3.60      |     |     | 0.122            | -3.80                                        |     |     | 0.73   |     |     | -10.65    |   |     | 6.39   | .  |     | 0.086            |
| PCB 90/101/89   | 3.04                 |     |     | 13.62                     | *  |     | 0.15       |     |     | 0.064            | 11.47                                        |     |     | 10.85  | .   |     | -11.12    |   |     | 1.99   |    |     | 0.207            |
| PCB 93/95       | 1.85                 |     |     | 31.91                     | *  |     | 0.43       |     |     | 0.055            | 29.03                                        |     |     | 30.98  | .   |     | -34.80    |   |     | 1.08   |    |     | 0.104            |
| PCB 99          | 1.77                 |     |     | 7.90                      |    |     | 0.11       |     |     | 0.289            | 9.66                                         |     |     | 3.64   |     |     | -11.63    |   |     | 0.90   |    |     | 0.469            |
| PCB 85/120      | 6.20                 | *   |     | 12.30                     | ** |     | 2.37       |     |     | 0.069            | 12.41                                        | .   |     | 7.21   |     |     | 4.90      |   |     | 3.32   |    |     | 0.721            |
| PCB 110         | 3.85                 |     |     | 12.75                     | *  |     | 0.37       |     |     | 0.054            | 8.34                                         |     |     | 10.49  | .   |     | -5.24     |   |     | 2.16   |    |     | 0.392            |



| Chemicals   | Overall<br>(n=2,284) |     |     | Interaction by infant sex |   |     |            |     |     |                  | Interaction by maternal race/ethnicity group |     |     |        |   |     |           |    |     |        |   |     |                  |
|-------------|----------------------|-----|-----|---------------------------|---|-----|------------|-----|-----|------------------|----------------------------------------------|-----|-----|--------|---|-----|-----------|----|-----|--------|---|-----|------------------|
|             | beta                 | p   | FDR | Boys Only                 |   |     | Girls Only |     |     |                  | Whites                                       |     |     | Blacks |   |     | Hispanics |    |     | Asians |   |     | P <sub>int</sub> |
|             |                      |     |     | beta                      | p | FDR | beta       | p   | FDR | P <sub>int</sub> | beta                                         | p   | FDR | beta   | p | FDR | beta      | p  | FDR | beta   | p | FDR |                  |
| PCB 118/106 | 0.41                 |     |     | 5.67                      |   |     | -3.00      |     |     | 0.101            | 5.58                                         |     |     | 1.51   |   |     | -17.68    | *  |     | 0.74   |   |     | 0.059            |
| PCB 105/127 | 0.84                 |     |     | 6.28                      |   |     | -2.51      |     |     | 0.100            | 5.92                                         |     |     | 2.00   |   |     | -15.15    | *  |     | 0.99   |   |     | 0.104            |
| PCB 114/122 | 3.73                 |     |     | 8.61                      | * |     | 0.82       |     |     | 0.091            | 2.79                                         |     |     | 4.71   |   |     | -7.69     |    |     | 13.97  | * |     | 0.179            |
| PCB 128     | -3.17                |     |     | -2.61                     |   |     | -3.80      |     |     | 0.827            | 0.08                                         |     |     | -1.39  |   |     | -9.62     | *  |     | -2.94  |   |     | 0.461            |
| PCB 137     | -1.72                |     |     | 1.43                      |   |     | -3.73      |     |     | 0.330            | 0.18                                         |     |     | -0.33  |   |     | -15.70    | *  |     | 0.02   |   |     | 0.253            |
| PCB 138/158 | -2.55                |     |     | -2.54                     |   |     | -2.70      |     |     | 0.993            | -1.58                                        |     |     | -4.15  |   |     | -10.41    |    |     | -1.30  |   |     | 0.750            |
| PCB 146/161 | -2.56                |     |     | -3.94                     |   |     | -1.59      |     |     | 0.627            | -1.13                                        |     |     | 3.40   |   |     | -10.40    |    |     | -2.99  |   |     | 0.503            |
| PCB 153     | -2.13                |     |     | -2.21                     |   |     | -2.24      |     |     | 0.973            | -3.67                                        |     |     | 0.25   |   |     | -3.76     |    |     | -1.55  |   |     | 0.950            |
| PCB 156     | 3.20                 |     |     | 5.56                      | . |     | -0.57      |     |     | 0.174            | 1.98                                         |     |     | -2.31  |   |     | 9.12      |    |     | 7.20   |   |     | 0.553            |
| PCB 157     | -0.62                |     |     | 5.17                      | . |     | -9.69      | **  |     | <0.001           | 2.28                                         |     |     | -10.56 |   |     | -6.93     |    |     | 0.86   |   |     | 0.239            |
| PCB 167     | -3.88                |     |     | -2.64                     |   |     | -5.19      |     |     | 0.620            | 0.10                                         |     |     | -6.51  |   |     | -21.63    | ** |     | -1.13  |   |     | 0.043            |
| PCB 170     | 0.40                 |     |     | -1.33                     |   |     | 5.12       |     |     | 0.179            | -1.81                                        |     |     | 3.37   |   |     | 12.61     |    |     | 3.51   |   |     | 0.394            |
| PCB 172/192 | -0.43                |     |     | -2.29                     |   |     | 2.61       |     |     | 0.306            | -3.25                                        |     |     | 11.96  |   |     | -6.61     |    |     | 2.05   |   |     | 0.222            |
| PCB 177     | -1.11                |     |     | -4.24                     |   |     | 1.96       |     |     | 0.213            | -1.48                                        |     |     | 7.60   |   |     | -1.55     |    |     | -2.74  |   |     | 0.738            |
| PCB 180     | 0.44                 |     |     | -0.81                     |   |     | 3.05       |     |     | 0.400            | -1.95                                        |     |     | 5.78   |   |     | 8.10      |    |     | 2.62   |   |     | 0.580            |
| PCB 182/187 | 0.86                 |     |     | -0.74                     |   |     | 1.31       |     |     | 0.727            | 0.76                                         |     |     | 14.95  |   |     | -16.20    |    |     | -0.05  |   |     | 0.344            |
| PCB 183     | -0.25                |     |     | -2.02                     |   |     | 1.29       |     |     | 0.501            | -1.51                                        |     |     | 11.56  |   |     | -12.26    |    |     | -0.11  |   |     | 0.318            |
| PCB 194     | 0.83                 |     |     | -0.02                     |   |     | 4.09       |     |     | 0.418            | -1.04                                        |     |     | 2.64   |   |     | 19.65     | .  |     | 4.66   |   |     | 0.264            |
| PCB 195     | 1.13                 |     |     | -0.86                     |   |     | 5.92       |     |     | 0.171            | -1.66                                        |     |     | 4.71   |   |     | 25.35     | *  |     | 3.44   |   |     | 0.097            |
| PCB 196/203 | -1.41                |     |     | -1.39                     |   |     | -1.69      |     |     | 0.983            | -3.39                                        |     |     | -1.03  |   |     | 12.90     |    |     | 0.86   |   |     | 0.538            |
| PCB 199     | -1.07                |     |     | -0.92                     |   |     | -1.56      |     |     | 0.921            | -2.43                                        |     |     | 0.41   |   |     | -2.28     |    |     | 0.43   |   |     | 0.939            |
| PCB 202     | -0.37                |     |     | 1.47                      |   |     | -1.60      |     |     | 0.611            | 1.80                                         |     |     | 3.28   |   |     | -13.87    |    |     | -1.09  |   |     | 0.655            |
| PCB 206     | -0.76                |     |     | -1.39                     |   |     | -0.21      |     |     | 0.824            | -4.61                                        |     |     | 9.08   |   |     | 10.15     |    |     | -3.63  |   |     | 0.246            |
| PCB 208     | -4.86                |     |     | -5.13                     |   |     | -4.86      |     |     | 0.948            | -8.98                                        |     |     | -4.55  |   |     | 5.20      |    |     | -5.26  |   |     | 0.715            |
| PCB 209     | 2.31                 |     |     | 9.79                      | . |     | -3.29      |     |     | 0.056            | 0.63                                         |     |     | -1.78  |   |     | 22.41     | ** |     | -3.65  |   |     | 0.060            |
| NMeFOSAA    | 1.87                 |     |     | 4.70                      |   |     | -0.73      |     |     | 0.243            | 3.18                                         |     |     | 5.75   |   |     | -6.54     |    |     | 5.02   |   |     | 0.206            |
| PFDA        | 6.11                 | **  |     | 6.01                      | . |     | 5.99       | .   |     | 0.995            | 18.58                                        | *** | **  | 5.47   |   |     | -0.54     |    |     | -2.23  |   |     | 0.006            |
| PFDoDA      | 2.84                 |     |     | 6.98                      | . |     | 1.41       |     |     | 0.238            | 28.70                                        | *** | *** | 9.95   | * |     | -3.92     |    |     | -5.68  |   |     | <0.001           |
| PFDS        | -2.88                |     |     | -3.66                     |   |     | -2.11      |     |     | 0.720            | -1.35                                        |     |     | -1.73  |   |     | -14.47    | .  |     | -2.19  |   |     | 0.533            |
| PFHpA       | 8.13                 | *** | *   | 3.79                      |   |     | 12.18      | *** | **  | 0.047            | 15.12                                        | *** | **  | 12.21  | * |     | 2.46      |    |     | 0.39   |   |     | 0.030            |
| PFHxS       | 2.30                 |     |     | -0.46                     |   |     | 5.05       |     |     | 0.204            | 4.09                                         |     |     | -10.25 | * |     | 14.96     | ** |     | 8.06   |   |     | 0.002            |
| PFNA        | 3.27                 |     |     | 0.99                      |   |     | 5.37       | .   |     | 0.306            | 14.30                                        | **  | .   | 1.63   |   |     | -1.78     |    |     | -0.68  |   |     | 0.040            |
| PFOA        | 2.59                 |     |     | -3.14                     |   |     | 7.81       | *   |     | 0.011            | 5.86                                         |     |     | 5.86   |   |     | -0.46     |    |     | -3.10  |   |     | 0.400            |
| PFOS        | 3.82                 |     |     | 5.80                      | . |     | 1.72       |     |     | 0.349            | 3.31                                         |     |     | 3.18   |   |     | 6.83      |    |     | 2.55   |   |     | 0.944            |
| PFOSA       | -5.69                | *   |     | -0.84                     |   |     | -13.39     | *** | *   | 0.005            | -18.83                                       | *** | **  | -8.82  | * |     | -7.12     |    |     | 5.59   |   |     | <0.001           |
| PFUnDA      | 1.47                 |     |     | 2.57                      |   |     | 0.42       |     |     | 0.618            | 13.60                                        | *   |     | 5.06   |   |     | -10.22    |    |     | -2.38  |   |     | 0.032            |

P-values: \*\*\*<0.001 ; \*\*0.001-0.01 ; \*<0.01-0.05 ; . 0.05-0.1

FDR: p-values after false discovery rate correction (\*\*\*<0.001 ; \*\*0.001-0.01 ; \*<0.01-0.05 ; . 0.05-0.1)

P<sub>int</sub>: p-values of interaction

Adjusted for maternal race/ethnicity (White, Black, Hispanic, Asian), maternal age (years, continuous), pre-pregnancy BMI (kg/m<sup>2</sup>, continuous), parity (0,1,2, 3 or more), highest level of education (Less than high school, High school diploma or GED or equivalent, Some college or Associate degree, Bachelors degree, Masters degree or Advanced degree), marital status (not married vs. living as married), infant sex (male, female), gestational age at the time of ultrasound (continuous), total serum lipids (except for PFASs, ng/mL, continuous) and log transformed plasma cotinine level (log(x+1), continuous), with repeated measurements of fetal growth (random effect variable corresponding to the mother-child pair), and with a smooth function for the gestational age.

**eTable 19: Association between EDCs and longitudinal cerebral width using a generalized additive mixed model, NICHD Fetal Growth Studies – Singletons (n=2,284).**

|                 | Overall   |     |     | Interaction by infant sex |     |     |            |     |     | Interaction by maternal race/ethnicity group |        |     |     |        |   |     |           |    |     |        |    |     |                  |
|-----------------|-----------|-----|-----|---------------------------|-----|-----|------------|-----|-----|----------------------------------------------|--------|-----|-----|--------|---|-----|-----------|----|-----|--------|----|-----|------------------|
|                 | (n=2,284) |     |     | Boys Only                 |     |     | Girls Only |     |     | P <sub>int</sub>                             | Whites |     |     | Blacks |   |     | Hispanics |    |     | Asians |    |     | P <sub>int</sub> |
|                 | beta      | p   | FDR | beta                      | p   | FDR | beta       | p   | FDR |                                              | beta   | p   | FDR | beta   | p | FDR | beta      | p  | FDR | beta   | p  | FDR |                  |
| β-HCH           | 0.03      |     |     | -0.02                     |     |     | 0.08       | *   |     | 0.057                                        | 0.13   |     |     | 0.21   |   |     | -0.34     | .  |     | 0.04   |    |     | 0.185            |
| γ-HCH           | 0.00      |     |     | -0.01                     |     |     | 0.06       |     |     | 0.491                                        | 0.22   |     |     | 0.20   |   |     | -0.45     |    |     | 0.00   |    |     | 0.948            |
| HCB             | -0.01     |     |     | -0.01                     |     |     | 0.36       | .   |     | 0.077                                        | 0.79   |     |     | 0.46   |   |     | 0.49      | *  |     | -0.02  |    |     | 0.024            |
| Oxychlorodane   | -0.01     |     |     | -0.16                     |     |     | -0.01      |     |     | 0.602                                        | -0.30  |     |     | -1.05  | * |     | -0.08     |    |     | 0.00   |    |     | 0.083            |
| Trans-chlordane | -0.02     |     |     | -0.03                     |     |     | 0.01       |     |     | 0.560                                        | 0.29   |     |     | 1.45   | . |     | 1.15      |    |     | -0.02  |    |     | 0.204            |
| Trans-nonachlor | 0.02      |     |     | -0.05                     |     |     | 0.02       |     |     | 0.550                                        | -0.02  |     |     | 0.20   |   |     | -0.17     |    |     | 0.01   |    |     | 0.441            |
| p,p'-DDE        | -0.06     | *   |     | -0.10                     | **  | *   | -0.01      |     |     | 0.079                                        | -0.29  | *   |     | -0.15  |   |     | -0.07     | .  |     | 0.02   |    |     | 0.055            |
| o,p'-DDD        | 0.01      |     |     | 0.03                      |     |     | -0.01      |     |     | 0.444                                        | -0.11  |     |     | -0.02  |   |     | 0.05      |    |     | 0.01   |    |     | 0.569            |
| p,p'-DDD        | 0.02      |     |     | 0.02                      |     |     | 0.02       |     |     | 0.908                                        | -0.24  | *   |     | -0.04  |   |     | 0.13      | .  |     | 0.03   |    |     | 0.029            |
| p,p'-DDT        | 0.04      | .   |     | 0.02                      |     |     | 0.08       | *   |     | 0.158                                        | 0.19   |     |     | -0.21  |   |     | 0.04      |    |     | 0.08   | .  |     | 0.413            |
| Mirex           | -0.01     |     |     | -0.02                     |     |     | -0.01      |     |     | 0.888                                        | 0.01   |     |     | 0.07   |   |     | -0.02     |    |     | -0.02  |    |     | 0.926            |
| PBB 153         | 0.07      | **  |     | 0.07                      | **  | *   | 0.05       |     |     | 0.553                                        | 0.04   |     |     | 0.06   |   |     | 0.13      | *  |     | 0.07   | *  |     | 0.635            |
| PBDE 28         | -0.02     |     |     | -0.01                     |     |     | -0.11      | .   |     | 0.087                                        | -0.43  | *** | .   | 0.02   |   |     | -0.06     |    |     | 0.01   |    |     | <0.001           |
| PBDE 47         | -0.06     | *   |     | 0.00                      |     |     | -0.11      | *** |     | 0.019                                        | -0.09  | .   |     | 0.06   |   |     | -0.11     | *  |     | -0.10  | *  |     | 0.066            |
| PBDE 85         | -0.08     | *** |     | -0.07                     | *   | .   | -0.10      | **  |     | 0.450                                        | -0.08  | *   |     | 0.03   |   |     | -0.09     | *  |     | -0.23  | ** |     | 0.061            |
| PBDE 99         | -0.05     | *   |     | -0.04                     |     |     | -0.09      | *   |     | 0.388                                        | -0.10  | *   |     | 0.00   |   |     | -0.07     |    |     | -0.16  | ** |     | 0.088            |
| PBDE 100        | -0.04     | .   |     | -0.02                     |     |     | -0.06      | .   |     | 0.419                                        | -0.12  | *   |     | 0.05   |   |     | -0.03     |    |     | -0.18  | ** |     | 0.004            |
| PBDE 153        | -0.01     |     |     | 0.03                      |     |     | -0.04      |     |     | 0.140                                        | 0.03   |     |     | 0.02   |   |     | -0.15     | .  |     | -0.13  |    |     | 0.085            |
| PBDE 154        | -0.04     | .   |     | -0.02                     |     |     | -0.08      | *   |     | 0.200                                        | -0.02  |     |     | -0.08  |   |     | -0.01     |    |     | -0.14  | *  |     | 0.280            |
| PBDE 183        | 0.03      |     |     | 0.03                      |     |     | 0.04       |     |     | 0.843                                        | 0.03   |     |     | 0.07   |   |     | 0.03      |    |     | 0.03   |    |     | 0.587            |
| PBDE 209        | -0.02     |     |     | -0.02                     |     |     | -0.03      |     |     | 0.793                                        | -0.02  |     |     | -0.03  |   |     | -0.02     |    |     | -0.02  |    |     | 0.686            |
| PCB 5/8         | 0.03      |     |     | 0.11                      | *   | .   | -0.03      |     |     | 0.026                                        | 0.05   |     |     | 0.14   |   |     | 0.05      |    |     | -0.08  |    |     | 0.159            |
| PCB 18/17       | 0.05      | **  |     | 0.05                      | **  | *   | 0.33       |     |     | 0.342                                        | 0.05   | **  |     | 0.68   |   |     | 0.69      | .  |     | -2.30  | *  |     | 0.014            |
| PCB 22          | 0.04      |     |     | 0.08                      | *   | .   | -0.01      |     |     | 0.072                                        | 0.03   |     |     | 0.14   | * |     | 0.05      |    |     | -0.13  | .  |     | 0.074            |
| PCB 31/28       | 0.04      | .   |     | 0.09                      | **  | *   | -0.02      |     |     | 0.030                                        | -0.03  |     |     | 0.12   | . |     | 0.06      |    |     | 0.00   |    |     | 0.394            |
| PCB 33/20       | 0.03      |     |     | 0.08                      | *   | .   | -0.03      |     |     | 0.041                                        | 0.02   |     |     | 0.14   | * |     | 0.05      |    |     | -0.14  | .  |     | 0.036            |
| PCB 37          | 0.05      | *   |     | 0.09                      | *   | .   | 0.02       |     |     | 0.180                                        | 0.08   |     |     | 0.13   | . |     | 0.06      | .  |     | -0.08  |    |     | 0.190            |
| PCB 41/64       | 0.03      |     |     | 0.16                      | **  | *   | -0.04      |     |     | 0.003                                        | 0.05   |     |     | 0.11   | . |     | 0.10      |    |     | -0.06  |    |     | 0.110            |
| PCB 44          | 0.03      |     |     | 0.17                      | **  | *   | -0.03      |     |     | 0.003                                        | 0.03   |     |     | 0.11   | . |     | 0.12      | .  |     | -0.06  |    |     | 0.089            |
| PCB 47/48/75    | 0.02      |     |     | 0.12                      | *   | .   | -0.02      |     |     | 0.035                                        | 0.06   |     |     | 0.08   |   |     | 0.09      |    |     | -0.07  |    |     | 0.201            |
| PCB 49/43       | 0.03      |     |     | 0.15                      | **  | *   | -0.03      |     |     | 0.005                                        | 0.03   |     |     | 0.10   | . |     | 0.11      | .  |     | -0.07  |    |     | 0.062            |
| PCB 52/73       | 0.02      |     |     | 0.21                      | *   | .   | -0.03      |     |     | 0.013                                        | -0.07  |     |     | 0.13   |   |     | 0.17      | .  |     | -0.04  |    |     | 0.125            |
| PCB 66/80       | 0.04      |     |     | 0.11                      | *   | .   | -0.01      |     |     | 0.040                                        | 0.05   |     |     | 0.10   | . |     | 0.09      |    |     | -0.04  |    |     | 0.241            |
| PCB 70/76       | 0.05      | .   |     | 0.14                      | **  | *   | -0.02      |     |     | 0.008                                        | 0.09   |     |     | 0.12   | * |     | 0.08      |    |     | -0.07  |    |     | 0.101            |
| PCB 74/61       | 0.01      |     |     | 0.02                      |     |     | 0.01       |     |     | 0.763                                        | -0.07  |     |     | 0.00   |   |     | 0.11      |    |     | 0.04   |    |     | 0.189            |
| PCB 90/101/89   | 0.04      |     |     | 0.20                      | **  | *   | -0.02      |     |     | 0.009                                        | 0.14   |     |     | 0.14   | . |     | 0.16      |    |     | -0.04  |    |     | 0.116            |
| PCB 93/95       | 0.02      |     |     | 0.58                      | **  | *   | -0.02      |     |     | 0.002                                        | 0.27   |     |     | 0.38   | . |     | 0.46      | .  |     | -0.02  |    |     | 0.076            |
| PCB 99          | 0.00      |     |     | -0.01                     |     |     | 0.00       |     |     | 0.869                                        | 0.00   |     |     | 0.03   |   |     | 0.29      | *  |     | -0.05  |    |     | 0.121            |
| PCB 85/120      | 0.07      | *   |     | 0.16                      | *** | *   | 0.00       |     |     | 0.011                                        | 0.16   | *   |     | 0.10   | . |     | 0.23      | ** |     | -0.06  |    |     | 0.011            |
| PCB 110         | 0.05      |     |     | 0.20                      | *** | *   | -0.02      |     |     | 0.004                                        | 0.14   |     |     | 0.15   | * |     | 0.18      | .  |     | -0.05  |    |     | 0.037            |

| Chemicals   | Overall<br>(n=2,284) |    |     | Interaction by infant sex |    |     |            |   |     |                  | Interaction by maternal race/ethnicity group |    |     |        |     |     |           |     |     |        |    |     |                  |
|-------------|----------------------|----|-----|---------------------------|----|-----|------------|---|-----|------------------|----------------------------------------------|----|-----|--------|-----|-----|-----------|-----|-----|--------|----|-----|------------------|
|             | beta                 | p  | FDR | Boys Only                 |    |     | Girls Only |   |     |                  | Whites                                       |    |     | Blacks |     |     | Hispanics |     |     | Asians |    |     | P <sub>int</sub> |
|             |                      |    |     | beta                      | p  | FDR | beta       | p | FDR | P <sub>int</sub> | beta                                         | p  | FDR | beta   | p   | FDR | beta      | p   | FDR | beta   | p  | FDR |                  |
| PCB 118/106 | -0.03                |    |     | -0.07                     |    |     | -0.01      |   |     | 0.218            | -0.02                                        |    |     | -0.03  |     |     | 0.04      |     |     | -0.08  |    |     | 0.708            |
| PCB 105/127 | -0.01                |    |     | -0.05                     |    |     | 0.01       |   |     | 0.310            | -0.01                                        |    |     | 0.00   |     |     | 0.09      |     |     | -0.06  |    |     | 0.548            |
| PCB 114/122 | -0.04                |    |     | -0.07                     | .  |     | -0.02      |   |     | 0.279            | -0.02                                        |    |     | -0.08  | .   |     | 0.01      |     |     | -0.01  |    |     | 0.679            |
| PCB 128     | -0.04                | .  |     | -0.07                     | *  |     | -0.01      |   |     | 0.231            | -0.05                                        |    |     | -0.06  |     |     | 0.11      | .   |     | -0.15  | ** |     | 0.007            |
| PCB 137     | -0.05                | .  |     | -0.11                     | *  | .   | -0.02      |   |     | 0.099            | -0.04                                        |    |     | -0.16  | .   |     | -0.06     |     |     | -0.03  |    |     | 0.578            |
| PCB 138/158 | -0.03                |    |     | -0.09                     | *  |     | 0.02       |   |     | 0.055            | -0.01                                        |    |     | -0.12  |     |     | 0.20      | *   |     | -0.08  | .  |     | 0.039            |
| PCB 146/161 | -0.04                |    |     | -0.05                     |    |     | -0.02      |   |     | 0.594            | -0.02                                        |    |     | -0.07  |     |     | 0.20      | *   |     | -0.11  | *  |     | 0.011            |
| PCB 153     | -0.01                |    |     | -0.02                     |    |     | 0.01       |   |     | 0.542            | 0.00                                         |    |     | -0.04  |     |     | 0.38      | *** | .   | -0.07  |    |     | 0.002            |
| PCB 156     | -0.04                |    |     | -0.05                     |    |     | -0.01      |   |     | 0.383            | -0.02                                        |    |     | -0.19  | *   |     | -0.04     |     |     | -0.02  |    |     | 0.254            |
| PCB 157     | -0.06                | *  |     | -0.07                     | *  | .   | -0.04      |   |     | 0.440            | -0.02                                        |    |     | -0.29  | *** | *   | -0.10     |     |     | -0.02  |    |     | 0.007            |
| PCB 167     | -0.08                | ** |     | -0.11                     | ** | *   | -0.05      |   |     | 0.251            | -0.02                                        |    |     | -0.34  | *** | *   | -0.05     |     |     | -0.06  |    |     | 0.006            |
| PCB 170     | 0.02                 |    |     | 0.01                      |    |     | 0.07       |   |     | 0.303            | 0.00                                         |    |     | 0.02   |     |     | 0.23      | *   |     | 0.03   |    |     | 0.153            |
| PCB 172/192 | 0.01                 |    |     | 0.01                      |    |     | 0.02       |   |     | 0.743            | 0.01                                         |    |     | -0.04  |     |     | 0.08      |     |     | 0.00   |    |     | 0.733            |
| PCB 177     | 0.02                 |    |     | 0.01                      |    |     | 0.03       |   |     | 0.700            | 0.04                                         |    |     | 0.03   |     |     | 0.34      | *** |     | -0.07  |    |     | 0.004            |
| PCB 180     | 0.04                 |    |     | 0.03                      |    |     | 0.07       |   |     | 0.414            | 0.02                                         |    |     | 0.06   |     |     | 0.23      | *   |     | 0.05   |    |     | 0.206            |
| PCB 182/187 | 0.05                 |    |     | 0.07                      |    |     | 0.03       |   |     | 0.547            | 0.09                                         |    |     | 0.15   |     |     | 0.68      | *** | *   | -0.02  |    |     | <0.001           |
| PCB 183     | 0.03                 |    |     | 0.02                      |    |     | 0.04       |   |     | 0.665            | 0.02                                         |    |     | 0.10   |     |     | 0.35      | **  |     | -0.03  |    |     | 0.021            |
| PCB 194     | 0.04                 | .  |     | 0.04                      |    |     | 0.06       |   |     | 0.707            | 0.02                                         |    |     | 0.07   |     |     | 0.25      | *   |     | 0.07   |    |     | 0.305            |
| PCB 195     | 0.03                 |    |     | 0.02                      |    |     | 0.04       |   |     | 0.679            | 0.01                                         |    |     | 0.06   |     |     | 0.23      | .   |     | 0.05   |    |     | 0.321            |
| PCB 196/203 | 0.03                 |    |     | 0.03                      |    |     | 0.01       |   |     | 0.732            | 0.02                                         |    |     | -0.01  |     |     | 0.28      | *   |     | 0.02   |    |     | 0.288            |
| PCB 199     | 0.05                 | .  |     | 0.05                      | .  |     | 0.03       |   |     | 0.712            | 0.04                                         |    |     | 0.04   |     |     | 0.27      | *   |     | 0.04   |    |     | 0.365            |
| PCB 202     | 0.04                 |    |     | 0.08                      |    |     | 0.00       |   |     | 0.239            | 0.12                                         | .  |     | 0.11   |     |     | 0.28      | .   |     | -0.03  |    |     | 0.061            |
| PCB 206     | 0.01                 |    |     | 0.03                      |    |     | -0.03      |   |     | 0.366            | 0.03                                         |    |     | -0.02  |     |     | 0.23      | .   |     | -0.06  |    |     | 0.190            |
| PCB 208     | -0.04                |    |     | -0.02                     |    |     | -0.07      |   |     | 0.460            | -0.04                                        |    |     | -0.12  |     |     | 0.25      | *   |     | -0.07  |    |     | 0.060            |
| PCB 209     | 0.04                 |    |     | 0.08                      |    |     | 0.00       |   |     | 0.268            | 0.09                                         |    |     | -0.08  |     |     | 0.31      | **  |     | -0.04  |    |     | 0.008            |
| NMeFOSAA    | -0.05                | .  |     | -0.02                     |    |     | -0.08      | * |     | 0.181            | 0.00                                         |    |     | -0.10  | *   |     | -0.12     | *   |     | 0.06   |    |     | 0.063            |
| PFDA        | 0.00                 |    |     | 0.00                      |    |     | 0.01       |   |     | 0.901            | 0.13                                         | ** |     | -0.03  |     |     | 0.00      |     |     | -0.11  | *  |     | 0.007            |
| PFDoDA      | -0.01                |    |     | -0.05                     |    |     | 0.00       |   |     | 0.442            | 0.06                                         |    |     | -0.04  |     |     | -0.01     |     |     | -0.05  |    |     | 0.591            |
| PFDS        | -0.05                | .  |     | -0.03                     |    |     | -0.07      | . |     | 0.568            | 0.14                                         | *  |     | -0.06  |     |     | -0.14     |     |     | -0.08  | *  |     | 0.025            |
| PFHpA       | -0.02                |    |     | -0.04                     |    |     | -0.01      |   |     | 0.619            | 0.04                                         |    |     | -0.08  |     |     | -0.05     |     |     | -0.06  |    |     | 0.267            |
| PFHxS       | 0.01                 |    |     | -0.06                     | .  |     | 0.08       | * |     | 0.004            | -0.01                                        |    |     | -0.01  |     |     | -0.04     |     |     | 0.16   | *  |     | 0.129            |
| PFNA        | -0.03                |    |     | -0.05                     |    |     | -0.01      |   |     | 0.455            | 0.05                                         |    |     | -0.03  |     |     | -0.03     |     |     | -0.12  | *  |     | 0.137            |
| PFOA        | 0.01                 |    |     | -0.07                     | .  |     | 0.09       | * |     | <0.001           | 0.02                                         |    |     | -0.07  |     |     | 0.02      |     |     | 0.08   |    |     | 0.278            |
| PFOS        | -0.03                |    |     | -0.02                     |    |     | -0.04      |   |     | 0.686            | 0.10                                         | .  |     | -0.03  |     |     | -0.10     |     |     | -0.11  | *  |     | 0.020            |
| PFOSA       | -0.04                |    |     | -0.01                     |    |     | -0.08      | . |     | 0.182            | 0.05                                         |    |     | -0.09  | *   |     | -0.10     | .   |     | -0.01  |    |     | 0.108            |
| PFUnDA      | -0.02                |    |     | -0.02                     |    |     | -0.03      |   |     | 0.782            | -0.04                                        |    |     | -0.01  |     |     | 0.07      |     |     | -0.06  |    |     | 0.485            |

P-values: \*\*\*<0.001 ; \*\*0.001-0.01 ; \*<0.01-0.05 ; . 0.05-0.1

FDR: p-values after false discovery rate correction (\*\*\*<0.001 ; \*\*0.001-0.01 ; \*<0.01-0.05 ; . 0.05-0.1)

P<sub>int</sub>: p-values of interaction

Adjusted for maternal race/ethnicity (White, Black, Hispanic, Asian), maternal age (years, continuous), pre-pregnancy BMI (kg/m<sup>2</sup>, continuous), parity (0,1,2, 3 or more), highest level of education (Less than high school, High school diploma or GED or equivalent, Some college or Associate degree, Bachelors degree, Masters degree or Advanced degree), marital status (not married vs. living as married), infant sex (male, female), gestational age at the time of ultrasound (continuous), total serum lipids (except for PFASs, ng/mL, continuous) and log transformed plasma cotinine level (log(x+1), continuous), with repeated measurements of fetal growth (random effect variable corresponding to the mother-child pair), and with a smooth function for the gestational age.

**eTable 20: Association between EDCs and longitudinal inner orbit diameter using a generalized additive mixed model, NICHD Fetal Growth Studies – Singletons (n=2,284).**

| Chemicals       | Overall<br>(n=2,284) |    |     | Interaction by infant sex |    |     |            |    |     |                  | Interaction by maternal race/ethnicity group |    |     |        |     |     |           |     |     |        |     |     |                  |
|-----------------|----------------------|----|-----|---------------------------|----|-----|------------|----|-----|------------------|----------------------------------------------|----|-----|--------|-----|-----|-----------|-----|-----|--------|-----|-----|------------------|
|                 | beta                 | p  | FDR | Boys Only                 |    |     | Girls Only |    |     |                  | Whites                                       |    |     | Blacks |     |     | Hispanics |     |     | Asians |     |     | P <sub>int</sub> |
|                 |                      |    |     | beta                      | p  | FDR | beta       | p  | FDR | P <sub>int</sub> | beta                                         | p  | FDR | beta   | p   | FDR | beta      | p   | FDR | beta   | p   | FDR |                  |
| β-HCH           | -0.06                | *  |     | -0.10                     | ** | .   | 0.00       |    |     | 0.030            | 0.05                                         |    |     | 0.94   | *** |     | -0.28     |     |     | -0.06  | *   |     | 0.003            |
| γ-HCH           | -0.03                |    |     | -0.03                     |    |     | -0.09      |    |     | 0.385            | 0.29                                         |    |     | 0.72   |     |     | 0.20      |     |     | -0.03  |     |     | 0.411            |
| HCB             | -0.01                |    |     | -0.01                     |    |     | -0.12      |    |     | 0.453            | -0.14                                        |    |     | 0.39   |     |     | 0.18      |     |     | -0.02  |     |     | 0.257            |
| Oxychlorane     | 0.02                 |    |     | 0.42                      |    |     | 0.02       |    |     | 0.141            | 0.75                                         | *  |     | 0.11   |     |     | -0.58     |     |     | 0.02   |     |     | 0.152            |
| Trans-chlordane | -0.01                |    |     | -0.02                     |    |     | 0.02       |    |     | 0.604            | 1.62                                         |    |     | 2.01   | **  |     | 1.70      |     |     | -0.01  |     |     | 0.008            |
| Trans-nonachlor | 0.06                 | .  |     | 0.27                      | *  |     | 0.04       |    |     | 0.039            | 0.34                                         | *  |     | 0.29   | *   |     | 0.00      |     |     | 0.03   |     |     | 0.043            |
| p,p'-DDE        | -0.06                | *  |     | -0.05                     |    |     | -0.08      | *  |     | 0.447            | -0.30                                        | ** | .   | 0.15   | .   |     | -0.09     | *   |     | -0.04  |     |     | 0.003            |
| o,p'-DDD        | -0.06                | ** |     | -0.03                     |    |     | -0.07      | ** |     | 0.269            | -0.07                                        |    |     | -0.02  |     |     | 0.06      |     |     | -0.13  | *** | *** | <0.001           |
| p,p'-DDD        | -0.02                |    |     | 0.00                      |    |     | -0.04      |    |     | 0.429            | -0.05                                        |    |     | 0.03   |     |     | 0.12      | .   |     | -0.05  | .   |     | 0.122            |
| p,p'-DDT        | -0.05                | *  |     | -0.03                     |    |     | -0.07      | *  |     | 0.461            | -0.17                                        |    |     | 0.37   | *   |     | -0.04     |     |     | -0.08  | *   |     | 0.024            |
| Mirex           | -0.03                |    |     | -0.02                     |    |     | -0.07      | .  |     | 0.290            | 0.02                                         |    |     | 0.09   |     |     | -0.02     |     |     | -0.09  | *   |     | 0.236            |
| PBB 153         | 0.02                 |    |     | 0.01                      |    |     | 0.06       | .  |     | 0.210            | 0.05                                         |    |     | -0.14  |     |     | -0.01     |     |     | 0.03   |     |     | 0.231            |
| PBDE 28         | 0.01                 |    |     | 0.02                      |    |     | -0.04      |    |     | 0.291            | -0.17                                        | .  |     | 0.02   |     |     | -0.01     |     |     | 0.06   |     |     | 0.181            |
| PBDE 47         | 0.03                 |    |     | 0.09                      | ** | .   | -0.02      |    |     | 0.007            | -0.03                                        |    |     | 0.02   |     |     | 0.12      | **  |     | 0.02   |     |     | 0.086            |
| PBDE 85         | 0.02                 |    |     | 0.03                      |    |     | 0.00       |    |     | 0.352            | -0.05                                        |    |     | 0.12   | *   |     | 0.07      | *   |     | -0.15  | *   |     | <0.001           |
| PBDE 99         | 0.04                 | .  |     | 0.04                      |    |     | 0.04       |    |     | 0.988            | 0.00                                         |    |     | 0.02   |     |     | 0.17      | *** | *   | -0.06  |     |     | 0.005            |
| PBDE 100        | 0.00                 |    |     | 0.02                      |    |     | -0.02      |    |     | 0.218            | -0.09                                        | *  |     | -0.01  |     |     | 0.08      | *   |     | -0.02  |     |     | 0.012            |
| PBDE 153        | 0.00                 |    |     | 0.01                      |    |     | -0.01      |    |     | 0.570            | -0.03                                        |    |     | -0.01  |     |     | 0.12      | .   |     | 0.03   |     |     | 0.208            |
| PBDE 154        | -0.02                |    |     | -0.04                     |    |     | 0.00       |    |     | 0.324            | -0.05                                        |    |     | -0.02  |     |     | 0.04      |     |     | -0.11  | *   |     | 0.063            |
| PBDE 183        | -0.06                | ** |     | -0.04                     | .  |     | -0.08      | *  |     | 0.424            | -0.06                                        |    |     | -0.05  |     |     | -0.06     |     |     | -0.06  |     |     | 0.986            |
| PBDE 209        | -0.03                | .  |     | -0.05                     | *  |     | 0.00       |    |     | 0.252            | -0.05                                        |    |     | 0.00   |     |     | -0.05     |     |     | -0.05  |     |     | 0.122            |
| PCB 5/8         | 0.00                 |    |     | 0.01                      |    |     | -0.01      |    |     | 0.552            | -0.16                                        |    |     | 0.04   |     |     | -0.01     |     |     | 0.01   |     |     | 0.796            |
| PCB 18/17       | 0.03                 | .  |     | 0.03                      |    |     | 0.27       |    |     | 0.289            | 0.03                                         |    |     | 0.47   |     |     | 0.29      |     |     | 0.32   |     |     | 0.472            |
| PCB 22          | 0.02                 |    |     | 0.01                      |    |     | 0.03       |    |     | 0.706            | 0.01                                         |    |     | 0.08   |     |     | 0.00      |     |     | 0.01   |     |     | 0.697            |
| PCB 31/28       | 0.00                 |    |     | 0.00                      |    |     | 0.02       |    |     | 0.732            | -0.03                                        |    |     | 0.06   |     |     | 0.00      |     |     | -0.02  |     |     | 0.737            |
| PCB 33/20       | 0.02                 |    |     | 0.01                      |    |     | 0.03       |    |     | 0.688            | 0.02                                         |    |     | 0.09   |     |     | 0.00      |     |     | 0.02   |     |     | 0.635            |
| PCB 37          | 0.01                 |    |     | 0.02                      |    |     | 0.02       |    |     | 0.965            | 0.06                                         |    |     | 0.05   |     |     | 0.01      |     |     | -0.03  |     |     | 0.769            |
| PCB 41/64       | 0.02                 |    |     | 0.09                      | *  |     | -0.02      |    |     | 0.040            | 0.06                                         |    |     | 0.01   |     |     | 0.02      |     |     | 0.02   |     |     | 0.937            |
| PCB 44          | 0.01                 |    |     | 0.09                      | *  |     | -0.02      |    |     | 0.036            | 0.01                                         |    |     | 0.00   |     |     | 0.02      |     |     | 0.02   |     |     | 0.995            |
| PCB 47/48/75    | -0.02                |    |     | 0.05                      |    |     | -0.04      |    |     | 0.105            | 0.03                                         |    |     | -0.03  |     |     | 0.00      |     |     | -0.01  |     |     | 0.925            |
| PCB 49/43       | 0.02                 |    |     | 0.09                      | *  |     | -0.02      |    |     | 0.042            | 0.03                                         |    |     | 0.00   |     |     | 0.02      |     |     | 0.03   |     |     | 0.977            |
| PCB 52/73       | 0.00                 |    |     | 0.09                      |    |     | -0.02      |    |     | 0.144            | -0.11                                        |    |     | -0.02  |     |     | 0.00      |     |     | 0.02   |     |     | 0.877            |
| PCB 66/80       | -0.01                |    |     | 0.02                      |    |     | -0.04      |    |     | 0.198            | 0.03                                         |    |     | -0.02  |     |     | 0.03      |     |     | -0.05  |     |     | 0.534            |
| PCB 70/76       | 0.01                 |    |     | 0.05                      |    |     | -0.02      |    |     | 0.179            | -0.08                                        |    |     | 0.02   |     |     | 0.01      |     |     | 0.03   |     |     | 0.707            |
| PCB 74/61       | -0.03                |    |     | -0.01                     |    |     | -0.04      |    |     | 0.387            | 0.02                                         |    |     | -0.06  |     |     | -0.03     |     |     | -0.04  |     |     | 0.649            |
| PCB 90/101/89   | 0.01                 |    |     | 0.09                      |    |     | -0.01      |    |     | 0.141            | -0.01                                        |    |     | -0.01  |     |     | 0.04      |     |     | 0.02   |     |     | 0.970            |
| PCB 93/95       | 0.01                 |    |     | 0.28                      | .  |     | 0.01       |    |     | 0.077            | -0.01                                        |    |     | 0.10   |     |     | 0.08      |     |     | 0.01   |     |     | 0.958            |
| PCB 99          | -0.03                |    |     | -0.02                     |    |     | -0.02      |    |     | 0.973            | 0.08                                         |    |     | -0.11  |     |     | -0.04     |     |     | -0.02  |     |     | 0.286            |
| PCB 85/120      | 0.00                 |    |     | 0.03                      |    |     | -0.02      |    |     | 0.316            | 0.02                                         |    |     | -0.01  |     |     | 0.00      |     |     | 0.01   |     |     | 0.977            |
| PCB 110         | 0.01                 |    |     | 0.07                      |    |     | -0.01      |    |     | 0.211            | -0.06                                        |    |     | 0.02   |     |     | 0.02      |     |     | 0.02   |     |     | 0.888            |

| Chemicals   | Overall<br>(n=2,284) |     |     | Interaction by infant sex |     |     |            |     |     |                  | Interaction by maternal race/ethnicity group |     |     |        |     |     |           |     |     |        |     |     |                  |
|-------------|----------------------|-----|-----|---------------------------|-----|-----|------------|-----|-----|------------------|----------------------------------------------|-----|-----|--------|-----|-----|-----------|-----|-----|--------|-----|-----|------------------|
|             | beta                 | p   | FDR | Boys Only                 |     |     | Girls Only |     |     |                  | Whites                                       |     |     | Blacks |     |     | Hispanics |     |     | Asians |     |     | P <sub>int</sub> |
|             |                      |     |     | beta                      | p   | FDR | beta       | p   | FDR | P <sub>int</sub> | beta                                         | p   | FDR | beta   | p   | FDR | beta      | p   | FDR | beta   | p   | FDR |                  |
| PCB 118/106 | -0.01                |     |     | 0.01                      |     |     | -0.01      |     |     | 0.633            | 0.09                                         | *   |     | -0.10  | .   |     | -0.06     |     |     | -0.04  |     |     | 0.013            |
| PCB 105/127 | -0.02                |     |     | -0.01                     |     |     | -0.02      |     |     | 0.788            | 0.09                                         | *   |     | -0.10  | .   |     | -0.10     |     |     | -0.05  |     |     | 0.011            |
| PCB 114/122 | 0.03                 |     |     | 0.04                      |     |     | 0.02       |     |     | 0.587            | 0.10                                         | *** | *   | -0.05  |     |     | -0.16     | *   |     | 0.08   |     |     | <0.001           |
| PCB 128     | -0.06                | **  |     | -0.06                     | .   |     | -0.06      | *   |     | 0.873            | -0.02                                        |     |     | -0.07  | .   |     | 0.00      |     |     | -0.14  | **  |     | 0.138            |
| PCB 137     | 0.02                 |     |     | 0.03                      |     |     | 0.01       |     |     | 0.608            | 0.08                                         | *   |     | 0.02   |     |     | -0.12     |     |     | -0.01  |     |     | 0.093            |
| PCB 138/158 | -0.03                |     |     | -0.03                     |     |     | -0.03      |     |     | 0.983            | 0.01                                         |     |     | -0.08  |     |     | -0.08     |     |     | -0.05  |     |     | 0.469            |
| PCB 146/161 | -0.04                |     |     | -0.02                     |     |     | -0.05      |     |     | 0.657            | 0.01                                         |     |     | -0.04  |     |     | -0.04     |     |     | -0.06  |     |     | 0.777            |
| PCB 153     | -0.04                |     |     | -0.03                     |     |     | -0.05      |     |     | 0.659            | -0.03                                        |     |     | -0.06  |     |     | 0.00      |     |     | -0.05  |     |     | 0.947            |
| PCB 156     | 0.05                 | *   |     | 0.04                      |     |     | 0.07       | *   |     | 0.542            | 0.07                                         | *   |     | 0.02   |     |     | -0.06     |     |     | 0.07   |     |     | 0.450            |
| PCB 157     | 0.02                 |     |     | 0.03                      |     |     | 0.01       |     |     | 0.542            | 0.07                                         | *   |     | -0.05  |     |     | -0.13     | *   |     | 0.00   |     |     | 0.016            |
| PCB 167     | -0.03                |     |     | -0.04                     |     |     | -0.02      |     |     | 0.632            | 0.03                                         |     |     | -0.08  |     |     | -0.21     | **  |     | -0.04  |     |     | 0.030            |
| PCB 170     | -0.01                |     |     | -0.02                     |     |     | 0.02       |     |     | 0.369            | -0.03                                        |     |     | -0.01  |     |     | 0.04      |     |     | 0.08   |     |     | 0.246            |
| PCB 172/192 | -0.04                |     |     | -0.04                     |     |     | -0.03      |     |     | 0.902            | -0.08                                        | *   |     | -0.05  |     |     | -0.06     |     |     | 0.06   |     |     | 0.056            |
| PCB 177     | -0.04                | .   |     | -0.05                     | .   |     | -0.03      |     |     | 0.626            | -0.08                                        | *   |     | -0.01  |     |     | -0.04     |     |     | -0.02  |     |     | 0.711            |
| PCB 180     | -0.02                |     |     | -0.02                     |     |     | 0.00       |     |     | 0.709            | -0.05                                        | .   |     | -0.02  |     |     | 0.05      |     |     | 0.07   |     |     | 0.123            |
| PCB 182/187 | -0.02                |     |     | -0.01                     |     |     | -0.01      |     |     | 0.871            | -0.09                                        |     |     | 0.02   |     |     | 0.04      |     |     | 0.01   |     |     | 0.531            |
| PCB 183     | -0.02                |     |     | -0.03                     |     |     | 0.00       |     |     | 0.617            | -0.06                                        | .   |     | 0.06   |     |     | 0.00      |     |     | 0.02   |     |     | 0.387            |
| PCB 194     | 0.00                 |     |     | -0.01                     |     |     | 0.03       |     |     | 0.373            | -0.03                                        |     |     | 0.11   |     |     | 0.12      |     |     | 0.10   | *   |     | 0.026            |
| PCB 195     | -0.02                |     |     | -0.02                     |     |     | 0.00       |     |     | 0.711            | -0.04                                        |     |     | -0.05  |     |     | 0.04      |     |     | 0.05   |     |     | 0.368            |
| PCB 196/203 | -0.03                |     |     | -0.02                     |     |     | -0.05      |     |     | 0.547            | -0.06                                        | *   |     | 0.00   |     |     | -0.04     |     |     | 0.05   |     |     | 0.241            |
| PCB 199     | -0.02                |     |     | -0.01                     |     |     | -0.05      |     |     | 0.409            | -0.06                                        | *   |     | 0.02   |     |     | -0.07     |     |     | 0.05   |     |     | 0.161            |
| PCB 202     | -0.04                |     |     | -0.02                     |     |     | -0.04      |     |     | 0.704            | -0.12                                        | *   |     | -0.01  |     |     | -0.07     |     |     | -0.01  |     |     | 0.444            |
| PCB 206     | 0.01                 |     |     | 0.02                      |     |     | -0.01      |     |     | 0.617            | -0.04                                        |     |     | 0.11   | .   |     | 0.02      |     |     | 0.01   |     |     | 0.229            |
| PCB 208     | -0.02                |     |     | 0.01                      |     |     | -0.05      |     |     | 0.345            | -0.02                                        |     |     | 0.05   |     |     | -0.04     |     |     | -0.04  |     |     | 0.719            |
| PCB 209     | -0.04                |     |     | 0.04                      |     |     | -0.08      | *   |     | 0.058            | 0.02                                         |     |     | -0.06  |     |     | 0.02      |     |     | -0.07  |     |     | 0.595            |
| NMeFOSAA    | 0.05                 | *   |     | 0.04                      |     |     | 0.05       |     |     | 0.829            | 0.05                                         |     |     | 0.00   |     |     | 0.01      |     |     | 0.16   | **  |     | 0.094            |
| PFDA        | 0.11                 | *** | *** | 0.10                      | **  | .   | 0.12       | *** | **  | 0.564            | 0.25                                         | *** | *** | 0.14   | *** |     | 0.21      | *** | **  | -0.14  | **  |     | <0.001           |
| PFDoDA      | 0.04                 | .   |     | 0.04                      |     |     | 0.04       |     |     | 0.914            | 0.27                                         | *** | **  | 0.13   | **  |     | 0.02      |     |     | -0.23  | *** | **  | <0.001           |
| PFDS        | -0.06                | *   |     | -0.06                     | .   |     | -0.05      | .   |     | 0.969            | -0.09                                        |     |     | 0.05   |     |     | -0.09     |     |     | -0.12  | *** | *   | 0.004            |
| PFHpA       | 0.12                 | *** | *** | 0.13                      | *** | **  | 0.11       | *** | **  | 0.607            | 0.23                                         | *** | *** | 0.04   |     |     | 0.08      | *   |     | 0.11   | *   |     | 0.008            |
| PFHxS       | 0.08                 | *** | *   | 0.08                      | *   |     | 0.08       | **  |     | 0.919            | 0.11                                         | *** | *   | 0.00   |     |     | 0.09      | .   |     | 0.15   | *   |     | 0.092            |
| PFNA        | 0.08                 | *** | *   | 0.04                      |     |     | 0.12       | *** | **  | 0.047            | 0.22                                         | *** | *** | 0.11   | **  |     | 0.08      | *   |     | -0.11  | *   |     | <0.001           |
| PFOA        | 0.13                 | *** | *** | 0.09                      | **  | .   | 0.17       | *** | *** | 0.046            | 0.16                                         | *** | **  | 0.14   | **  |     | 0.20      | *** | **  | 0.00   |     |     | 0.016            |
| PFOS        | 0.05                 | *   |     | 0.04                      |     |     | 0.05       | .   |     | 0.720            | 0.10                                         | *   |     | 0.05   |     |     | 0.19      | *** | *   | -0.13  | **  |     | <0.001           |
| PFOSA       | -0.02                |     |     | 0.02                      |     |     | -0.07      | *   |     | 0.023            | 0.06                                         |     |     | -0.05  |     |     | -0.02     |     |     | -0.04  |     |     | 0.177            |
| PFUnDA      | 0.02                 |     |     | 0.01                      |     |     | 0.03       |     |     | 0.662            | 0.21                                         | *** | *   | 0.12   | *** |     | 0.06      |     |     | -0.17  | *** | *** | <0.001           |

P-values: \*\*\*<0.001 ; \*\*0.001-0.01 ; \*<0.01-0.05 ; . 0.05-0.1

FDR: p-values after false discovery rate correction (\*\*\*<0.001 ; \*\*0.001-0.01 ; \*<0.01-0.05 ; . 0.05-0.1)

P<sub>int</sub>: p-values of interaction

Adjusted for maternal race/ethnicity (White, Black, Hispanic, Asian), maternal age (years, continuous), pre-pregnancy BMI (kg/m<sup>2</sup>, continuous), parity (0,1,2, 3 or more), highest level of education (Less than high school, High school diploma or GED or equivalent, Some college or Associate degree, Bachelors degree, Masters degree or Advanced degree), marital status (not married vs. living as married), infant sex (male, female), gestational age at the time of ultrasound (continuous), total serum lipids (except for PFASs, ng/mL, continuous) and log transformed plasma cotinine level (log(x+1), continuous), with repeated measurements of fetal growth (random effect variable corresponding to the mother-child pair), and with a smooth function for the gestational age.

**eTable 21: Association between EDCs and longitudinal outer orbit diameter using a generalized additive mixed model, NICHD Fetal Growth Studies – Singletons (n=2,284).**

| Chemicals       | Overall<br>(n=2,284) |     |     | Interaction by infant sex |     |     |            |     |     | Interaction by maternal race/ethnicity group |        |     |     |        |     |     |           |     |     |        |    |     |                  |
|-----------------|----------------------|-----|-----|---------------------------|-----|-----|------------|-----|-----|----------------------------------------------|--------|-----|-----|--------|-----|-----|-----------|-----|-----|--------|----|-----|------------------|
|                 | beta                 | p   | FDR | Boys Only                 |     |     | Girls Only |     |     | P <sub>int</sub>                             | Whites |     |     | Blacks |     |     | Hispanics |     |     | Asians |    |     | P <sub>int</sub> |
|                 |                      |     |     | beta                      | p   | FDR | beta       | p   | FDR |                                              | beta   | p   | FDR | beta   | p   | FDR | beta      | p   | FDR | beta   | p  | FDR |                  |
| β-HCH           | -0.07                | *   |     | -0.10                     | *   | *   | -0.03      |     |     | 0.233                                        | 0.21   |     |     | -0.39  |     |     | -0.89     | *** | *   | -0.05  |    |     | <0.001           |
| γ-HCH           | -0.05                | .   |     | -0.03                     |     |     | -0.25      | *   |     | 0.031                                        | 0.69   |     |     | 0.17   |     |     | -0.14     |     |     | -0.05  |    |     | 0.967            |
| HCB             | 0.02                 |     |     | 0.02                      |     |     | 0.02       |     |     | 0.887                                        | 0.34   |     |     | -0.25  |     |     | -0.08     |     |     | 0.02   |    |     | 0.789            |
| Oxychlorthane   | -0.04                |     |     | -0.93                     | *   | *   | -0.02      |     |     | 0.018                                        | -1.51  | **  | *   | -0.98  | *   |     | -1.10     |     |     | 0.00   |    |     | 0.004            |
| Trans-chlordane | 0.01                 |     |     | 0.02                      |     |     | -0.01      |     |     | 0.573                                        | 2.48   |     |     | -0.60  |     |     | 0.05      |     |     | 0.02   |    |     | 0.566            |
| Trans-nonachlor | -0.04                |     |     | -0.22                     |     |     | -0.02      |     |     | 0.203                                        | -0.49  | *   |     | -0.15  |     |     | 0.19      |     |     | -0.01  |    |     | 0.061            |
| p,p'-DDE        | -0.12                | *** | *   | -0.14                     | *** | **  | -0.10      | *   |     | 0.384                                        | -0.39  | **  | *   | 0.11   |     |     | -0.16     | *** | .   | -0.08  |    |     | 0.017            |
| o,p'-DDD        | 0.07                 | **  |     | 0.01                      |     |     | 0.10       | **  |     | 0.121                                        | 0.16   |     |     | -0.04  |     |     | 0.09      |     |     | 0.12   | ** |     | 0.077            |
| p,p'-DDD        | 0.09                 | **  | .   | 0.13                      | **  | *   | 0.07       | .   |     | 0.310                                        | 0.30   | *   |     | 0.00   |     |     | 0.06      |     |     | 0.09   | *  |     | 0.273            |
| p,p'-DDT        | 0.01                 |     |     | -0.01                     |     |     | 0.03       |     |     | 0.435                                        | 1.53   | *** | **  | 0.26   |     |     | -0.05     |     |     | 0.06   |    |     | <0.001           |
| Mirex           | -0.04                |     |     | -0.04                     |     |     | -0.05      |     |     | 0.818                                        | 0.12   |     |     | -0.07  |     |     | -0.12     | **  |     | 0.10   | .  |     | 0.005            |
| PBB 153         | 0.08                 | **  |     | 0.10                      | **  | *   | 0.02       |     |     | 0.184                                        | 0.08   | .   |     | -0.06  |     |     | -0.04     |     |     | 0.12   | ** |     | 0.147            |
| PBDE 28         | 0.00                 |     |     | 0.01                      |     |     | -0.05      |     |     | 0.465                                        | -0.63  | *** | *** | 0.07   | .   |     | 0.00      |     |     | -0.07  |    |     | <0.001           |
| PBDE 47         | -0.14                | *** | *** | -0.08                     | *   | .   | -0.19      | *** | *** | 0.048                                        | -0.30  | *** | *** | -0.02  |     |     | -0.06     |     |     | -0.16  | *  |     | <0.001           |
| PBDE 85         | -0.06                | *   |     | 0.01                      |     |     | -0.17      | *** | **  | <0.001                                       | -0.20  | *** | **  | -0.01  |     |     | 0.03      |     |     | -0.19  | *  |     | <0.001           |
| PBDE 99         | -0.08                | **  |     | -0.04                     |     |     | -0.13      | **  |     | 0.133                                        | -0.30  | *** | *** | -0.02  |     |     | 0.04      |     |     | -0.06  |    |     | <0.001           |
| PBDE 100        | -0.10                | *** | **  | -0.08                     | *   | *   | -0.11      | **  |     | 0.534                                        | -0.33  | *** | *** | -0.03  |     |     | 0.03      |     |     | -0.22  | ** |     | <0.001           |
| PBDE 153        | -0.10                | *** | *   | -0.10                     | *   | *   | -0.10      | *   |     | 0.995                                        | -0.20  | *** | *** | 0.00   |     |     | -0.02     |     |     | -0.02  |    |     | 0.009            |
| PBDE 154        | -0.11                | *** | **  | -0.09                     | *   | *   | -0.14      | *** | *   | 0.256                                        | -0.23  | *** | *** | -0.10  | .   |     | 0.02      |     |     | -0.21  | ** |     | <0.001           |
| PBDE 183        | -0.01                |     |     | -0.05                     |     |     | 0.06       |     |     | 0.036                                        | -0.02  |     |     | 0.14   |     |     | -0.02     |     |     | -0.02  |    |     | 0.097            |
| PBDE 209        | -0.05                | *   |     | -0.03                     |     |     | -0.09      | *   |     | 0.281                                        | -0.03  |     |     | -0.09  |     |     | -0.03     |     |     | -0.03  |    |     | 0.061            |
| PCB 5/8         | 0.03                 |     |     | 0.05                      |     |     | 0.03       |     |     | 0.795                                        | 0.55   | *   |     | 0.20   | *   |     | -0.01     |     |     | 0.02   |    |     | 0.045            |
| PCB 18/17       | 0.06                 | *   |     | 0.06                      | *   | *   | 0.09       |     |     | 0.938                                        | 0.05   | *   |     | 0.94   | *   |     | -0.43     |     |     | 1.37   |    |     | 0.083            |
| PCB 22          | 0.08                 | *   |     | 0.05                      |     |     | 0.11       | *   |     | 0.374                                        | 0.36   | *** | **  | 0.31   | *** | *   | -0.02     |     |     | 0.11   |    |     | <0.001           |
| PCB 31/28       | 0.09                 | **  |     | 0.06                      | .   |     | 0.13       | *   |     | 0.340                                        | 0.45   | *** | **  | 0.28   | *** | *   | -0.02     |     |     | 0.10   |    |     | <0.001           |
| PCB 33/20       | 0.07                 | *   |     | 0.04                      |     |     | 0.11       | *   |     | 0.288                                        | 0.35   | **  | *   | 0.30   | *** | *   | -0.02     |     |     | 0.08   |    |     | <0.001           |
| PCB 37          | 0.09                 | **  |     | 0.07                      | .   |     | 0.11       | *   |     | 0.502                                        | 0.28   | **  | *   | 0.26   | *** | *   | 0.01      |     |     | 0.08   |    |     | 0.006            |
| PCB 41/64       | 0.07                 | *   |     | 0.18                      | **  | *   | 0.03       |     |     | 0.037                                        | 0.24   | *   |     | 0.10   | .   |     | 0.04      |     |     | 0.03   |    |     | 0.308            |
| PCB 44          | 0.09                 | *   |     | 0.20                      | **  | *   | 0.04       |     |     | 0.035                                        | 0.33   | **  | *   | 0.11   | .   |     | 0.06      |     |     | 0.03   |    |     | 0.094            |
| PCB 47/48/75    | 0.06                 | .   |     | 0.16                      | *   | *   | 0.03       |     |     | 0.066                                        | 0.30   | *   |     | 0.05   |     |     | 0.04      |     |     | 0.05   |    |     | 0.199            |
| PCB 49/43       | 0.07                 | *   |     | 0.16                      | **  | *   | 0.04       |     |     | 0.089                                        | 0.25   | *   |     | 0.10   | .   |     | 0.03      |     |     | 0.03   |    |     | 0.240            |
| PCB 52/73       | 0.06                 |     |     | 0.26                      | **  | *   | 0.03       |     |     | 0.031                                        | 0.66   | **  | *   | 0.14   |     |     | 0.02      |     |     | 0.02   |    |     | 0.019            |
| PCB 66/80       | 0.11                 | **  | *   | 0.16                      | **  | **  | 0.07       |     |     | 0.149                                        | 0.34   | *** | **  | 0.12   | *   |     | 0.05      |     |     | 0.06   |    |     | 0.048            |
| PCB 70/76       | 0.11                 | **  | .   | 0.17                      | **  | **  | 0.07       |     |     | 0.116                                        | 0.43   | *** | **  | 0.15   | *   |     | 0.03      |     |     | 0.05   |    |     | 0.008            |
| PCB 74/61       | 0.06                 | .   |     | 0.13                      | **  | *   | -0.01      |     |     | 0.017                                        | 0.16   | **  |     | 0.08   |     |     | -0.02     |     |     | 0.02   |    |     | 0.214            |
| PCB 90/101/89   | 0.10                 | *   |     | 0.31                      | *** | **  | 0.05       |     |     | 0.005                                        | 0.59   | *** | **  | 0.18   | *   |     | 0.12      |     |     | 0.02   |    |     | 0.003            |
| PCB 93/95       | 0.04                 |     |     | 0.73                      | *** | **  | 0.02       |     |     | <0.001                                       | 1.24   | **  | *   | 0.58   | **  |     | 0.12      |     |     | 0.00   |    |     | <0.001           |
| PCB 99          | 0.08                 | *   |     | 0.34                      | *** | **  | 0.01       |     |     | <0.001                                       | 0.19   | *   |     | 0.23   | *   |     | 0.01      |     |     | 0.02   |    |     | 0.146            |
| PCB 85/120      | 0.15                 | *** | **  | 0.25                      | *** | *** | 0.08       | .   |     | 0.013                                        | 0.38   | *** | *** | 0.19   | **  | .   | 0.04      |     |     | 0.04   |    |     | 0.003            |
| PCB 110         | 0.11                 | **  |     | 0.27                      | *** | **  | 0.05       |     |     | 0.008                                        | 0.46   | *** | **  | 0.20   | **  |     | 0.08      |     |     | 0.01   |    |     | 0.004            |



| Chemicals   | Overall<br>(n=2,284) |     |     | Interaction by infant sex |     |     |            |     |     |                  | Interaction by maternal race/ethnicity group |     |     |        |     |     |           |     |     |        |   |     |                  |
|-------------|----------------------|-----|-----|---------------------------|-----|-----|------------|-----|-----|------------------|----------------------------------------------|-----|-----|--------|-----|-----|-----------|-----|-----|--------|---|-----|------------------|
|             | beta                 | p   | FDR | Boys Only                 |     |     | Girls Only |     |     |                  | Whites                                       |     |     | Blacks |     |     | Hispanics |     |     | Asians |   |     | P <sub>int</sub> |
|             |                      |     |     | beta                      | p   | FDR | beta       | p   | FDR | P <sub>int</sub> | beta                                         | p   | FDR | beta   | p   | FDR | beta      | p   | FDR | beta   | p | FDR |                  |
| PCB 118/106 | 0.04                 |     |     | 0.14                      | **  | *   | -0.02      |     |     | 0.011            | 0.06                                         |     |     | 0.11   |     |     | -0.08     |     |     | 0.02   |   |     | 0.450            |
| PCB 105/127 | 0.04                 |     |     | 0.15                      | **  | *   | -0.02      |     |     | 0.010            | 0.07                                         |     |     | 0.16   | *   |     | -0.07     |     |     | 0.00   |   |     | 0.197            |
| PCB 114/122 | 0.04                 |     |     | 0.05                      |     |     | 0.04       |     |     | 0.913            | 0.00                                         |     |     | 0.09   | .   |     | 0.11      |     |     | 0.07   |   |     | 0.523            |
| PCB 128     | 0.03                 |     |     | 0.05                      |     |     | 0.01       |     |     | 0.499            | 0.05                                         |     |     | 0.07   |     |     | 0.01      |     |     | -0.02  |   |     | 0.749            |
| PCB 137     | 0.00                 |     |     | 0.08                      |     |     | -0.04      |     |     | 0.055            | 0.03                                         |     |     | 0.01   |     |     | -0.02     |     |     | -0.03  |   |     | 0.887            |
| PCB 138/158 | 0.02                 |     |     | 0.09                      | .   |     | -0.04      |     |     | 0.038            | 0.02                                         |     |     | 0.10   |     |     | -0.03     |     |     | 0.00   |   |     | 0.718            |
| PCB 146/161 | 0.04                 |     |     | 0.13                      | *   | *   | -0.02      |     |     | 0.029            | 0.15                                         | .   |     | 0.22   | **  |     | -0.08     |     |     | -0.03  |   |     | 0.026            |
| PCB 153     | 0.04                 |     |     | 0.13                      | **  | *   | -0.04      |     |     | 0.005            | 0.06                                         |     |     | 0.16   | .   |     | 0.08      |     |     | -0.01  |   |     | 0.413            |
| PCB 156     | 0.03                 |     |     | 0.07                      | *   | .   | -0.03      |     |     | 0.053            | 0.04                                         |     |     | 0.04   |     |     | 0.00      |     |     | 0.02   |   |     | 0.976            |
| PCB 157     | 0.01                 |     |     | 0.05                      |     |     | -0.06      |     |     | 0.038            | 0.03                                         |     |     | -0.04  |     |     | 0.04      |     |     | -0.03  |   |     | 0.770            |
| PCB 167     | 0.01                 |     |     | 0.08                      | .   |     | -0.06      |     |     | 0.023            | 0.07                                         |     |     | 0.02   |     |     | -0.08     |     |     | -0.02  |   |     | 0.452            |
| PCB 170     | 0.04                 |     |     | 0.06                      | .   |     | -0.03      |     |     | 0.152            | 0.03                                         |     |     | 0.23   | .   |     | 0.12      |     |     | -0.01  |   |     | 0.333            |
| PCB 172/192 | 0.06                 | .   |     | 0.10                      | **  | *   | -0.01      |     |     | 0.068            | 0.10                                         | *   |     | 0.12   |     |     | 0.05      |     |     | -0.01  |   |     | 0.407            |
| PCB 177     | 0.02                 |     |     | 0.08                      | .   |     | -0.05      |     |     | 0.042            | 0.07                                         |     |     | 0.32   | **  |     | -0.08     |     |     | -0.08  |   |     | 0.005            |
| PCB 180     | 0.05                 |     |     | 0.08                      | *   | *   | -0.04      |     |     | 0.050            | 0.04                                         |     |     | 0.26   | *   |     | 0.12      |     |     | -0.01  |   |     | 0.179            |
| PCB 182/187 | 0.07                 | .   |     | 0.20                      | **  | *   | 0.00       |     |     | 0.010            | 0.17                                         | *   |     | 0.45   | **  | .   | 0.18      |     |     | -0.02  |   |     | 0.005            |
| PCB 183     | 0.05                 |     |     | 0.10                      | *   | *   | -0.01      |     |     | 0.075            | 0.04                                         |     |     | 0.36   | **  | .   | 0.30      | *   |     | -0.04  |   |     | 0.005            |
| PCB 194     | 0.05                 | .   |     | 0.07                      | *   | *   | -0.06      |     |     | 0.048            | 0.04                                         |     |     | 0.30   | **  |     | 0.38      | **  |     | -0.04  |   |     | 0.009            |
| PCB 195     | 0.04                 |     |     | 0.06                      | .   | .   | -0.03      |     |     | 0.127            | 0.03                                         |     |     | 0.30   | *   |     | 0.31      | *   |     | -0.03  |   |     | 0.028            |
| PCB 196/203 | 0.03                 |     |     | 0.09                      | **  | *   | -0.11      | *   |     | <0.001           | 0.04                                         |     |     | 0.18   | *   |     | 0.13      |     |     | -0.05  |   |     | 0.173            |
| PCB 199     | 0.03                 |     |     | 0.10                      | **  | *   | -0.10      | .   |     | <0.001           | 0.03                                         |     |     | 0.20   | *   |     | 0.19      |     |     | -0.05  |   |     | 0.077            |
| PCB 202     | 0.07                 | .   |     | 0.21                      | *** | **  | -0.02      |     |     | <0.001           | 0.13                                         |     |     | 0.27   | **  |     | 0.15      |     |     | -0.01  |   |     | 0.039            |
| PCB 206     | 0.02                 |     |     | 0.10                      | *   | .   | -0.10      | .   |     | 0.007            | -0.08                                        |     |     | 0.21   | *   |     | 0.45      | **  |     | -0.04  |   |     | <0.001           |
| PCB 208     | -0.02                |     |     | 0.06                      |     |     | -0.12      | *   |     | 0.025            | -0.16                                        | .   |     | 0.14   |     |     | 0.06      |     |     | -0.04  |   |     | 0.101            |
| PCB 209     | 0.07                 |     |     | 0.20                      | **  | *   | -0.01      |     |     | 0.016            | 0.16                                         | .   |     | 0.11   |     |     | 0.00      |     |     | 0.03   |   |     | 0.583            |
| NMeFOSAA    | -0.13                | *** | **  | -0.08                     | .   | .   | -0.18      | *** | **  | 0.098            | -0.21                                        | *** | *   | -0.03  |     |     | -0.25     | *** | *   | -0.11  |   |     | 0.025            |
| PFDA        | -0.08                | **  |     | -0.10                     | *   | .   | -0.07      | .   |     | 0.634            | -0.53                                        | *** | *** | 0.02   |     |     | 0.11      |     |     | 0.07   |   |     | <0.001           |
| PFDoDA      | 0.03                 |     |     | 0.01                      |     |     | 0.03       |     |     | 0.662            | -0.38                                        | *** | *** | 0.13   | *   |     | 0.04      |     |     | 0.08   |   |     | <0.001           |
| PFDS        | 0.03                 |     |     | 0.06                      |     |     | -0.02      |     |     | 0.149            | 0.05                                         |     |     | -0.03  |     |     | 0.03      |     |     | 0.06   |   |     | 0.662            |
| PFHpA       | 0.03                 |     |     | 0.00                      |     |     | 0.05       |     |     | 0.372            | -0.07                                        |     |     | 0.10   |     |     | 0.08      | .   |     | -0.01  |   |     | 0.075            |
| PFHxS       | -0.13                | *** | **  | -0.13                     | *** | **  | -0.12      | **  |     | 0.845            | -0.18                                        | *** | **  | -0.19  | *** | *   | 0.02      |     |     | -0.02  |   |     | 0.028            |
| PFNA        | -0.06                | *   |     | -0.05                     |     |     | -0.06      | .   |     | 0.789            | -0.42                                        | *** | *** | 0.07   |     |     | 0.05      |     |     | 0.03   |   |     | <0.001           |
| PFOA        | -0.06                | *   |     | -0.09                     | *   | .   | -0.04      |     |     | 0.429            | -0.27                                        | *** | *** | 0.08   |     |     | 0.06      |     |     | 0.02   |   |     | <0.001           |
| PFOS        | -0.09                | **  |     | -0.05                     |     |     | -0.13      | **  |     | 0.153            | -0.29                                        | *** | *** | -0.12  | *   |     | 0.03      |     |     | 0.05   |   |     | <0.001           |
| PFOSA       | -0.02                |     |     | 0.04                      |     |     | -0.13      | **  |     | 0.002            | -0.17                                        | **  | *   | 0.00   |     |     | -0.02     |     |     | 0.04   |   |     | 0.037            |
| PFUnDA      | 0.02                 |     |     | 0.06                      |     |     | -0.01      |     |     | 0.232            | -0.43                                        | *** | *** | 0.08   | .   |     | 0.07      |     |     | 0.09   | . |     | <0.001           |

P-values: \*\*\*<0.001 ; \*\*0.001-0.01 ; \*<0.01-0.05 ; . 0.05-0.1

FDR: p-values after false discovery rate correction (\*\*\*<0.001 ; \*\*0.001-0.01 ; \*<0.01-0.05 ; . 0.05-0.1)

P<sub>int</sub>: p-values of interaction

Adjusted for maternal race/ethnicity (White, Black, Hispanic, Asian), maternal age (years, continuous), pre-pregnancy BMI (kg/m<sup>2</sup>, continuous), parity (0,1,2, 3 or more), highest level of education (Less than high school, High school diploma or GED or equivalent, Some college or Associate degree, Bachelors degree, Masters degree or Advanced degree), marital status (not married vs. living as married), infant sex (male, female), gestational age at the time of ultrasound (continuous), total serum lipids (except for PFASs, ng/mL, continuous) and log transformed plasma cotinine level (log(x+1), continuous), with repeated measurements of fetal growth (random effect variable corresponding to the mother-child pair), and with a smooth function for the gestational age.
